# Supplementary material for: Metal-free dearomative [5+2]/[2+2] cycloaddition of 1H-indoles with ortho-(trimethylsilyl)aryl triflates
Source: Royal Society of Chemistry journal article supplement (doi:10.1039/d1cc02550c), 2021-01-01

## *Supporting Information*

### **Metal-free dearomative [5+2]/[2+2] cycloaddition of 1*H*-indoles with *ortho*-(trimethylsilyl)aryl triflates**

Xinyu Chen,<sup>†</sup> Na Yang,<sup>†</sup> Wen Zeng,<sup>†</sup> Lei Wang,<sup>\*†,‡,§</sup> Pinhua Li,<sup>†</sup> and Hongji Li<sup>\*†</sup>

<sup>†</sup>Key Laboratory of Green and Precise Synthetic Chemistry and Applications, Ministry of Education; Department of Chemistry, Huaibei Normal University, Huaibei, Anhui 235000, P. R. China; E-mail: hongjili@chnu.edu.cn

<sup>‡</sup>Advanced Research Institute and Department of Chemistry, Taizhou University, Taizhou, Zhejiang 318000, P. R. China; E-mail: leiwang88@hotmail.com

<sup>§</sup>State Key Laboratory of Organometallic Chemistry, Shanghai Institute of Organic Chemistry, Shanghai 200032, People's Republic of China

### *Table of Contents for Supporting Information*

|                                                                        |    |
|------------------------------------------------------------------------|----|
| 1. General Considerations.....                                         | 1  |
| 2. Typical Procedure for the Synthesis of <b>3a</b> .....              | 1  |
| 3. Mechanistic Experiments.....                                        | 2  |
| 4. Gram-scale Synthesis of <b>3a</b> .....                             | 8  |
| 5. Characterization Data for the Products.....                         | 8  |
| 6. References.....                                                     | 24 |
| 7. <sup>1</sup> H and <sup>13</sup> C NMR Spectra of the Products..... | 24 |
| 8. HRMS Analysis Reports for All Compounds.....                        | 59 |
| 9. Crystallographic Data for <b>3a</b> and <b>4a</b> .....             | 68 |

## 1. General Considerations

All  $^1\text{H}$  NMR and  $^{13}\text{C}$  NMR spectra were recorded on a 600 MHz Bruker FT-NMR spectrometer (600 MHz and 150 MHz, respectively). All chemical shifts are given as  $\delta$  value (ppm) with reference to tetramethylsilane (TMS) as an internal standard. The peak patterns are indicated as follows: s, singlet; d, doublet; t, triplet; m, multiplet; q, quartet. The coupling constants,  $J$ , are reported in Hertz (Hz). High resolution mass spectroscopy data of the products were collected on an Agilent Technologies 6540 UHD Accurate-Mass Q-TOF LC/MS (ESI) and a Thermo Fisher Scientific LTQ FTICR-MS instrument. Melting points were determined in open capillary tube using WRS-1B digital melting point apparatus.

The starting materials, such as 1*H*-indoles and 2-(trimethylsilyl)aryltrifluoromethanesulfonates, were prepared according to the reported methods <sup>[1-2]</sup>. All the solvents were dried and freshly distilled prior to use. Products were purified by flash chromatography on silica gels, eluting with petroleum ether/ethyl acetate (20:1 to 100:1).

## 2. Typical Procedure for the Synthesis of 3a

In a 10 mL oven-dried quartz equipped with a magnetic stirrer bar was charged with 2-phenyl-1*H*-indole (**1a**, 36.4 mg, 0.20 mmol), CsF (121.5 mg, 0.80 mmol), 2-(trimethylsilyl)phenyltrifluoromethanesulfonate (**2a**, 149.0 mg, 0.50 mmol) and 18-crown-6 (132.16 mg, 0.50 mmol). Then freshly distilled acetonitrile (1.0 mL) was added to the resulted mixture. The reaction was stirred at room temperature for 0.5 h. After that, the mixture in reaction tube was detected by TLC. The crude product was purified by flash chromatography (silica gel, petroleum ether/ethyl acetate = 20:1 to 100:1), affording the desired product **3a** as a pale green solid (40.9 mg, 76% yield).

### 3. Mechanistic Experiments

#### Control experiments for [5+2] cycloaddition

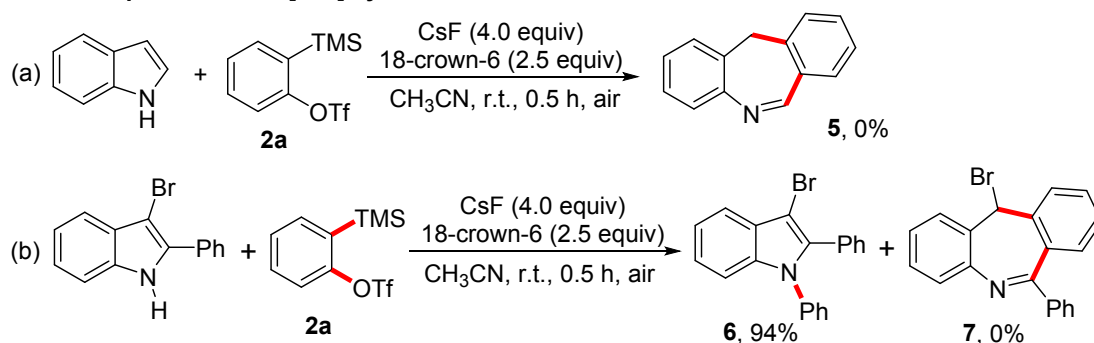

#### Isotope-labeling experiment

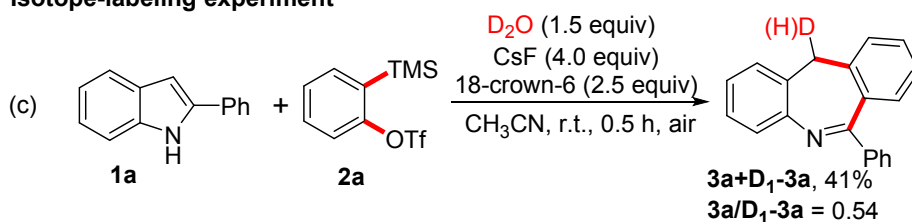

#### Control experiments for [2+2] cycloaddition

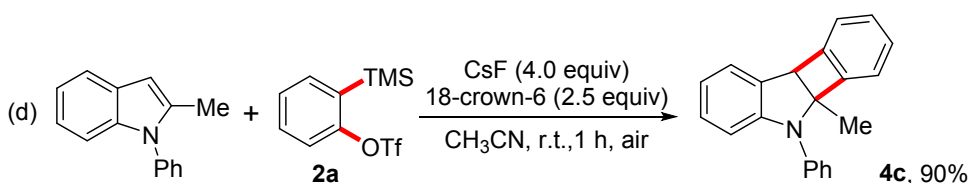

Scheme S1 Mechanistic experiments.

### 3.1 Control Experiments for [5+2] Cycloaddition

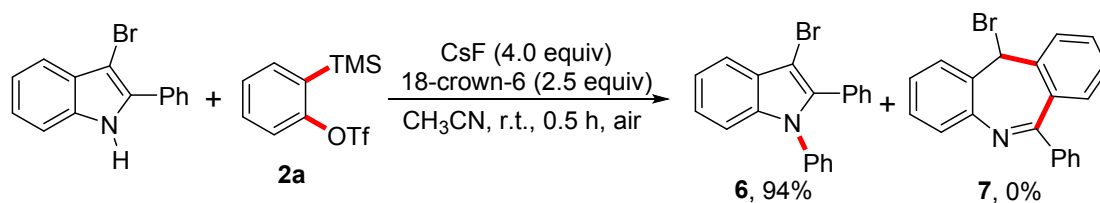

In a 10 mL oven-dried quartz equipped with a magnetic stirrer bar was charged with 3-bromo-2-phenyl-1*H*-indole (54.2 mg, 0.2 mmol), CsF (121.5 mg, 0.8 mmol), 2-(trimethylsilyl)phenyltrifluoromethanesulfonate (**2a**, 149.0 mg, 0.5 mmol) and 18-crown-6 (132.1 mg, 0.5 mmol). Then freshly distilled acetonitrile (1.0 mL) was added to the resulted mixture. The reaction was stirred at room temperature for 0.5 h. After that, the mixture in reaction tube was detected by TLC. The crude product was purified by flash chromatography (silica gel, petroleum ether/ethyl acetate = 20:1), affording the desired product **6** as a white solid (65.2 mg, 94% yield).

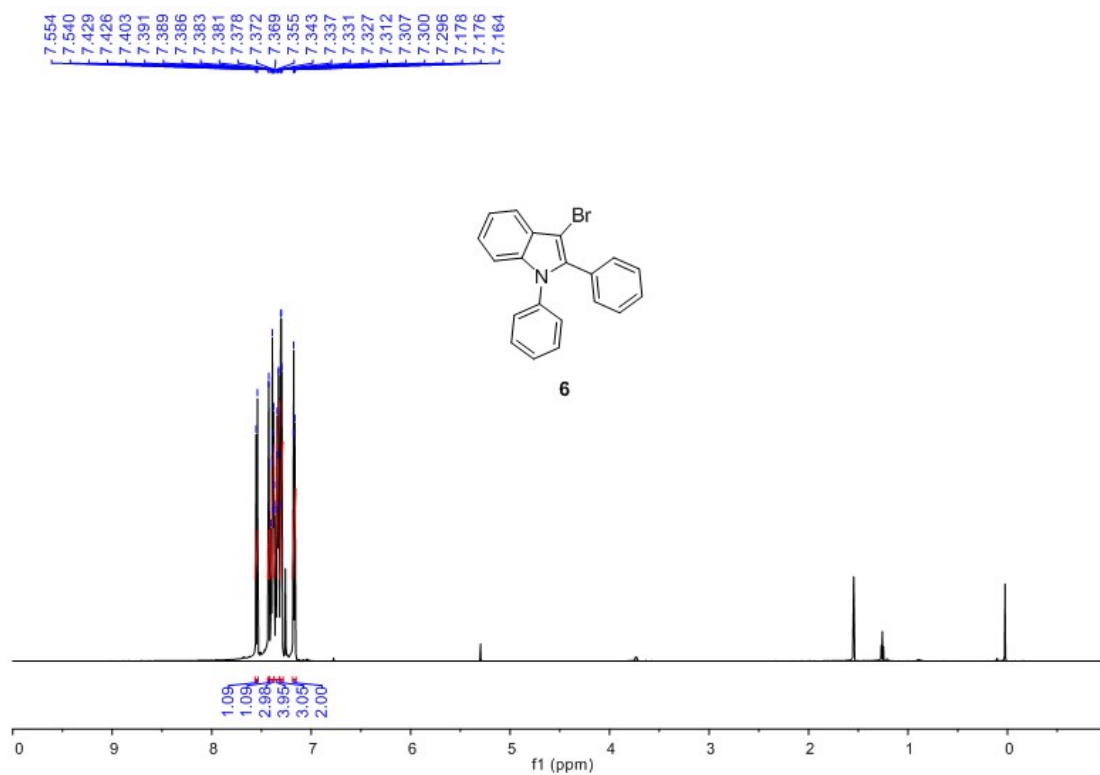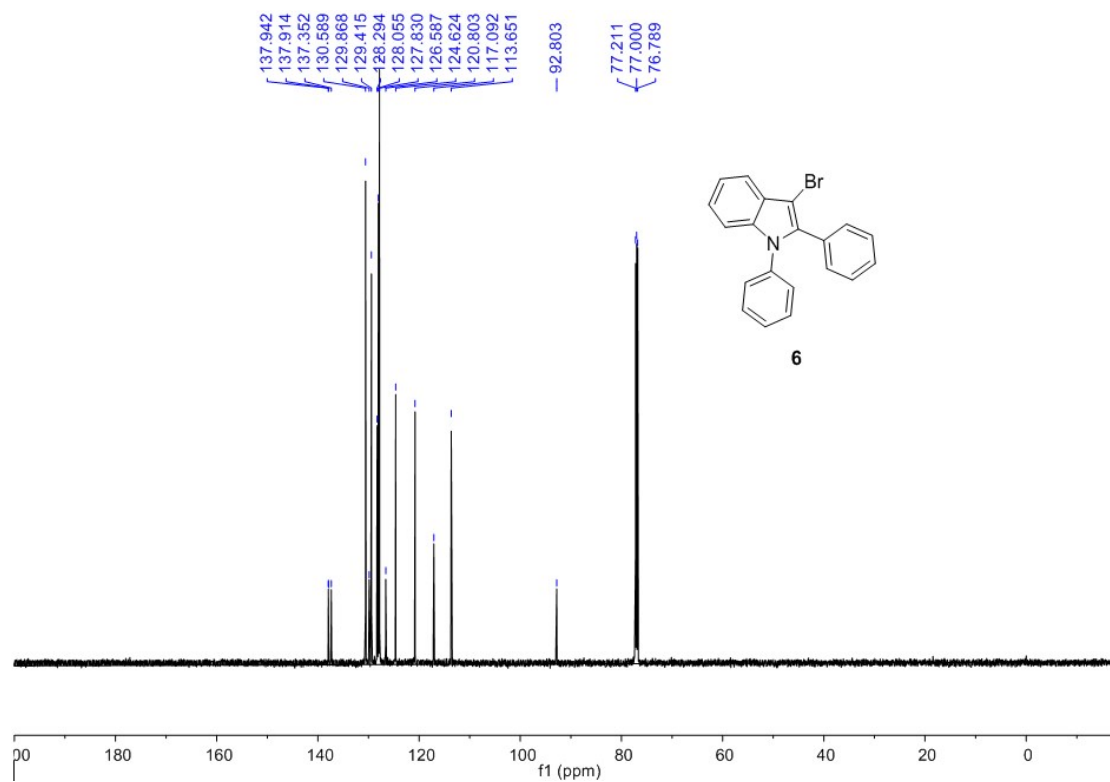

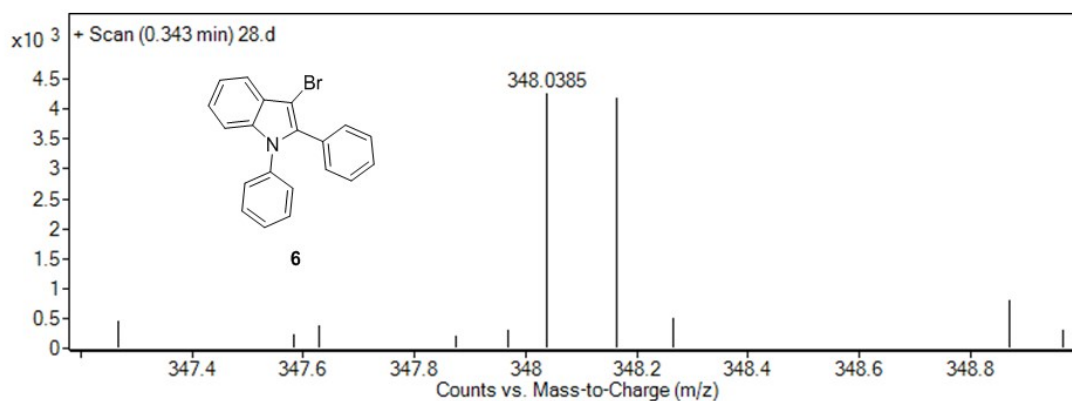

**3-Bromo-1,2-diphenyl-1H-indole (6):** White solid; 65.2 mg, 94% yield; <sup>1</sup>H NMR (600 MHz, CDCl<sub>3</sub>) δ 7.55 (d, *J* = 8.4 Hz, 1H), 7.43 (d, *J* = 1.8 Hz, 1H), 7.42–7.37 (m, 3H), 7.37–7.32 (m, 4H), 7.31–7.30 (m, 3H), 7.19–7.15 (m, 2H). <sup>13</sup>C NMR (151 MHz, CDCl<sub>3</sub>) δ 137.94, 137.91, 137.35, 130.59, 129.87, 129.42, 128.29, 128.06, 127.83, 126.59, 124.62, 120.80, 117.09, 113.65, 92.80, 77.21, 77.00, 76.79. HRMS (ESI) calcd for C<sub>20</sub>H<sub>15</sub>BrN [M+H]<sup>+</sup> 348.0382, found 348.0385.

### 3.2 Isotope-labeling Experiment

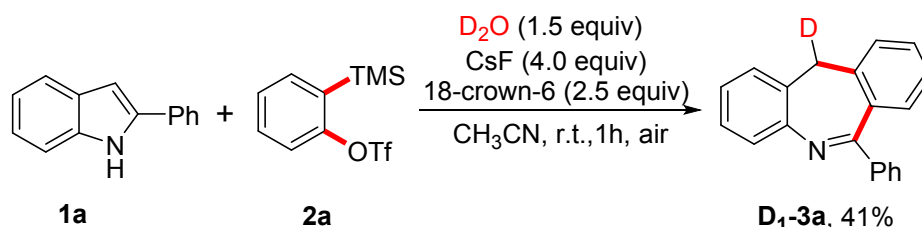

In a 10 mL oven-dried quartz equipped with a magnetic stirrer bar was charged with 2-phenyl-1H-indole (**1a**, 36.4 mg, 0.20 mmol), CsF (121.5 mg, 0.80 mmol), 2-(trimethylsilyl)phenyltrifluoromethanesulfonate (**2a**, 149.0 mg, 0.50 mmol), D<sub>2</sub>O (5.5 μL, 0.30 mmol) and 18-crown-6 (132.1 mg, 0.50 mmol). Then freshly distilled acetonitrile (1.0 mL) was added to the resulted mixture. The reaction was stirred at room temperature for 0.5 h. After that, the mixture in reaction tube was detected by TLC. The crude product was purified by flash chromatography (silica gel, petroleum ether/ethyl acetate = 50:1), affording the desired product **3a** and **D<sub>1</sub>-3a** as a Pale green solid (22.2 mg, 41% yield). The ratio of **3a**/**D<sub>1</sub>-3a** was determined as 0.54 by <sup>1</sup>H NMR analysis.

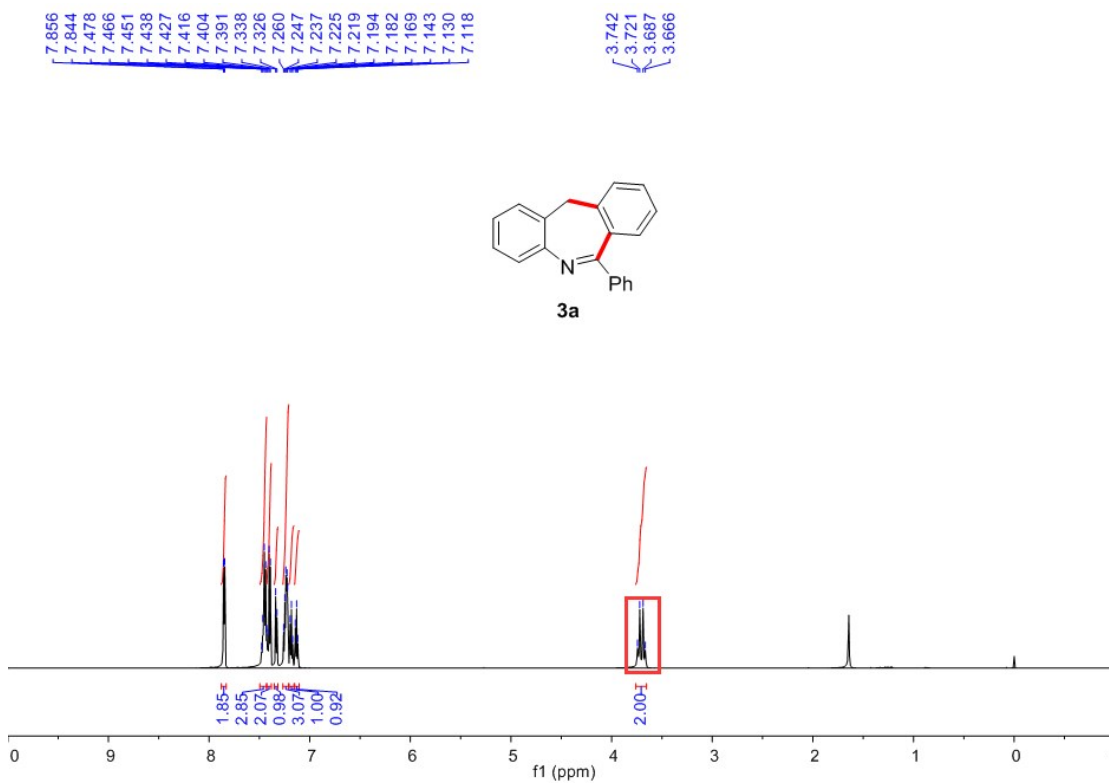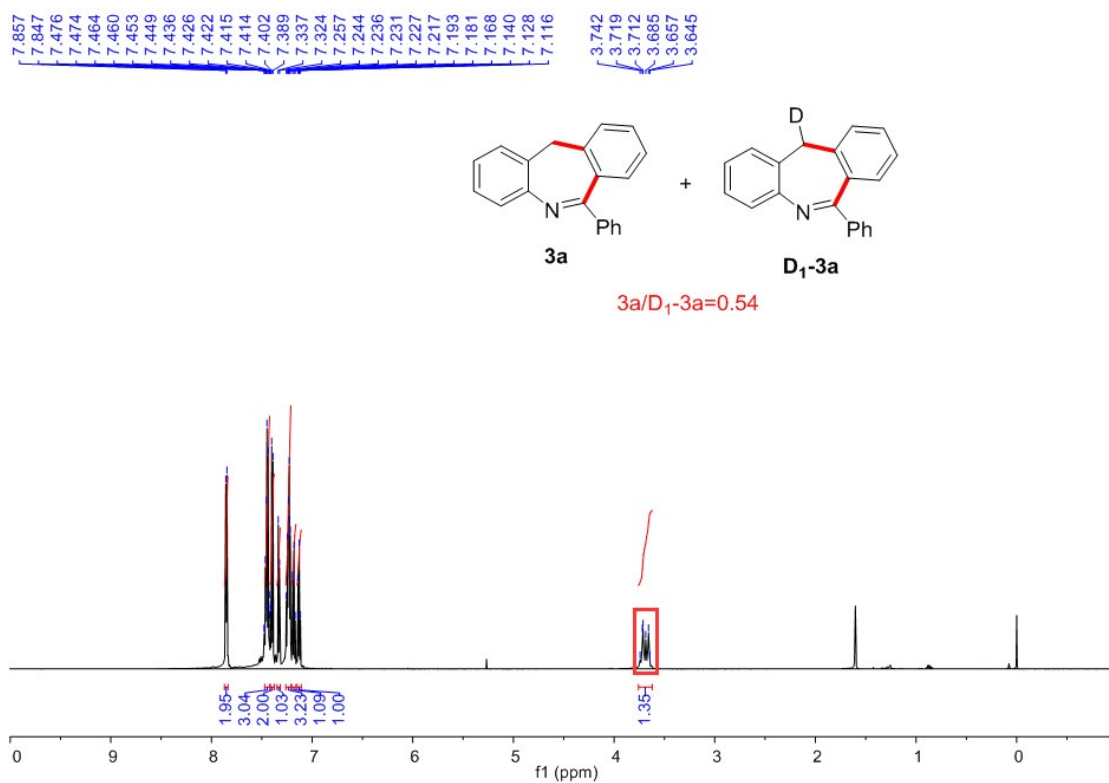

### 3.3 Control Experiments for [2+2] Cycloaddition

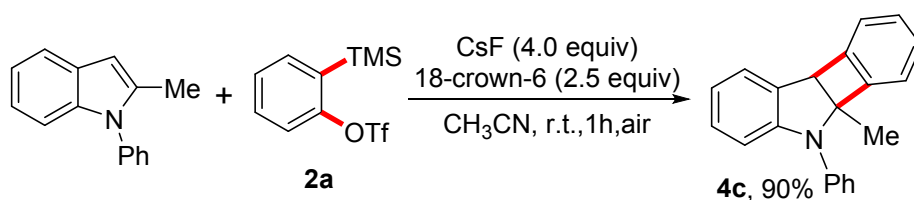

In a 10 mL oven-dried quartz equipped with a magnetic stirrer bar was charged with 2-methyl-1-phenyl-1*H*-indole (41.4 mg, 0.20 mmol), CsF (121.5 mg, 0.80 mmol), 2-(trimethylsilyl) phenyl trifluoromethanesulfonate (**2a**, 149.0 mg, 0.50 mmol) and 18-crown-6 (132.1 mg, 0.50 mmol). Then freshly distilled acetonitrile (1.0 mL) was added to the resulted mixture. The reaction was stirred at room temperature for 1 h. After that, the mixture in reaction tube was detected by TLC. The crude product was purified by flash chromatography (silica gel, petroleum ether/ethyl acetate = 100:1), affording the desired product **4c** as a Pale green liquid. (51.0 mg, 90% yield).

### 3.4 Conditional controlled experiments for the [5+2]/[2+2] cycloaddition

To get a deeper understanding of the reaction mechanism, some representative 2-substitued indoles with steric group, such as **1y**, **1z** and **1u**, were tested their reactions with **2a** under the conditions a in table 2, indicating that only [2+2] cycloaddition products were achieved in lower yields and [5+2] products were not observed (Scheme 1a-c). Similarly, we tested the reaction of 2-arylindoles, such as **1a**, **1g** and **1s**, with **2a** under the conditions b in table 3, and found that only according [5+2] products were observed, and no [2+2] products were isolated (Scheme 1d-f).

In addition, we performed the pure [5+2] product **3a** under the conditions b for exploring the possible transformation into [2+2] cycloaddition product, but no desired product was observed (Scheme 1g).

Finally, the results from the above control experiments further support the mechanism proposal for the [5+2] and [2+2] cycloaddition that listed in the main text of the manuscript.

**Condition a for [2+2] cycloaddition:**

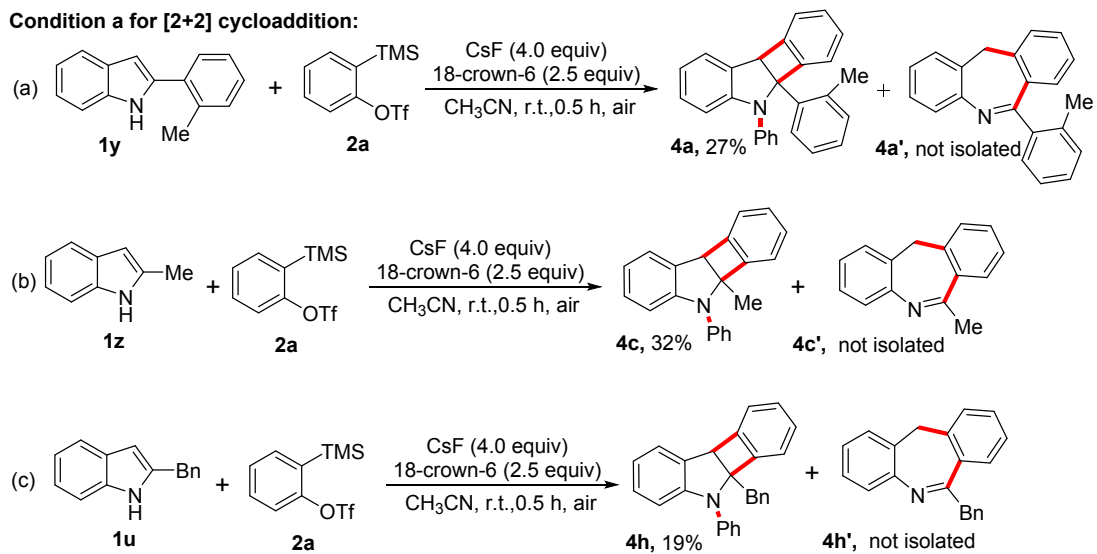

**Condition b for [5+2] cycloaddition:**

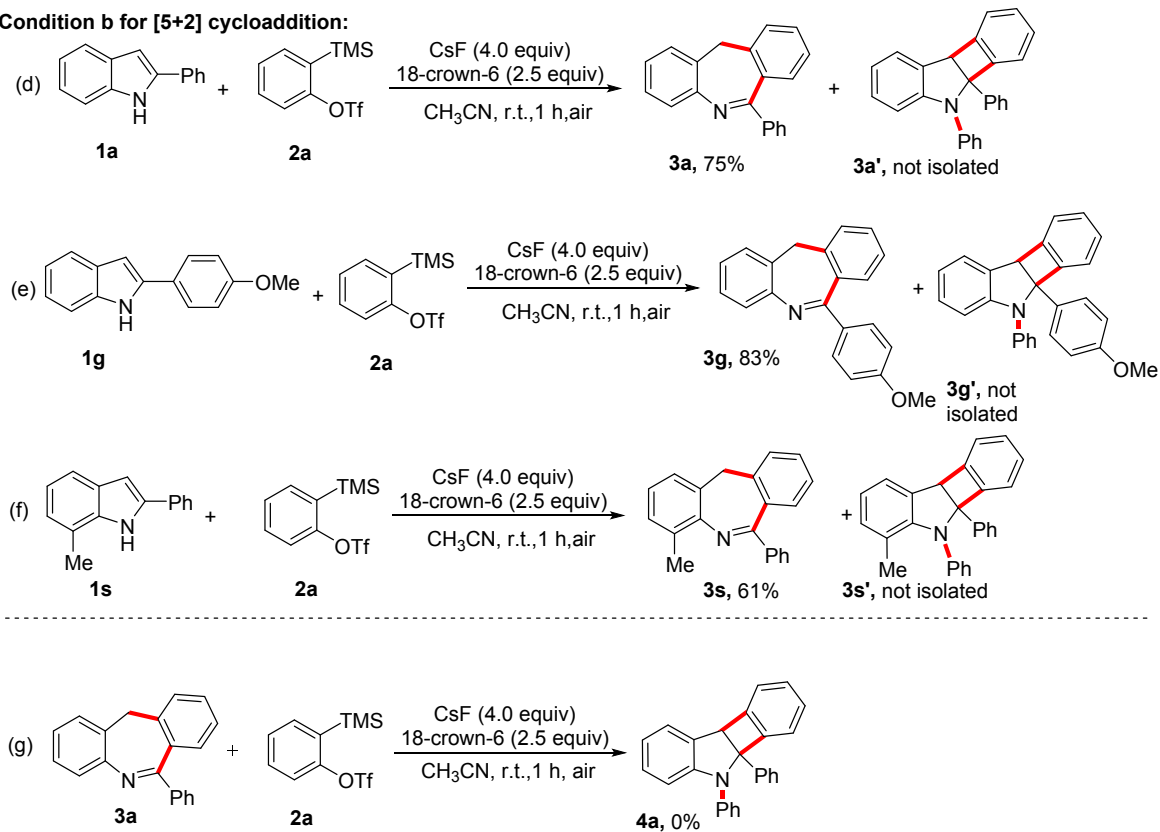

**Scheme S2** Conditional controlled experiments.



#### 4. Gram-scale Synthesis of 3a

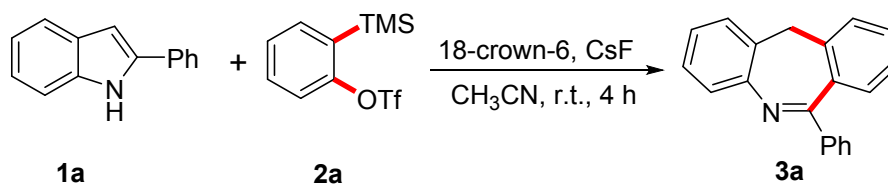

In a 50 mL oven-dried quartz equipped with a magnetic stirrer bar was charged with 2-phenyl-1*H*-indole (**1a**, 1.16 g, 6.0 mmol), CsF (3.64 g, 24.0 mmol), 2-(trimethylsilyl)phenyltrifluoromethanesulfonate (**2a**, 4.47 g, 15.0 mmol) and 18-crown-6 (3.96 g, 15.0 mmol). Then freshly distilled acetonitrile (20 mL) was added to the resulted mixture. The reaction was stirred under room temperature for 4 h. After that, the mixture in reaction tube was detected by TLC. The crude product was purified by flash chromatography (silica gel, petroleum ether/ethyl acetate = 20:1 to 100:1), affording the desired product **3a** as a pale green solid (1.02 g, 63% yield).

#### 5. Characterization Data for the Products

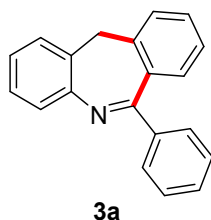

**6-Phenyl-11*H*-dibenzo[*b,e*]azepine (**3a**)**<sup>[3]</sup>: Pale green solid; 40.9 mg, 76% yield; m.p.: 150~152 °C; <sup>1</sup>H NMR (600 MHz, CDCl<sub>3</sub>) δ: 7.85 (d, *J* = 7.2 Hz, 2H), 7.48–7.42 (m, 3H), 7.40 (d, *J* = 7.8 Hz, 2H), 7.33 (d, *J* = 7.2 Hz, 1H), 7.26–7.22 (m, 3H), 7.18 (t, *J* = 7.2 Hz, 1H), 7.13 (t, *J* = 7.8 Hz, 1H), 3.70 (dd, *J* = 33.0, 12.6 Hz, 2H). <sup>13</sup>C NMR (150 MHz, CDCl<sub>3</sub>) δ: 166.96, 145.66, 143.61, 141.08, 132.86, 131.56, 131.05, 130.11, 129.84, 129.78, 128.10, 126.94, 126.92, 126.37, 126.03, 125.66, 125.53, 39.20. HRMS (ESI) calcd for C<sub>20</sub>H<sub>16</sub>N [M+H]<sup>+</sup> 270.1277, found 270.1275.

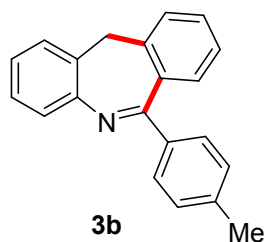

**6-(*p*-Tolyl)-11*H*-dibenzo[*b,e*]azepine (3b):** Pale green solid; 41.9 mg, 74% yield; m.p.: 132~134 °C; <sup>1</sup>H NMR (600 MHz, CDCl<sub>3</sub>) δ 7.75 (d, *J* = 7.8 Hz, 2H), 7.41-7.37 (m, 2H), 7.33 (d, *J* = 7.8 Hz, 1H), 7.25 (s, 2H), 7.24 (s, 2H), 7.22 (d, *J* = 7.8 Hz, 1H), 7.18 (t, *J* = 7.8 Hz, 1H), 7.12 (td, *J* = 7.2, 1.2 Hz, 1H), 3.69 (dd, *J* = 36.0, 13.2 Hz, 2H), 2.42 (s, 3H). <sup>13</sup>C NMR (150 MHz, CDCl<sub>3</sub>) δ 166.79, 145.84, 143.65, 140.36, 138.36, 132.92, 131.66, 130.94, 129.89, 129.78, 128.82, 126.90, 126.32, 125.82, 125.62, 125.49, 39.25, 21.40. HRMS (ESI) calcd for C<sub>21</sub>H<sub>18</sub>N [M+H]<sup>+</sup> 284.1434, found 284.1434.

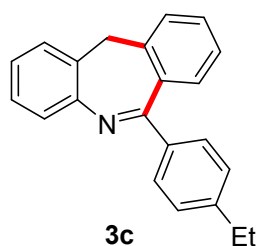

**6-(4-Ethylphenyl)-11*H*-dibenzo[*b,e*]azepine (3c):** Pale green liquid; 46.9 mg, 79% yield; <sup>1</sup>H NMR (600 MHz, CDCl<sub>3</sub>) δ 7.69 (dd, *J* = 7.8, 1.8 Hz, 2H), 7.31 (t, *J* = 7.8 Hz, 2H), 7.24 (d, *J* = 7.8 Hz, 1H), 7.18 (t, *J* = 7.2 Hz, 3H), 7.14 (t, *J* = 7.8 Hz, 2H), 7.10 (t, *J* = 7.2 Hz, 1H), 7.03 (t, *J* = 7.2 Hz, 1H), 3.60 (dd, *J* = 36.6, 13.2 Hz, 2H), 2.63 (q, *J* = 7.2 Hz, 2H), 1.19 (td, *J* = 7.8, 1.8 Hz, 3H). <sup>13</sup>C NMR (151 MHz, CDCl<sub>3</sub>) δ 166.77, 146.65, 145.85, 143.62, 138.58, 132.88, 131.64, 130.92, 129.89, 129.84, 127.62, 126.88, 126.30, 125.80, 125.60, 125.49, 39.23, 28.76, 15.41. HRMS (ESI) calcd for C<sub>22</sub>H<sub>20</sub>N [M+H]<sup>+</sup> 298.1590, found 298.1589.

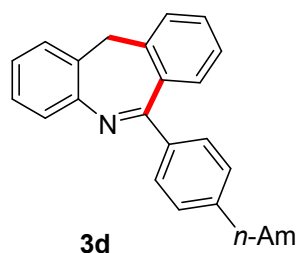

**6-(4-Pentylphenyl)-11H-dibenzo[*b,e*]azepine (3d):** Pale green liquid; 48.8 mg, 72% yield;  $^1\text{H}$  NMR (600 MHz,  $\text{CDCl}_3$ )  $\delta$  7.77 (d,  $J = 7.8$  Hz, 2H), 7.42–7.38 (m, 2H), 7.33 (d,  $J = 7.8$  Hz, 1H), 7.27 (s, 1H), 7.25 (d,  $J = 7.8$  Hz, 3H), 7.22 (d,  $J = 7.8$  Hz, 1H), 7.19 (t,  $J = 7.2$  Hz, 1H), 7.12 (t,  $J = 7.4$  Hz, 1H), 3.70 (q,  $J = 12.6$  Hz, 2H), 2.67 (t,  $J = 7.8$  Hz, 2H), 1.69–1.64 (m, 2H), 1.35 (d,  $J = 3.6$  Hz, 4H), 0.91 (t,  $J = 6.6$  Hz, 3H).  $^{13}\text{C}$  NMR (151 MHz,  $\text{CDCl}_3$ )  $\delta$  166.86, 145.81, 145.42, 143.60, 138.52, 132.89, 131.62, 130.94, 129.93, 129.74, 128.20, 126.88, 126.31, 125.81, 125.61, 125.48, 39.22, 35.79, 31.45, 31.01, 22.53, 14.03. HRMS (ESI) calcd for  $\text{C}_{25}\text{H}_{26}\text{N}$   $[\text{M}+\text{H}]^+$  340.2060, found 340.2061.

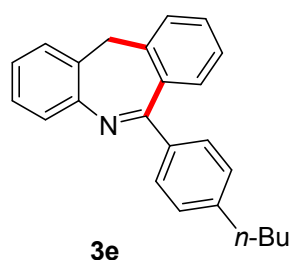

**6-(4-Butylphenyl)-11H-dibenzo[*b,e*]azepine (3e):** Pale green liquid; 48.1 mg, 74% yield;  $^1\text{H}$  NMR (600 MHz,  $\text{CDCl}_3$ )  $\delta$  7.76 (d,  $J = 7.8$  Hz, 2H), 7.41–7.37 (m, 2H), 7.32 (d,  $J = 7.8$  Hz, 1H), 7.25 (t,  $J = 7.2$  Hz, 4H), 7.21 (d,  $J = 7.8$  Hz, 1H), 7.18 (t,  $J = 7.8$  Hz, 1H), 7.11 (t,  $J = 7.2$  Hz, 1H), 3.69 (dd,  $J = 36.0, 12.6$  Hz, 2H), 2.68 (t,  $J = 7.8$  Hz, 2H), 1.66–1.61 (m, 2H), 1.38 (dd,  $J = 15.0, 7.8$  Hz, 2H), 0.94 (t,  $J = 7.8$  Hz, 3H).  $^{13}\text{C}$  NMR (150 MHz,  $\text{CDCl}_3$ )  $\delta$  166.90, 145.88, 145.44, 143.66, 138.58, 132.94, 131.68, 131.00, 129.98, 129.81, 128.26, 126.94, 126.37, 125.87, 125.67, 125.54, 39.28, 35.58, 33.53, 22.39, 14.01. HRMS (ESI) calcd for  $\text{C}_{24}\text{H}_{24}\text{N}$   $[\text{M}+\text{H}]^+$  326.1903, found 326.1900.

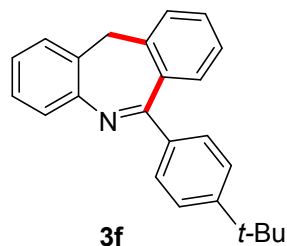

**6-(4-(*tert*-Butyl)phenyl)-11*H*-dibenzo[*b,e*]azepine (3f):** Pale green liquid; 50.1 mg, 77% yield;  $^1\text{H}$  NMR (600 MHz,  $\text{CDCl}_3$ )  $\delta$  7.71 (d,  $J = 7.8$  Hz, 2H), 7.39 (d,  $J = 7.8$  Hz, 2H), 7.33 (dd,  $J = 15.0, 7.2$  Hz, 2H), 7.26 (d,  $J = 7.8$  Hz, 1H), 7.21 (d,  $J = 7.8$  Hz, 1H), 7.17 (d,  $J = 7.8$  Hz, 1H), 7.13 (dd,  $J = 18.6, 7.8$  Hz, 2H), 7.05 (t,  $J = 7.2$  Hz, 1H), 3.62 (q,  $J = 30.0, 12.6$  Hz, 2H), 1.29 (s, 9H).  $^{13}\text{C}$  NMR (151 MHz,  $\text{CDCl}_3$ )  $\delta$  166.73, 153.47, 148.76, 147.99, 145.85, 143.60, 142.90, 139.47, 138.39, 132.86, 130.94, 130.24, 130.20, 130.17, 129.94, 129.89, 129.53, 129.30, 128.91, 128.86, 128.81, 128.66, 128.43, 128.26, 128.24, 127.29, 126.88, 126.32, 125.81, 125.67, 125.61, 125.51, 125.06, 122.83, 39.22, 34.81, 31.25. HRMS (ESI) calcd for  $\text{C}_{24}\text{H}_{24}\text{N}$   $[\text{M}+\text{H}]^+$  326.1903, found 326.1907.

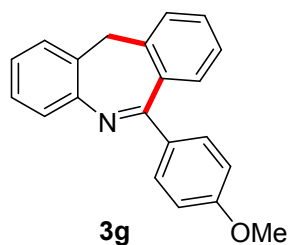

**6-(4-Methoxyphenyl)-11*H*-dibenzo[*b,e*]azepine (3g):** Pale green liquid; 48.5 mg, 81% yield;  $^1\text{H}$  NMR (600 MHz,  $\text{CDCl}_3$ )  $\delta$  7.83 (d,  $J = 7.8$  Hz, 2H), 7.41 (t,  $J = 7.2$  Hz, 1H), 7.37 (d,  $J = 7.8$  Hz, 1H), 7.33 (d,  $J = 7.8$  Hz, 1H), 7.27 (s, 1H), 7.25–7.18 (m, 3H), 7.11 (t,  $J = 7.2$  Hz, 1H), 6.96 (d,  $J = 8.4$  Hz, 2H), 3.88 (s, 3H), 3.70 (dd,  $J = 37.2, 13.2$  Hz, 2H).  $^{13}\text{C}$  NMR (151 MHz,  $\text{CDCl}_3$ )  $\delta$  166.20, 161.33, 145.84, 143.62, 133.62, 132.89, 131.50, 131.37, 130.94, 129.88, 126.89, 126.87, 126.33, 125.65, 125.61, 125.36, 113.42, 55.38, 39.22. HRMS (ESI) calcd for  $\text{C}_{21}\text{H}_{18}\text{NO}$   $[\text{M}+\text{H}]^+$  300.1383, found 300.1382.

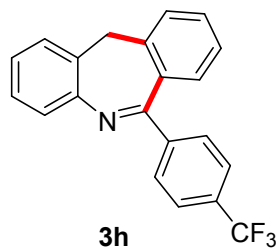

**6-(4-(Trifluoromethyl)phenyl)-11H-dibenzo[*b,e*]azepine (3h):** Pale green liquid; 47.2 mg, 70% yield;  $^1\text{H}$  NMR (600 MHz,  $\text{CDCl}_3$ )  $\delta$  7.97 (d,  $J = 8.4$  Hz, 2H), 7.70 (d,  $J = 8.4$  Hz, 2H), 7.45–7.41 (m, 2H), 7.36 (d,  $J = 7.2$  Hz, 1H), 7.27 (td,  $J = 7.8, 1.2$  Hz, 1H), 7.24 (d,  $J = 7.2$  Hz, 1H), 7.22–7.15 (m, 3H), 3.71 (s, 2H).  $^{13}\text{C}$  NMR (150 MHz,  $\text{CDCl}_3$ )  $\delta$  165.53, 145.34, 144.35, 143.67, 132.69, 131.73 (q,  $J = 32.1$  Hz), 131.43, 131.10, 130.07, 129.46, 127.12, 127.09, 126.76, 126.66, 126.62, 125.87, 125.73, 125.08 (q,  $J = 3.3$  Hz), 124.05 (q,  $J = 270.4$  Hz), 39.18.  $^{19}\text{F}$  NMR (600 MHz,  $\text{CDCl}_3$ )  $\delta$  -62.61. HRMS (ESI) calcd for  $\text{C}_{21}\text{H}_{15}\text{F}_3\text{N}$   $[\text{M}+\text{H}]^+$  338.1151, found 338.1151.

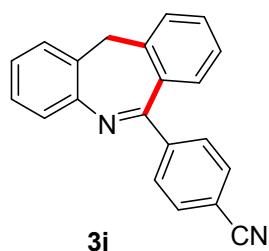

**4-(11H-Dibenzo[*b,e*]azepin-6-yl)benzonitrile (3i):** Pale green liquid; 38.2 mg, 65% yield;  $^1\text{H}$  NMR (600 MHz,  $\text{CDCl}_3$ )  $\delta$  8.02 (d,  $J = 8.4$  Hz, 2H), 7.78 (d,  $J = 8.4$  Hz, 2H), 7.49 (t,  $J = 7.2$  Hz, 1H), 7.44 (d,  $J = 7.8$  Hz, 1H), 7.41 (d,  $J = 7.8$  Hz, 1H), 7.32 (t,  $J = 7.2$  Hz, 1H), 7.30–7.27 (m, 2H), 7.25–7.22 (m, 1H), 7.20 (d,  $J = 7.8$  Hz, 1H), 3.75 (s, 2H).  $^{13}\text{C}$  NMR (150 MHz,  $\text{CDCl}_3$ )  $\delta$  165.02, 145.26, 145.12, 143.78, 132.64, 131.98, 131.62, 130.78, 130.33, 129.25, 127.22, 127.19, 126.93, 126.83, 125.97, 125.83, 118.66, 113.50, 39.20. HRMS (ESI) calcd for  $\text{C}_{21}\text{H}_{15}\text{N}_2$   $[\text{M}+\text{H}]^+$  295.1230, found 295.1231.

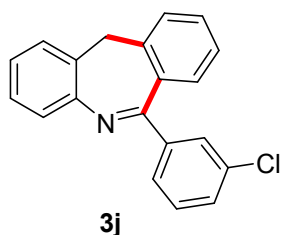

**6-(3-Chlorophenyl)-11H-dibenzo[*b,e*]azepine (3j):** Pale green liquid; 41.2 mg, 68% yield; <sup>1</sup>H NMR (600 MHz, CDCl<sub>3</sub>) δ 7.90 (t, *J* = 1.8 Hz, 1H), 7.69 (dt, dd, *J* = 7.8, 1.2 Hz, 1H), 7.45–7.42 (m, 2H), 7.39 (dd, *J* = 7.8, 0.6 Hz, 1H), 7.36 (q, *J* = 7.8 Hz, 2H), 7.28–7.26 (m, 1H), 7.24–7.21 (m, 3H), 7.15 (td, *J* = 7.2, 1.2 Hz, 1H), 3.70 (s, 2H). <sup>13</sup>C NMR (150 MHz, CDCl<sub>3</sub>) δ 165.45, 145.42, 143.65, 142.92, 134.33, 132.74, 131.33, 131.11, 130.08, 129.65, 129.55, 129.33, 128.06, 127.05, 126.58, 126.42, 125.86, 125.67, 39.20. HRMS (ESI) calcd for C<sub>20</sub>H<sub>15</sub>ClN [M+H]<sup>+</sup> 304.0888, found 304.0886.

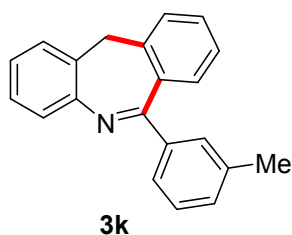

**6-(*m*-Tolyl)-11H-dibenzo[*b,e*]azepine (3k):** Pale solid; 41.9 mg, 74% yield; m.p.: 138~140 °C; <sup>1</sup>H NMR (600 MHz, CDCl<sub>3</sub>) δ 7.73 (s, 1H), 7.56 (d, *J* = 7.2 Hz, 1H), 7.39 (t, *J* = 8.4 Hz, 2H), 7.31 (t, *J* = 7.8 Hz, 2H), 7.27 (d, *J* = 7.8 Hz, 1H), 7.23 (dd, *J* = 18.0, 8.4 Hz, 3H), 7.17 (t, *J* = 7.2 Hz, 1H), 7.11 (t, *J* = 7.2 Hz, 1H), 3.70 (dd, *J* = 35.4, 13.2 Hz, 2H), 2.41 (s, 3H). <sup>13</sup>C NMR (151 MHz, CDCl<sub>3</sub>) δ 167.17, 145.82, 143.65, 141.19, 137.88, 132.93, 131.77, 131.04, 130.97, 130.19, 129.94, 128.00, 127.29, 126.97, 126.37, 126.02, 125.70, 125.62, 39.29, 21.50. HRMS (ESI) calcd for C<sub>21</sub>H<sub>18</sub>N [M+H]<sup>+</sup> 284.1434, found 284.1436.

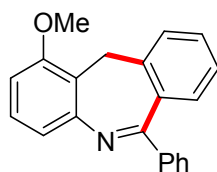

**3l**

**1-Methoxy-6-phenyl-11H-dibenzo[*b,e*]azepine (3l):** White solid; 31.1 mg, 52% yield; m.p.: 151~153 °C; <sup>1</sup>H NMR (600 MHz, CDCl<sub>3</sub>) δ 7.86 (d, *J* = 8.4 Hz, 2H), 7.49–7.42 (m, 3H), 7.41–7.37 (m, 2H), 7.23 (d, *J* = 7.2 Hz, 1H), 7.20–7.15 (m, 2H), 7.04 (d, *J* = 8.4 Hz, 1H), 6.74 (d, *J* = 7.8 Hz, 1H), 4.41 (d, *J* = 13.2 Hz, 1H), 3.89 (s, 3H), 3.20 (d, *J* = 13.2 Hz, 1H). <sup>13</sup>C NMR (150 MHz, CDCl<sub>3</sub>) δ 167.18, 155.29, 147.11, 144.06, 141.14, 132.13, 130.92, 130.12, 129.87, 129.70, 128.11, 126.65, 126.43, 125.51, 121.57, 118.02, 107.75, 56.04, 29.46. HRMS (ESI) calcd for C<sub>21</sub>H<sub>18</sub>NO [M+H]<sup>+</sup> 300.1383, found 300.1382.

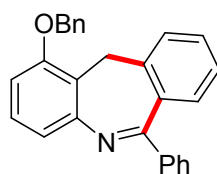

**3m**

**1-(Benzyloxy)-6-phenyl-11H-dibenzo[*b,e*]azepine (3m):** White solid; 42.0 mg, 56% yield; m.p.: 151~153 °C; <sup>1</sup>H NMR (600 MHz, CDCl<sub>3</sub>) δ 7.85 (d, *J* = 7.2 Hz, 2H), 7.51 (d, *J* = 7.8 Hz, 2H), 7.47–7.43 (m, 5H), 7.41–7.35 (m, 2H), 7.34 (d, *J* = 7.8 Hz, 1H), 7.23 (d, *J* = 7.8 Hz, 1H), 7.18 (t, *J* = 7.2 Hz, 1H), 7.14 (t, *J* = 7.8 Hz, 1H), 7.04 (d, *J* = 7.8 Hz, 1H), 6.79 (d, *J* = 8.4 Hz, 1H), 5.11 (d, *J* = 3.0 Hz, 2H), 4.47 (d, *J* = 13.2 Hz, 1H), 3.20 (d, *J* = 13.2 Hz, 1H). <sup>13</sup>C NMR (150 MHz, CDCl<sub>3</sub>) δ 167.21, 154.40, 147.22, 143.98, 141.08, 137.44, 132.10, 130.93, 130.13, 129.86, 129.72, 128.60, 128.09, 127.88, 127.31, 126.60, 126.45, 125.53, 121.99, 118.30, 109.24, 70.74, 29.69. HRMS (ESI) calcd for C<sub>27</sub>H<sub>22</sub>NO [M+H]<sup>+</sup> 376.1696, found 376.1699.

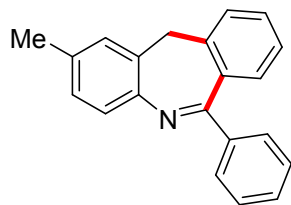

**3n**

**2-Methyl-6-phenyl-11H-dibenzo[*b,e*]azepine (3n):** White solid; 39.6 mg, 70% yield; m.p.: 147~149 °C; <sup>1</sup>H NMR (600 MHz, CDCl<sub>3</sub>) δ 7.84 (d, *J* = 7.2 Hz, 2H), 7.44 (t, *J* = 7.2 Hz, 2H), 7.42–7.39 (m, 1H), 7.33 (d, *J* = 7.8 Hz, 1H), 7.29 (d, *J* = 7.8 Hz, 1H), 7.22 (d, *J* = 7.8 Hz, 1H), 7.18 (t, *J* = 7.2 Hz, 1H), 7.05 (t, *J* = 7.8 Hz, 2H), 3.67 (dd, *J* = 45.6, 12.6 Hz, 2H), 2.32 (s, 3H). <sup>13</sup>C NMR (151 MHz, CDCl<sub>3</sub>) δ 166.44, 143.57, 143.43, 141.32, 135.95, 132.62, 131.75, 131.02, 129.99, 129.89, 129.78, 128.13, 127.76, 127.61, 126.39, 125.65, 125.61, 39.31, 20.97. HRMS (ESI) calcd for C<sub>21</sub>H<sub>18</sub>N [M+H]<sup>+</sup> 284.1434, found 284.1433.

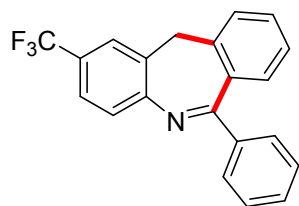

**3o**

**6-Phenyl-2-(trifluoromethyl)-11H-dibenzo[*b,e*]azepine (3o):** White solid; 42.5 mg, 63% yield; m.p.: 141~143 °C; <sup>1</sup>H NMR (600 MHz, CDCl<sub>3</sub>) δ 7.85 (d, *J* = 7.2 Hz, 2H), 7.51-7.48 (m, 7H), 7.36 (d, *J* = 7.8 Hz, 1H), 7.26-7.23 (m, 2H), 3.74 (q, *J* = 13.2 Hz, 2H). <sup>13</sup>C NMR (151 MHz, CDCl<sub>3</sub>) δ 168.61, 148.45, 143.06, 140.50, 133.17, 131.51, 131.37, 130.69, 129.96, 129.92, 128.23, 127.55 (q, *J* = 32.2 Hz), 126.57, 126.14, 125.61, 124.34 (q, *J* = 270 Hz), 123.98 (q, *J* = 3.6 Hz), 38.90. <sup>19</sup>F NMR (565 MHz, CDCl<sub>3</sub>) δ -61.74. HRMS (ESI) calcd for C<sub>21</sub>H<sub>15</sub>F<sub>3</sub>N [M+H]<sup>+</sup> 338.1151, found 338.1149.



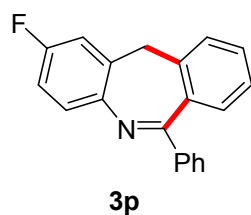

**2-Fluoro-6-phenyl-11H-dibenzo[*b,e*]azepine (3p):** White solid; 35.0 mg, 61% yield; m.p.: 153~155 °C;  $^1\text{H}$  NMR (600 MHz,  $\text{CDCl}_3$ )  $\delta$  7.87–7.81 (m, 2H), 7.50–7.42 (m, 4H), 7.38–7.32 (m, 2H), 7.26–7.21 (m, 2H), 6.98–6.92 (m, 2H), 3.68 (dd,  $J = 52.2$ , 12.0 Hz, 2H).  $^{13}\text{C}$  NMR (150 MHz,  $\text{CDCl}_3$ )  $\delta$  166.78, 162.12, 160.49, 142.12, 141.89 (d,  $J = 269.0$  Hz), 134.27 (d,  $J = 7.65$  Hz), 131.59, 131.20, 130.19, 129.90, 129.75, 128.16, 127.11 (d,  $J = 8.7$  Hz), 126.49, 125.99, 113.78 (d,  $J = 22.1$  Hz), 113.45 (d,  $J = 22.1$  Hz), 39.13.  $^{19}\text{F}$  NMR (565 MHz,  $\text{CDCl}_3$ )  $\delta$  -117.80. HRMS (ESI) calcd for  $\text{C}_{20}\text{H}_{15}\text{FN}$   $[\text{M}+\text{H}]^+$  288.1183, found 288.1184.

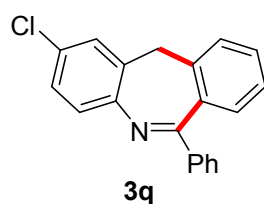

**2-Chloro-6-phenyl-11H-dibenzo[*b,e*]azepine (3q):** White solid; 38.8 mg, 64% yield; m.p.: 145~147 °C;  $^1\text{H}$  NMR (600 MHz,  $\text{CDCl}_3$ )  $\delta$  7.87–7.79 (m, 2H), 7.51–7.40 (m, 4H), 7.32 (dd,  $J = 10.8$ , 7.8 Hz, 2H), 7.25–7.18 (m, 4H), 3.66 (dd,  $J = 48.6$ , 12.6 Hz, 2H).  $^{13}\text{C}$  NMR (150 MHz,  $\text{CDCl}_3$ )  $\delta$  167.42, 144.36, 142.90, 140.82, 134.13, 131.53, 131.40, 131.28, 130.34, 129.90, 129.80, 128.17, 127.01, 126.80, 126.50, 126.01, 38.90. HRMS (ESI) calcd for  $\text{C}_{20}\text{H}_{15}\text{ClN}$   $[\text{M}+\text{H}]^+$  304.0888, found 304.0887.

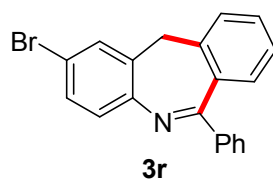

**2-Bromo-6-phenyl-11H-dibenzo[*b,e*]azepine (3r):** White solid; 46.5 mg, 67% yield; m.p.: 158~160 °C; <sup>1</sup>H NMR (600 MHz, CDCl<sub>3</sub>) δ 7.83 (d, *J* = 7.8 Hz, 2H), 7.49 (t, *J* = 7.2 Hz, 1H), 7.45 (t, *J* = 7.2 Hz, 3H), 7.39–7.32 (m, 3H), 7.24 (t, *J* = 5.4 Hz, 3H), 3.67 (dd, *J* = 48.0, 13.2 Hz, 2H). <sup>13</sup>C NMR (150 MHz, CDCl<sub>3</sub>) δ 167.53, 144.82, 142.96, 140.82, 134.55, 131.54, 131.32, 130.39, 129.97, 129.93, 129.83, 129.71, 128.19, 127.13, 126.54, 126.05, 119.39, 38.85. HRMS (ESI) calcd for C<sub>20</sub>H<sub>15</sub>BrN [M+H]<sup>+</sup> 348.0382, found 348.0380.

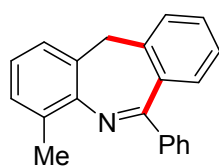

**3s**

**4-Methyl-6-phenyl-11H-dibenzo[*b,e*]azepine (3s):** White solid; 35.7 mg, 63% yield; m.p.: 155~157 °C; <sup>1</sup>H NMR (600 MHz, CDCl<sub>3</sub>) δ 7.87 (d, *J* = 7.2 Hz, 2H), 7.47–7.42 (m, 3H), 7.39 (t, *J* = 7.8 Hz, 1H), 7.32 (d, *J* = 7.8 Hz, 1H), 7.25 (d, *J* = 7.8 Hz, 1H), 7.18 (t, *J* = 7.8 Hz, 1H), 7.08 (dd, *J* = 13.8, 7.2 Hz, 2H), 7.03 (t, *J* = 7.8 Hz, 1H), 3.65 (dd, *J* = 19.8, 13.2 Hz, 2H), 2.53 (s, 3H). <sup>13</sup>C NMR (151 MHz, CDCl<sub>3</sub>) δ 165.38, 144.01, 143.88, 141.39, 133.56, 133.00, 131.57, 130.98, 130.16, 129.79, 129.65, 128.62, 128.19, 126.41, 125.97, 125.69, 124.69, 39.30, 18.73. HRMS (ESI) calcd for C<sub>21</sub>H<sub>18</sub>N [M+H]<sup>+</sup> 284.1434, found 284.1435.

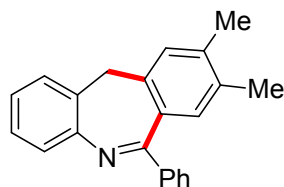

**3t**

**8,9-Dimethyl-6-phenyl-11H-dibenzo[*b,e*]azepine (3t):** White solid; 42.8 mg, 72% yield; m.p.: 161~162 °C; <sup>1</sup>H NMR (600 MHz, CDCl<sub>3</sub>) δ 7.78 (d, *J* = 6.6 Hz, 2H), 7.36 (d, *J* = 7.8 Hz, 3H), 7.29 (d, *J* = 7.2 Hz, 1H), 7.14–7.11 (m, 2H), 7.04–7.00 (m, 2H), 6.90 (s, 1H), 3.55 (dd, *J* = 51.6, 12.0 Hz, 2H), 2.18 (s, 3H), 2.04 (s, 3H). <sup>13</sup>C NMR

(150 MHz, CDCl<sub>3</sub>)  $\delta$  167.06, 145.86, 141.35, 140.10, 133.88, 133.19, 130.73, 129.94, 129.82, 129.35, 128.04, 127.55, 126.79, 126.76, 125.87, 125.53, 38.75, 19.64, 19.23. HRMS (ESI) calcd for C<sub>22</sub>H<sub>20</sub>N [M+H]<sup>+</sup> 298.1590, found 298.1590.

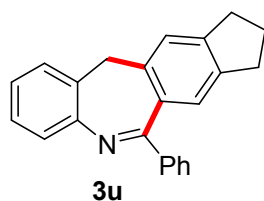

**6-Phenyl-8,9,10,12-tetrahydrobenzo[*b*]indeno[5,6-*e*]azepine (3u):** White solid; 46.4 mg, 75% yield; m.p.: 157~159 °C; <sup>1</sup>H NMR (600 MHz, CDCl<sub>3</sub>)  $\delta$  7.94 (d, *J* = 6.6 Hz, 2H), 7.52 (d, *J* = 6.0 Hz, 3H), 7.47–7.43 (m, 1H), 7.33–7.27 (m, 2H), 7.19 (t, *J* = 7.2 Hz, 1H), 7.13 (d, *J* = 3.0 Hz, 1H), 3.74 (dd, *J* = 46.2, 12.6 Hz, 2H), 3.05–2.89 (m, 3H), 2.79–2.76 (m, 1H), 2.18–2.04 (m, 2H). <sup>13</sup>C NMR (150 MHz, CDCl<sub>3</sub>)  $\delta$  167.37, 147.95, 145.86, 141.97, 141.66, 141.57, 133.24, 129.90, 129.84, 128.03, 126.78, 126.73, 125.85, 125.46, 125.43, 122.20, 77.21, 77.00, 76.79, 39.18, 32.84, 32.31, 25.39. HRMS (ESI) calcd for C<sub>23</sub>H<sub>20</sub>N [M+H]<sup>+</sup> 310.1590, found 310.1593.

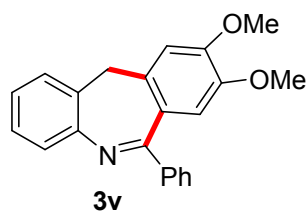

**8,9-Dimethoxy-6-phenyl-11H-dibenzo[*b,e*]azepine (3v):** White solid; 49.4 mg, 75% yield; <sup>1</sup>H NMR (600 MHz, CDCl<sub>3</sub>)  $\delta$  7.88 (d, *J* = 7.8 Hz, 2H), 7.50–7.43 (m, 3H), 7.40 (d, *J* = 7.8 Hz, 1H), 7.27 (d, *J* = 7.2 Hz, 1H), 7.22 (d, *J* = 7.8 Hz, 1H), 7.15 (t, *J* = 7.2 Hz, 1H), 6.82 (s, 1H), 6.72 (s, 1H), 3.95 (s, 3H), 3.71 (d, *J* = 12.6 Hz, 1H), 3.67 (s, 3H), 3.59 (d, *J* = 13.2 Hz, 1H). <sup>13</sup>C NMR (150 MHz, CDCl<sub>3</sub>)  $\delta$  166.40, 151.50, 146.61, 145.77, 141.13, 137.29, 132.97, 130.12, 129.82, 128.12, 126.89, 126.74, 125.93, 125.46, 123.86, 112.80, 109.06, 56.06, 55.94, 38.83. HRMS (ESI) calcd for C<sub>22</sub>H<sub>20</sub>NO<sub>2</sub><sup>+</sup> [M+H]<sup>+</sup> 330.1489, found 330.1491.

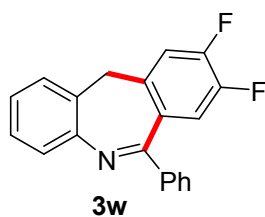

**8,9-Difluoro-6-phenyl-11H-dibenzo[*b,e*]azepine (3w):** White solid; 37.2 mg, 61% yield; m.p.: 153~155 °C; <sup>1</sup>H NMR (600 MHz, CDCl<sub>3</sub>) δ 7.84 (d, *J* = 6.6 Hz, 2H), 7.53–7.45 (m, 3H), 7.40 (d, *J* = 7.8 Hz, 1H), 7.30 (t, *J* = 7.2 Hz, 1H), 7.22 (d, *J* = 7.2 Hz, 1H), 7.20–7.13 (m, 2H), 7.06 (dd, *J* = 10.2, 8.4 Hz, 1H), 3.66 (dd, *J* = 45.6, 13.2 Hz, 2H). <sup>13</sup>C NMR (150 MHz, CDCl<sub>3</sub>) δ 164.68, 151.98 (dd, *J* = 252.2, 12.5 Hz), 148.28 (dd, *J* = 244.1, 14.5 Hz), 145.36, 140.50 (dd, *J* = 5.6, 3.8 Hz), 140.27, 131.96, 130.56, 129.62, 128.35, 127.94, 127.37, 126.96, 126.44, 125.65, 118.58 (d, *J* = 17.8 Hz), 115.15 (d, *J* = 17.3 Hz), 38.33. <sup>19</sup>F NMR (565 MHz, CDCl<sub>3</sub>) δ -129.95 (d, *J* = 22.0 Hz), -133.77 (d, *J* = 22.0 Hz), -139.93 (d, *J* = 20.9 Hz), -140.64 (d, *J* = 21.5 Hz). HRMS (ESI) calcd for C<sub>20</sub>H<sub>14</sub>F<sub>2</sub>N [M+H]<sup>+</sup> 306.1089, found 306.1087.

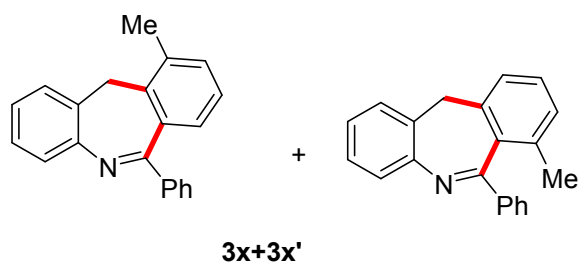

**10-Methyl-6-phenyl-11H-dibenzo[*b,e*]azepine (3x) and 7-Methyl-6-phenyl-11H-dibenzo[*b,e*]azepine (3x'):** Pale green liquid; 39.6 mg, 70% yield; <sup>1</sup>H NMR (600 MHz, CDCl<sub>3</sub>) δ 7.88–7.86 (m, 0.5H), 7.73 (d, *J* = 5.4 Hz, 1.8H), 7.46–7.43 (m, 0.9H), 7.43–7.39 (m, 3.1H), 7.32 (dd, *J* = 7.8, 0.6 Hz, 1.0H), 7.27 (d, *J* = 7.8 Hz, 1.4H), 7.24 (d, *J* = 6.0 Hz, 1.1H), 7.22 (dd, *J* = 7.2, 1.2 Hz, 0.76H), 7.17 (dd, *J* = 13.8, 6.0 Hz, 2H), 7.13 (td, *J* = 7.2, 1.2 Hz, 0.38H), 7.07–7.05 (m, 1.0 H), 7.04 (d, *J* = 1.2 Hz, 0.37H), 7.01 (d, *J* = 7.8 Hz, 1.0 H), 4.01 (d, *J* = 13.2 Hz, 0.25H), 3.62 (d, *J* = 13.2 Hz, 1.0H), 3.56 (d, *J* = 13.2 Hz, 1.0 H), 3.35 (d, *J* = 13.2 Hz, 0.26H), 2.56 (s, 0.77H), 1.87 (s, 3H). <sup>13</sup>C NMR (151 MHz, CDCl<sub>3</sub>) δ 167.89, 167.39, 146.03, 145.99, 145.53, 141.63, 141.56, 141.26, 136.71, 133.33, 133.16, 132.64, 132.44, 131.98, 130.36, 130.08, 130.04, 129.95, 129.77, 129.23, 128.48, 128.10, 128.06, 127.63, 126.93,

126.88, 126.74, 126.61, 125.78, 125.40, 125.33, 125.15, 124.30, 123.47, 39.08, 33.84, 21.89, 20.01. HRMS (ESI) calcd for C<sub>21</sub>H<sub>18</sub>N [M+H]<sup>+</sup> 284.1434, found 284.1433.

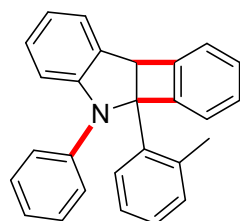

**4a**

**5-Phenyl-4b-(*o*-tolyl)-4b,9b-dihydro-5H-benzo[3,4]cyclobuta[1,2-*b*]indole (4a):**

White solid; 51.0 mg, m.p.: 143~145 °C, 71% yield; <sup>1</sup>H NMR (600 MHz, CDCl<sub>3</sub>) δ 7.43 (d, *J* = 7.8 Hz, 1H), 7.37 (d, *J* = 7.8 Hz, 1H), 7.29 (d, *J* = 7.2 Hz, 1H), 7.24 (d, *J* = 9.0 Hz, 2H), 7.22–7.15 (m, 4H), 7.08 (t, *J* = 7.8 Hz, 3H), 7.03 (t, *J* = 7.8 Hz, 1H), 6.97 (dd, *J* = 7.8, 2.4 Hz, 2H), 6.80 (td, *J* = 7.2, 2.4 Hz, 1H), 6.75 (dd, *J* = 7.8, 2.4 Hz, 1H), 5.00 (s, 1H), 2.32 (d, *J* = 2.4 Hz, 3H). <sup>13</sup>C NMR (151 MHz, CDCl<sub>3</sub>) δ 148.99, 146.01, 143.54, 141.97, 138.46, 138.28, 131.65, 129.84, 129.42, 128.75, 128.03, 127.92, 127.49, 125.13, 124.22, 124.20, 124.17, 123.88, 122.28, 118.89, 110.43, 80.55, 58.96, 20.40. HRMS (ESI) calcd for C<sub>27</sub>H<sub>22</sub>N [M+H]<sup>+</sup> 360.1747, found 360.1746.

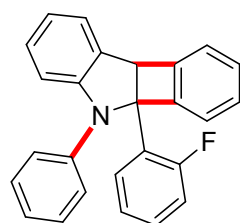

**4b**

**4b-(2-Fluorophenyl)-5-phenyl-4b,9b-dihydro-5H-benzo[3,4]cyclobuta[1,2-**

***b*]indole (4b):** Pale green solid; 55.9 mg, 77% yield; m.p.: 149~151 °C; <sup>1</sup>H NMR (600 MHz, CDCl<sub>3</sub>) δ 7.47 (td, *J* = 7.8, 1.8 Hz, 1H), 7.41 (d, *J* = 7.2 Hz, 1H), 7.35 (d, *J* = 7.2 Hz, 1H), 7.31 (m, 2H), 7.27 (m, 1H), 7.26–7.21 (m, 3H), 7.14–7.11 (m, 2H), 7.10–7.08 (m, 1H), 7.06 (d, *J* = 7.8 Hz, 2H), 7.05–7.02 (m, 1H), 6.83 (t, *J* = 7.2 Hz, 1H), 6.73 (d, *J* = 7.8 Hz, 1H), 5.19 (s, 1H). <sup>13</sup>C NMR (151 MHz, CDCl<sub>3</sub>) δ 161.67 (d,

$J = 249.15$  Hz), 149.33, 146.23, 143.37, 141.90, 130.61 (d,  $J = 3.45$  Hz), 129.73 (d,  $J = 8.1$  Hz), 129.67, 128.83, 128.75, 127.90, 127.83, 127.70, 124.66, 124.33(d,  $J = 5.25$  Hz), 123.44, 123.32(d,  $J = 3.3$  Hz), 122.41, 118.74, 116.03, 115.89, 110.05, 77.45, 60.01.  $^{19}\text{F}$  NMR (565 MHz,  $\text{CDCl}_3$ )  $\delta -112.07$ . HRMS (ESI) calcd for  $\text{C}_{26}\text{H}_{19}\text{FN}$   $[\text{M}+\text{H}]^+$  364.1496, found 364.1493.

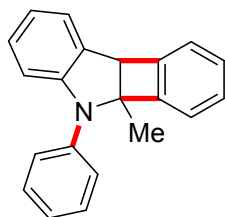

**4c**

**4b-Methyl-5-phenyl-4b,9b-dihydro-5H-benzo[3,4]cyclobuta[1,2-*b*]indole (4c):** Pale green liquid; 46.4 mg, 82% yield;  $^1\text{H}$  NMR (600 MHz,  $\text{CDCl}_3$ )  $\delta$  7.31 (t,  $J = 7.2$  Hz, 2H), 7.25 (d,  $J = 7.2$  Hz, 1H), 7.20 (d,  $J = 7.2$  Hz, 1H), 7.19–7.06 (m, 5H), 6.93 (d,  $J = 6.6$  Hz, 1H), 6.90 (t,  $J = 7.8$  Hz, 1H), 6.61 (t,  $J = 7.2$  Hz, 1H), 6.47 (d,  $J = 7.8$  Hz, 1H), 4.67 (s, 1H), 1.67 (s, 3H).  $^{13}\text{C}$  NMR (150 MHz,  $\text{CDCl}_3$ )  $\delta$  149.90, 147.47, 145.99, 141.58, 129.23, 128.96, 128.66, 127.88, 127.68, 125.64, 124.69, 124.56, 122.07, 121.54, 118.11, 109.02, 74.39, 58.04, 22.35. HRMS (ESI) calcd for  $\text{C}_{21}\text{H}_{18}\text{N}$   $[\text{M}+\text{H}]^+$  284.1434, found 284.1436.

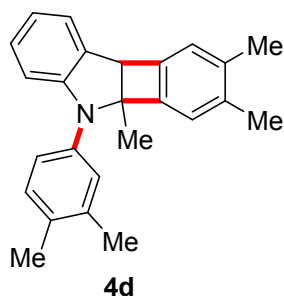

**4d**

**5-(3,4-Dimethylphenyl)-2,3,4b-trimethyl-4b,9b-dihydro-5H-benzo[3,4]cyclobuta[1,2-*b*]indole (4d):** Pale green liquid; 50.2 mg, 74% yield;  $^1\text{H}$  NMR (600 MHz,  $\text{CDCl}_3$ )  $\delta$  7.26 (d,  $J = 7.2$  Hz, 1H), 7.18 (d,  $J = 8.4$  Hz, 1H), 7.15 (s, 1H), 7.09 (d,  $J = 8.4$  Hz, 1H), 7.02 (s, 1H), 6.96 (t,  $J = 7.8$  Hz, 1H), 6.87 (s, 1H), 6.66 (t,  $J = 7.8$  Hz, 1H), 6.50 (d,  $J = 7.8$  Hz, 1H), 4.70 (s, 1H), 2.30 (d,  $J = 3.0$  Hz, 6H),

2.24 (s, 6H), 1.72 (s, 3H).  $^{13}\text{C}$  NMR (151 MHz,  $\text{CDCl}_3$ )  $\delta$  150.19, 145.49, 143.70, 139.12, 137.49, 137.39, 136.13, 133.04, 130.33, 128.85, 127.80, 127.09, 124.39, 123.30, 122.97, 122.60, 117.54, 108.75, 74.14, 57.60, 22.45, 20.52, 20.46, 20.03, 19.37. HRMS (ESI) calcd for  $\text{C}_{25}\text{H}_{26}\text{N}$   $[\text{M}+\text{H}]^+$  340.2060, found 340.2058.

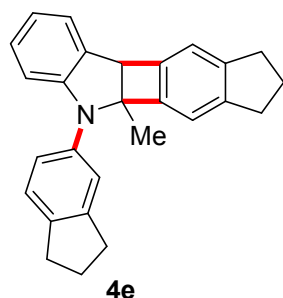

**5-(2,3-Dihydro-1H-inden-5-yl)-4b-methyl-1,2,3,4b,5,9b-**

**hexahydroindeno[5',6':3,4]cyclobuta[1,2-*b*]indole (4e):** Pale green liquid; 50.1 mg, 69% yield;  $^1\text{H}$  NMR (600 MHz,  $\text{CDCl}_3$ )  $\delta$  7.30 (t,  $J = 9.0$  Hz, 3H), 7.15 (d,  $J = 13.2$  Hz, 2H), 7.03–6.98 (m, 2H), 6.69 (t,  $J = 7.2$  Hz, 1H), 6.52 (d,  $J = 7.8$  Hz, 1H), 4.71 (s, 1H), 2.99 (t,  $J = 7.2$  Hz, 4H), 2.94–2.89 (m, 2H), 2.19 (dd,  $J = 15.0, 7.2$  Hz, 2H), 2.06 (dd,  $J = 14.4, 7.2$  Hz, 2H), 1.77 (s, 3H), 1.31 (s, 2H).  $^{13}\text{C}$  NMR (151 MHz,  $\text{CDCl}_3$ )  $\delta$  150.46, 145.58, 145.31, 144.61, 143.76, 143.22, 140.81, 139.67, 128.91, 127.77, 124.77, 124.36, 124.09, 122.25, 118.25, 117.83, 117.48, 108.78, 73.42, 56.87, 33.25, 33.19, 33.06, 32.53, 25.65, 25.30, 22.50. HRMS (ESI) calcd for  $\text{C}_{27}\text{H}_{26}\text{N}$   $[\text{M}+\text{H}]^+$  364.2060, found 364.2063.

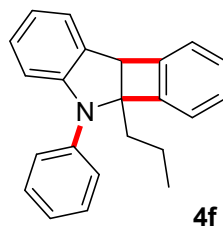

**5-Phenyl-4b-propyl-4b,9b-dihydro-5H-benzo[3,4]cyclobuta[1,2-*b*]indole (4f):** Pale green liquid; 53.5 mg, 86% yield;  $^1\text{H}$  NMR (600 MHz,  $\text{CDCl}_3$ )  $\delta$  7.43 (t,  $J = 7.8$  Hz, 2H), 7.38 (d,  $J = 8.4$  Hz, 2H), 7.32 (d,  $J = 7.2$  Hz, 1H), 7.22 (dd,  $J = 14.4, 7.2$  Hz, 3H), 7.05 (dd,  $J = 7.2, 1.2$  Hz, 1H), 7.01 (t,  $J = 7.8$  Hz, 1H), 6.75–6.70 (m, 1H), 6.62

(d,  $J = 7.8$  Hz, 1H), 4.88 (s, 1H), 2.24–2.19 (m, 1H), 1.97–1.92 (m, 1H), 1.56–1.52 (m, 1H), 1.41–1.34 (m, 1H), 0.90 (t,  $J = 7.2$  Hz, 3H).  $^{13}\text{C}$  NMR (151 MHz,  $\text{CDCl}_3$ )  $\delta$  146.91, 146.38, 129.18, 128.85, 128.66, 127.81, 127.57, 125.50, 124.54, 124.47, 121.83, 121.80, 118.04, 108.87, 78.00, 55.39, 36.72, 18.34, 14.28. HRMS (ESI) calcd for  $\text{C}_{23}\text{H}_{22}\text{N}$   $[\text{M}+\text{H}]^+$  312.1747, found 312.1748.

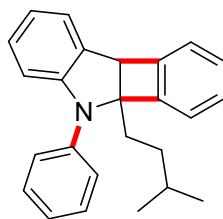

**4g**

**4b-iso-Pentyl-5-phenyl-4b,9b-dihydro-5H-benzo[3,4]cyclobuta[1,2-b]indole (4g):**

Pale green liquid; 56.3 mg, 83% yield;  $^1\text{H}$  NMR (600 MHz,  $\text{CDCl}_3$ )  $\delta$  7.39 (t,  $J = 7.2$  Hz, 2H), 7.34 (d,  $J = 7.8$  Hz, 2H), 7.28 (d,  $J = 7.2$  Hz, 1H), 7.23 (d,  $J = 9.0$  Hz, 1H), 7.20–7.16 (m, 3H), 7.02 (d,  $J = 7.8$  Hz, 1H), 6.98 (t,  $J = 7.2$  Hz, 1H), 6.69 (t,  $J = 7.2$  Hz, 1H), 6.59 (d,  $J = 7.8$  Hz, 1H), 4.82 (s, 1H), 2.23–2.17 (m, 1H), 1.92–1.85 (m, 1H), 1.46–1.42 (m, 1H), 1.40–1.34 (m, 1H), 1.24–1.18 (m, 1H), 0.79 (d,  $J = 6.6$  Hz, 3H), 0.76 (d,  $J = 6.0$  Hz, 3H).  $^{13}\text{C}$  NMR (151 MHz,  $\text{CDCl}_3$ )  $\delta$  150.44, 147.10, 146.35, 141.58, 129.15, 128.85, 128.73, 127.81, 127.60, 125.40, 124.51, 124.49, 121.89, 121.72, 118.04, 108.92, 77.97, 55.23, 33.77, 32.16, 28.16, 22.61, 22.38. HRMS (ESI) calcd for  $\text{C}_{25}\text{H}_{26}\text{N}$   $[\text{M}+\text{H}]^+$  340.2060, found 340.2063.

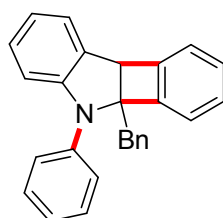

**4h**

**4b-Benzyl-5-phenyl-4b,9b-dihydro-5H-benzo[3,4]cyclobuta[1,2-b]indole (4h):**

Pale green liquid; 38.1 mg, 53% yield;  $^1\text{H}$  NMR (600 MHz,  $\text{CDCl}_3$ )  $\delta$  7.41 (t,  $J = 7.2$  Hz, 3H), 7.35 (d,  $J = 7.8$  Hz, 2H), 7.25–7.19 (m, 4H), 7.17–7.08 (m, 6H), 7.03 (d,  $J =$



6.6 Hz, 2H), 6.97 (t,  $J = 7.8$  Hz, 1H), 6.68 (t,  $J = 7.2$  Hz, 1H), 6.58 (d,  $J = 7.8$  Hz, 1H), 4.88 (s, 1H), 3.50 (d,  $J = 14.4$  Hz, 1H), 3.37 (d,  $J = 14.4$  Hz, 1H).  $^{13}\text{C}$  NMR (151 MHz,  $\text{CDCl}_3$ )  $\delta$  150.08, 146.27, 146.00, 141.48, 137.14, 129.75, 129.26, 129.07, 128.45, 127.92, 127.80, 127.60, 126.16, 125.62, 124.66, 124.48, 122.01, 121.79, 118.21, 108.89, 77.68, 54.87, 40.55. HRMS (ESI) calcd for  $\text{C}_{27}\text{H}_{22}\text{N}$   $[\text{M}+\text{H}]^+$  360.1747, found 360.1748.

## 6. References

- [1] Y. Yin, W. Ma, Z. Chai and G. Zhao, *J. Org. Chem.*, 2007, **72**, 5731.
- [2] A.-T. Biju and F. Glorius, *Angew. Chem. Int. Ed.*, 2010, **49**, 9761.
- [3] B. Balakrishna, A. Bauzá, A. Frontera and A. Vidal-Ferran, *Chem.–Eur. J.*, 2016, **22**, 10607.

## 7. $^1\text{H}$ and $^{13}\text{C}$ NMR Spectra of the Products

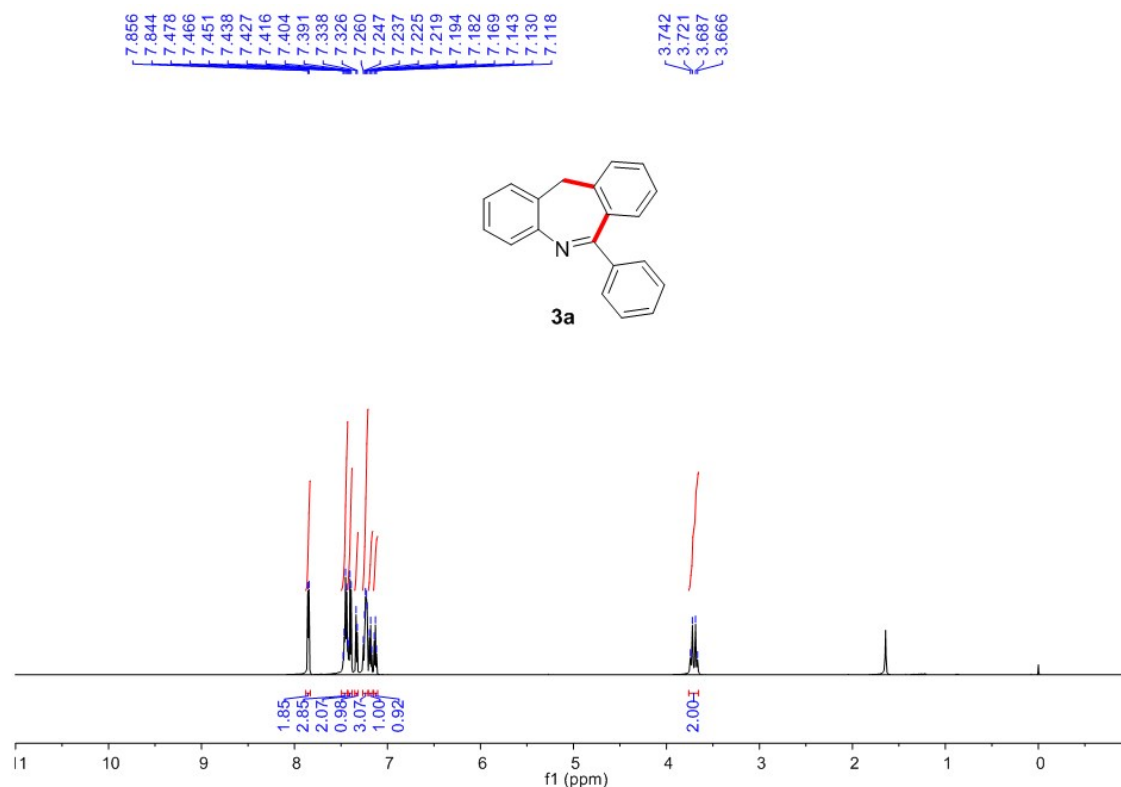

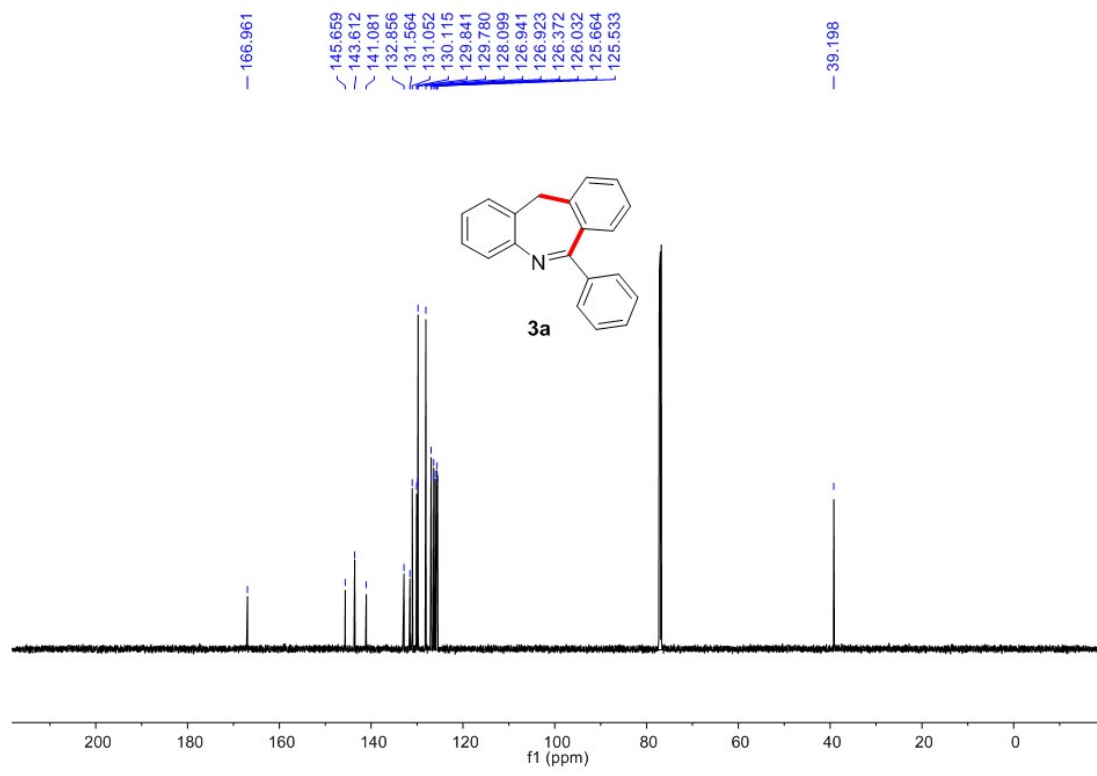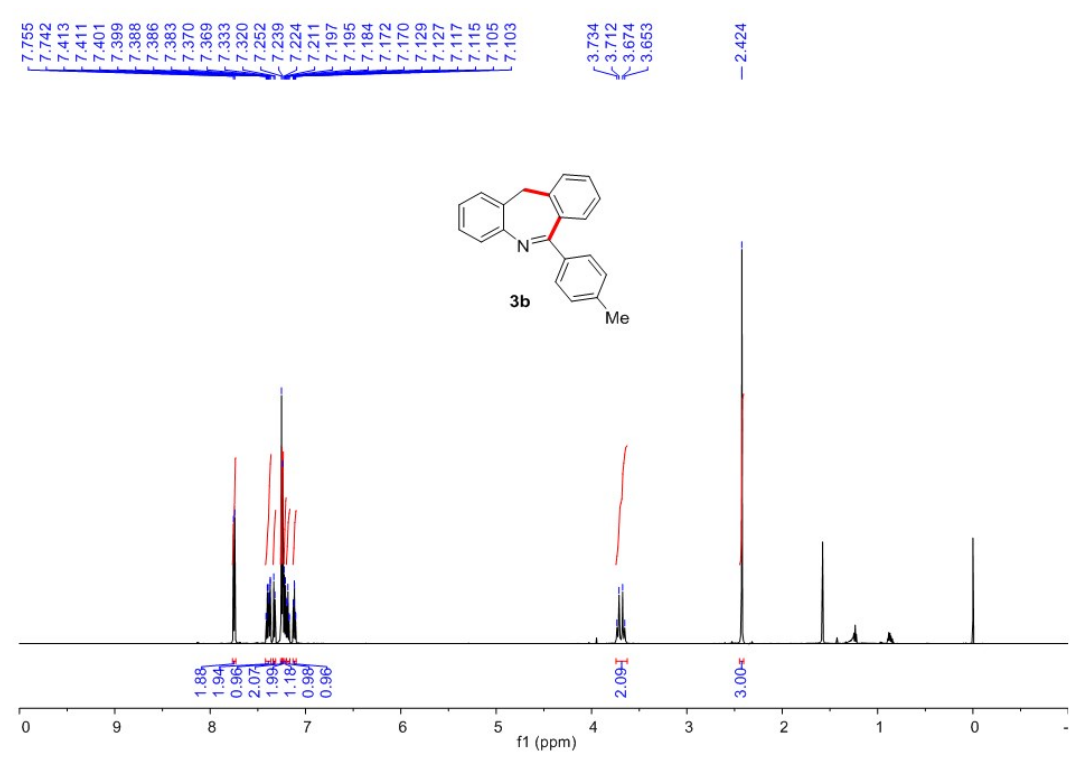

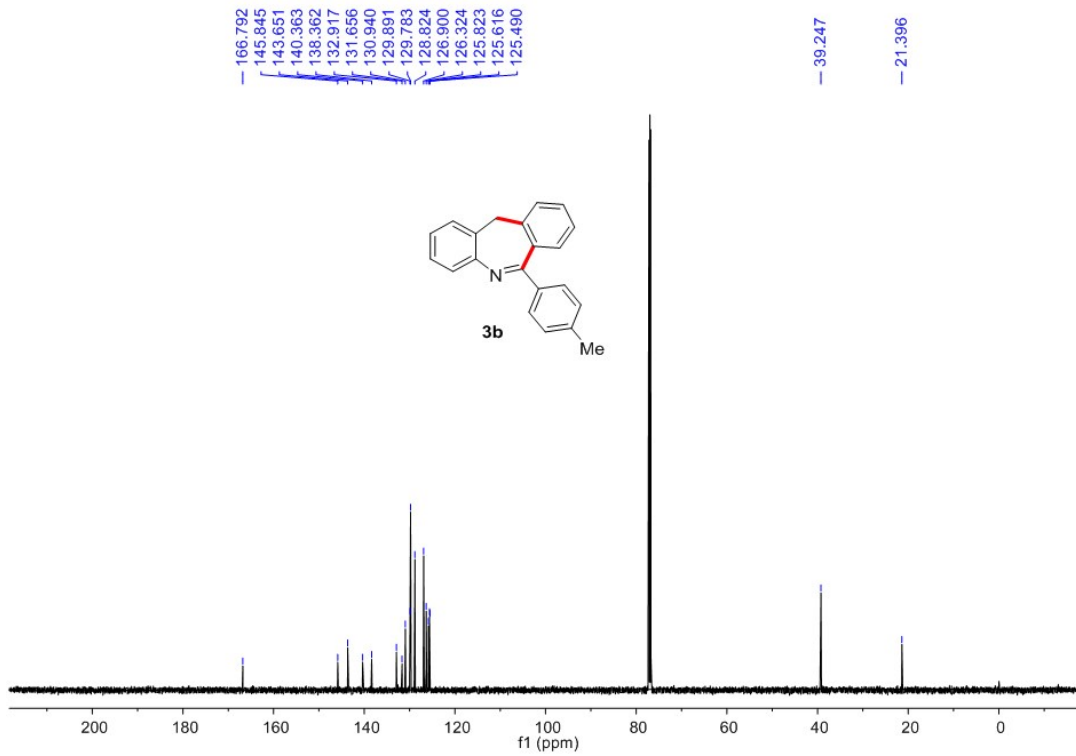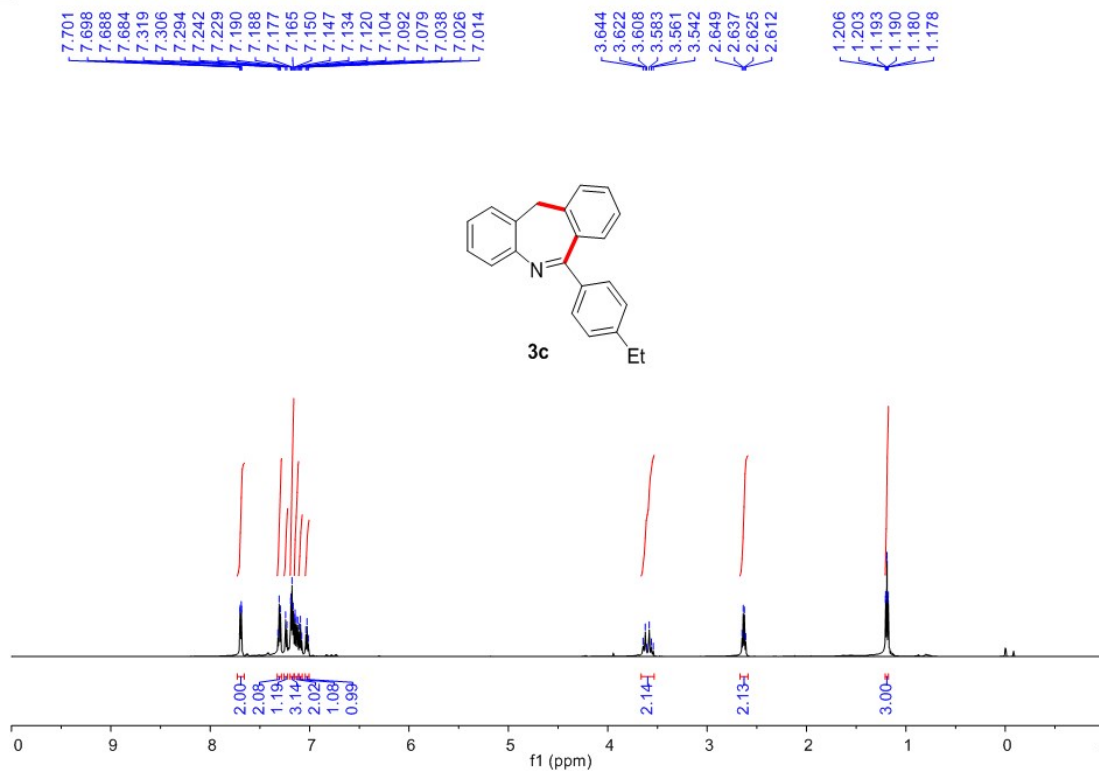

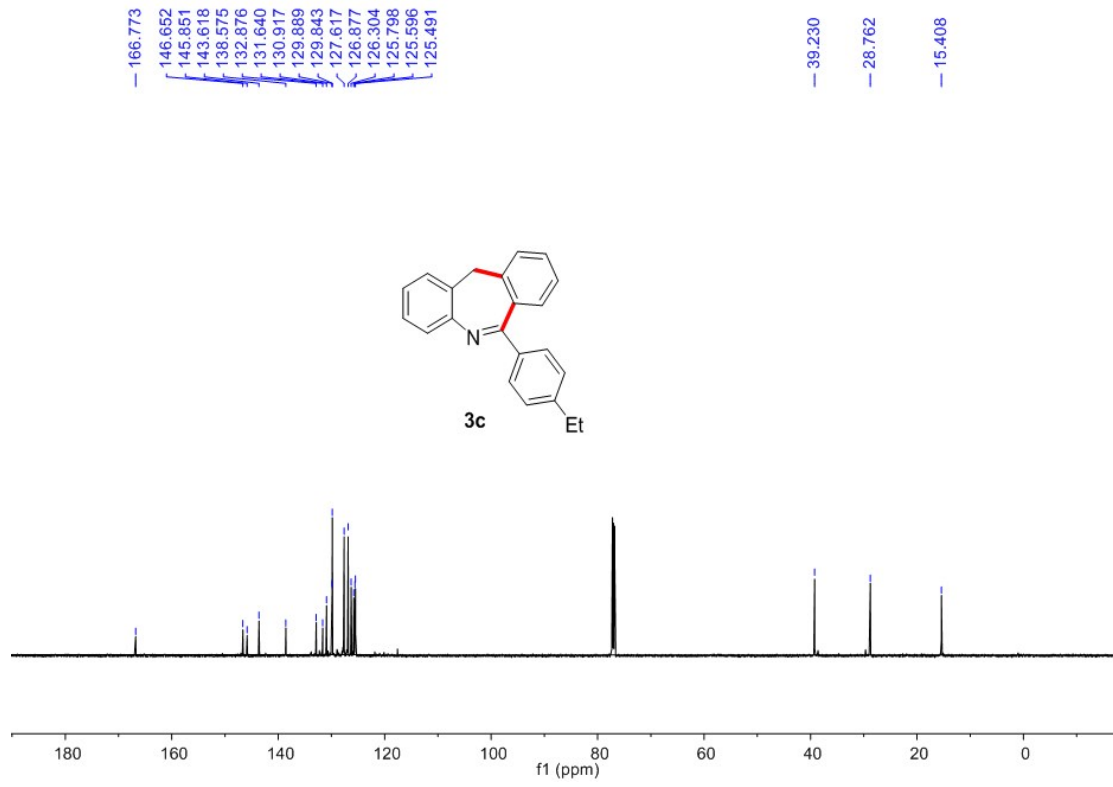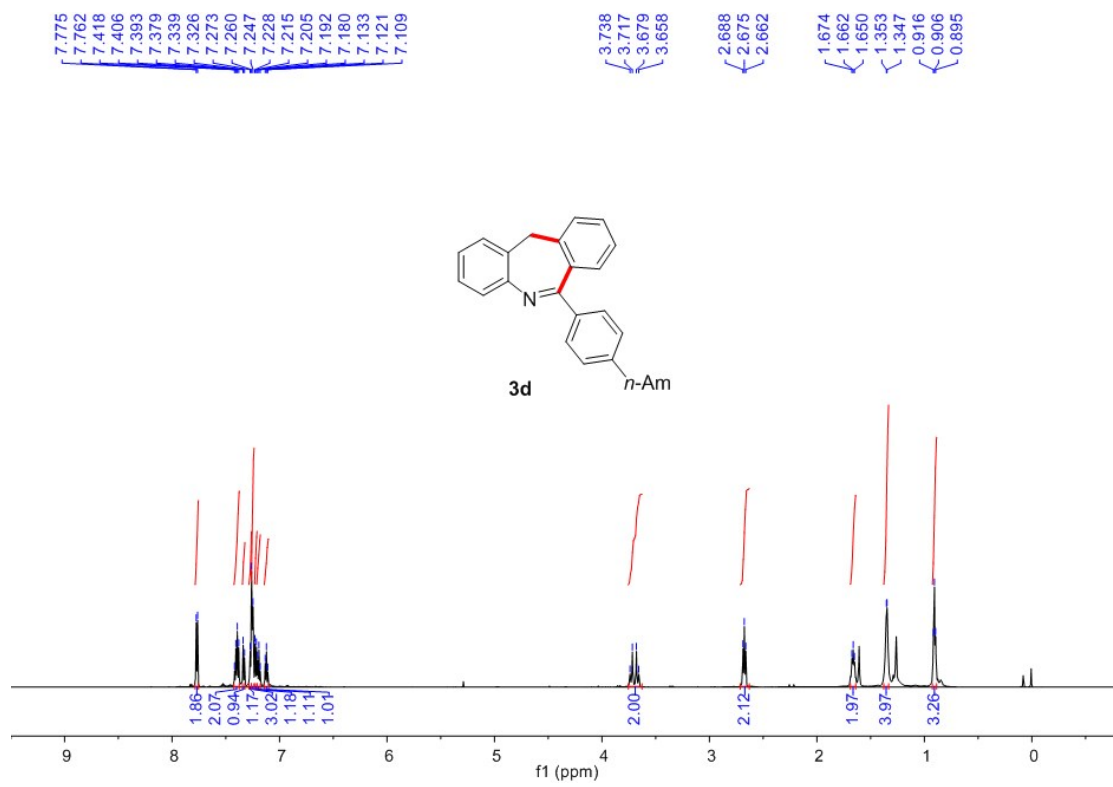

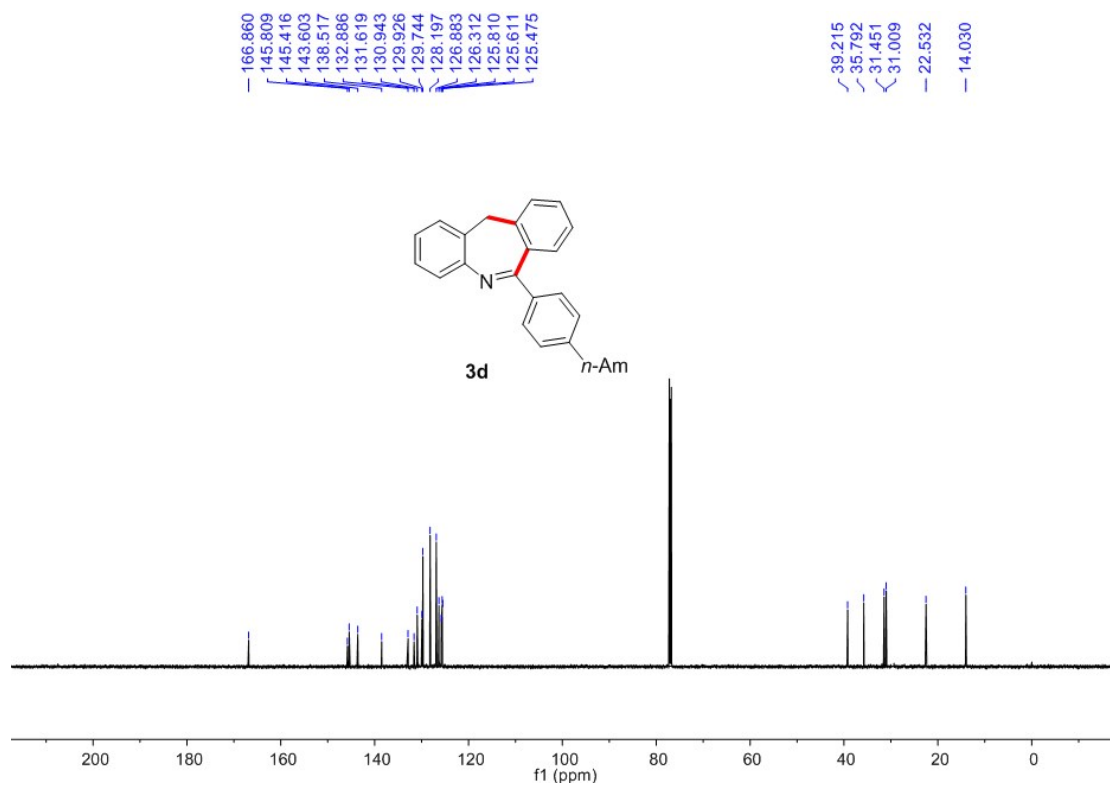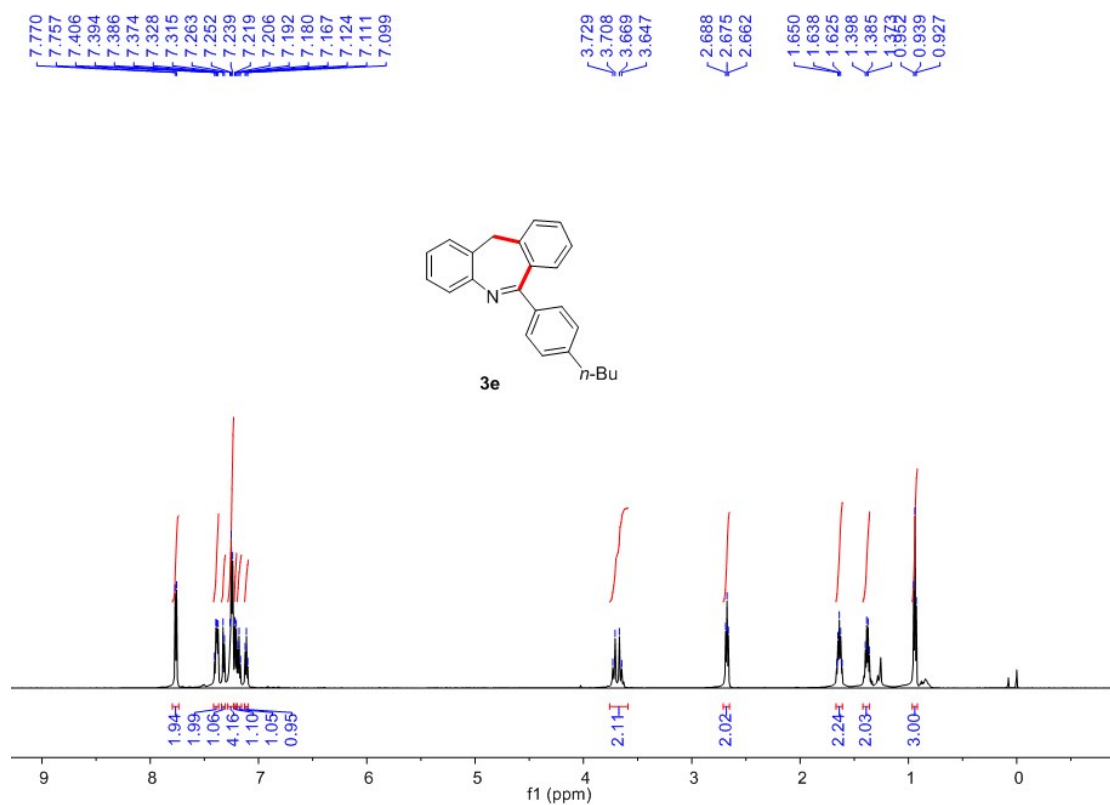

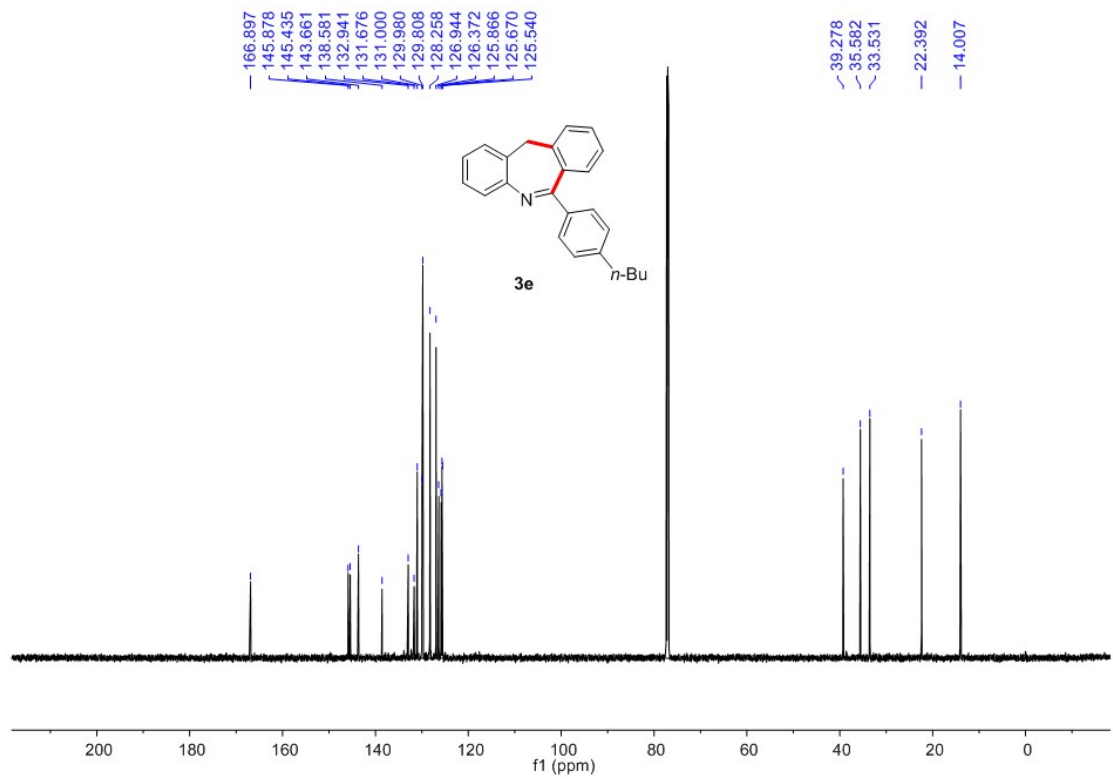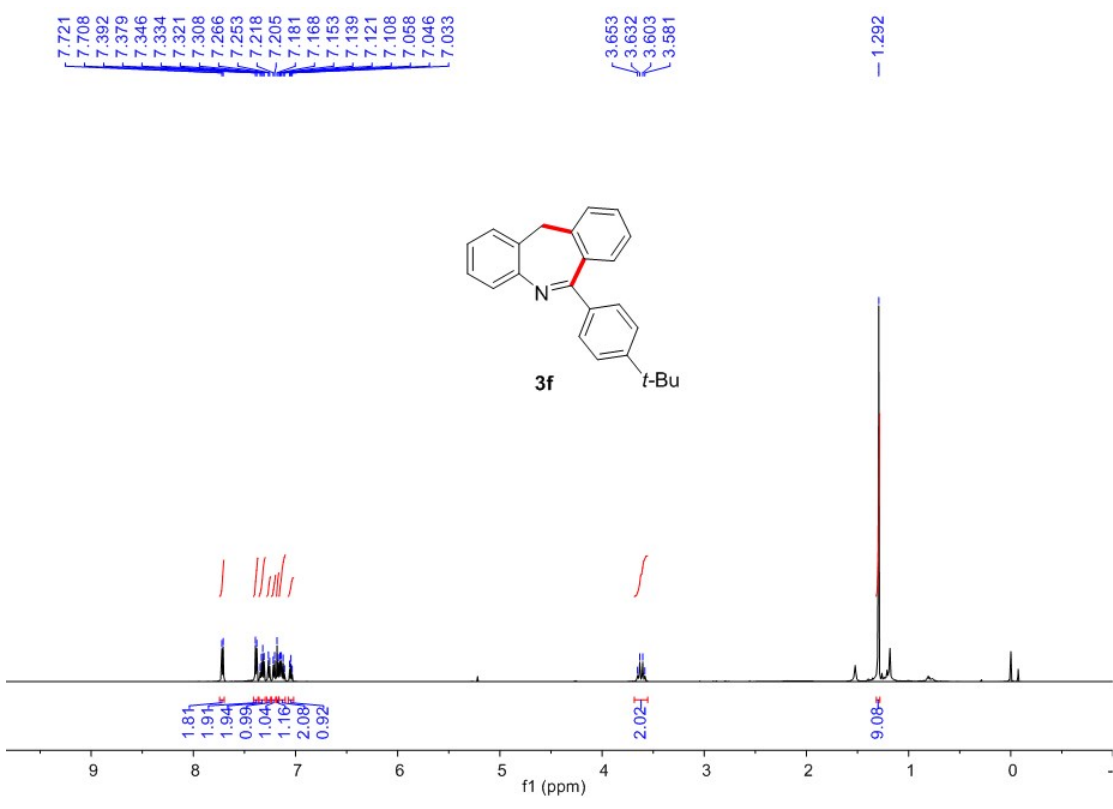

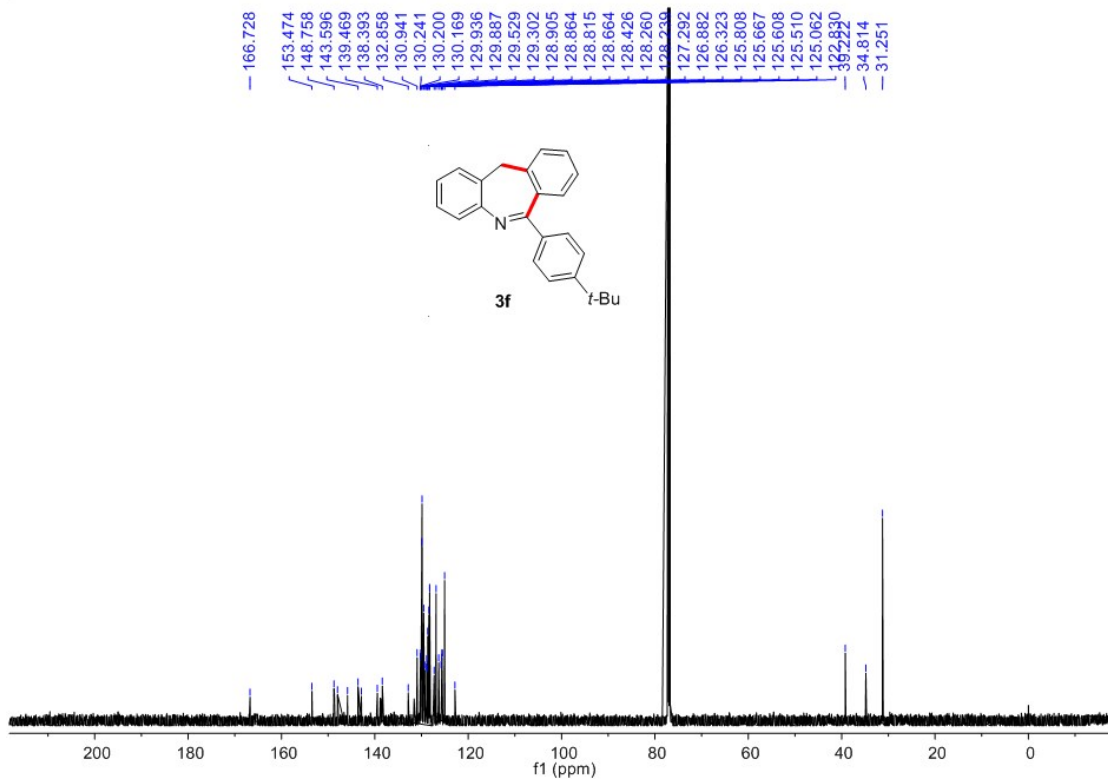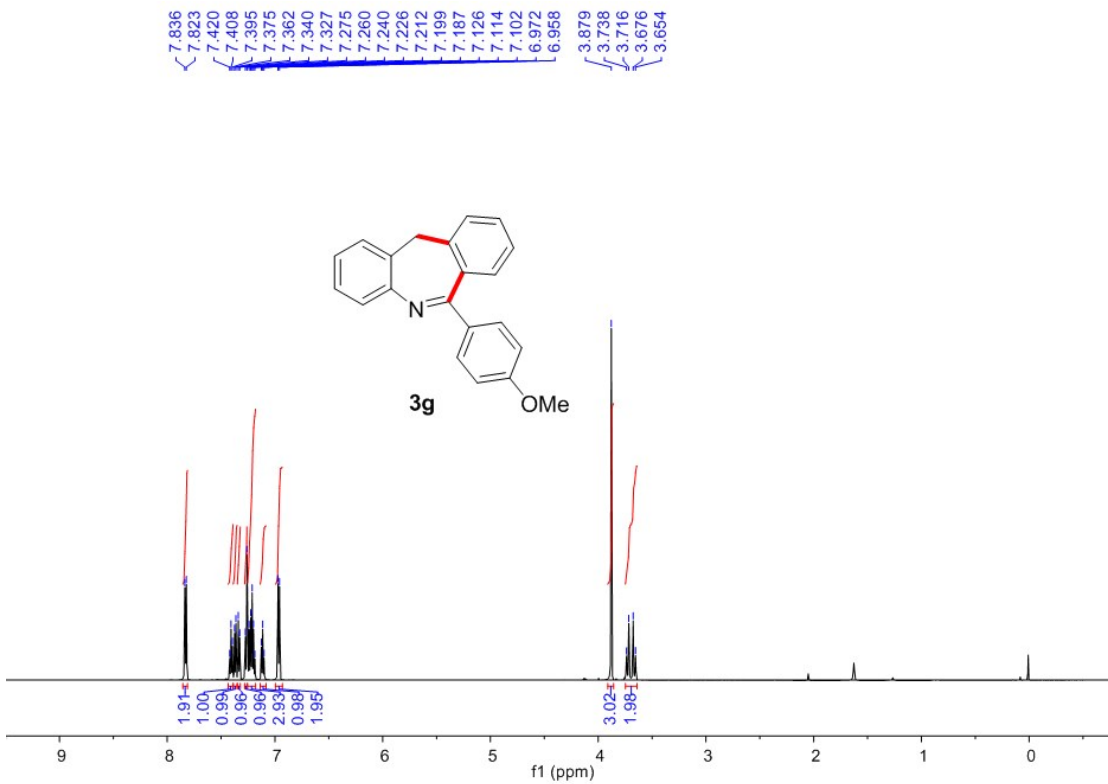

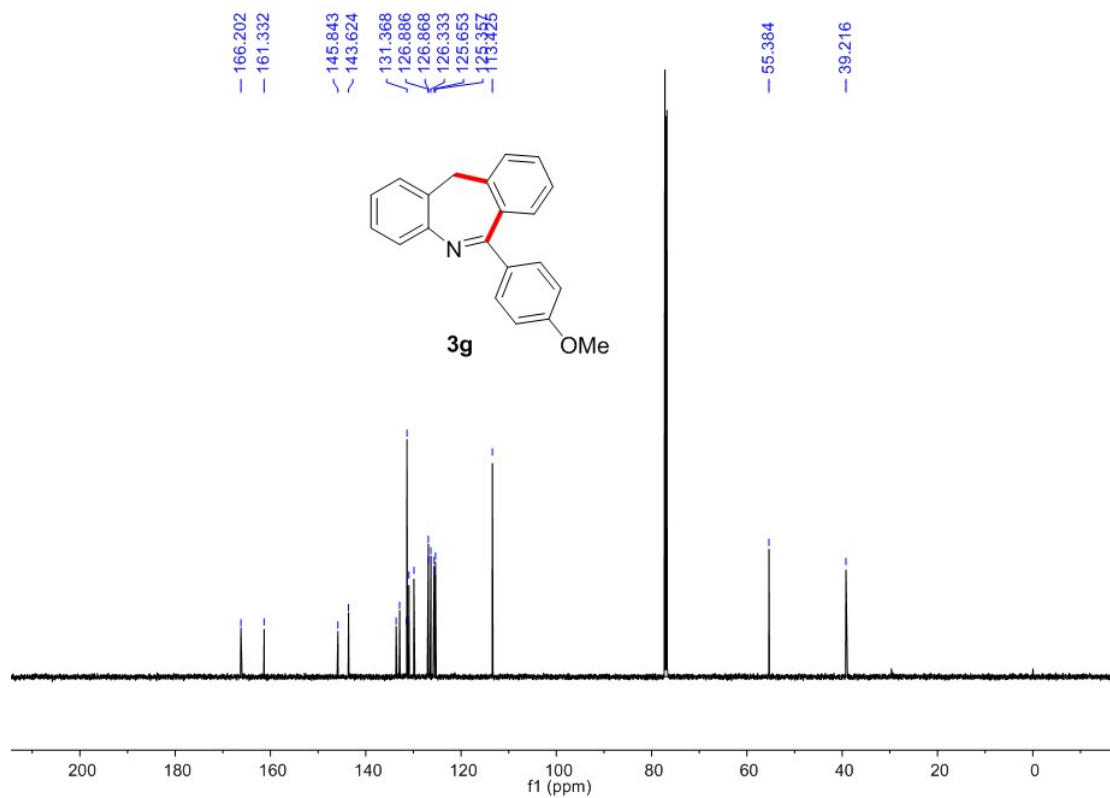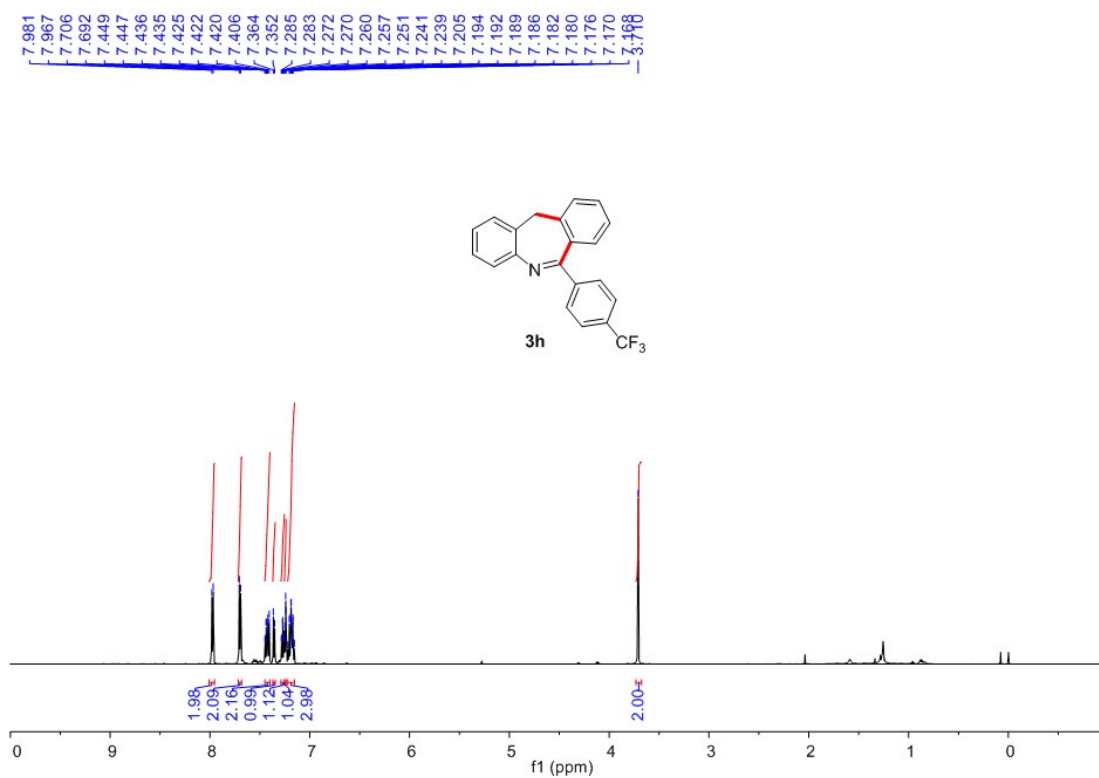



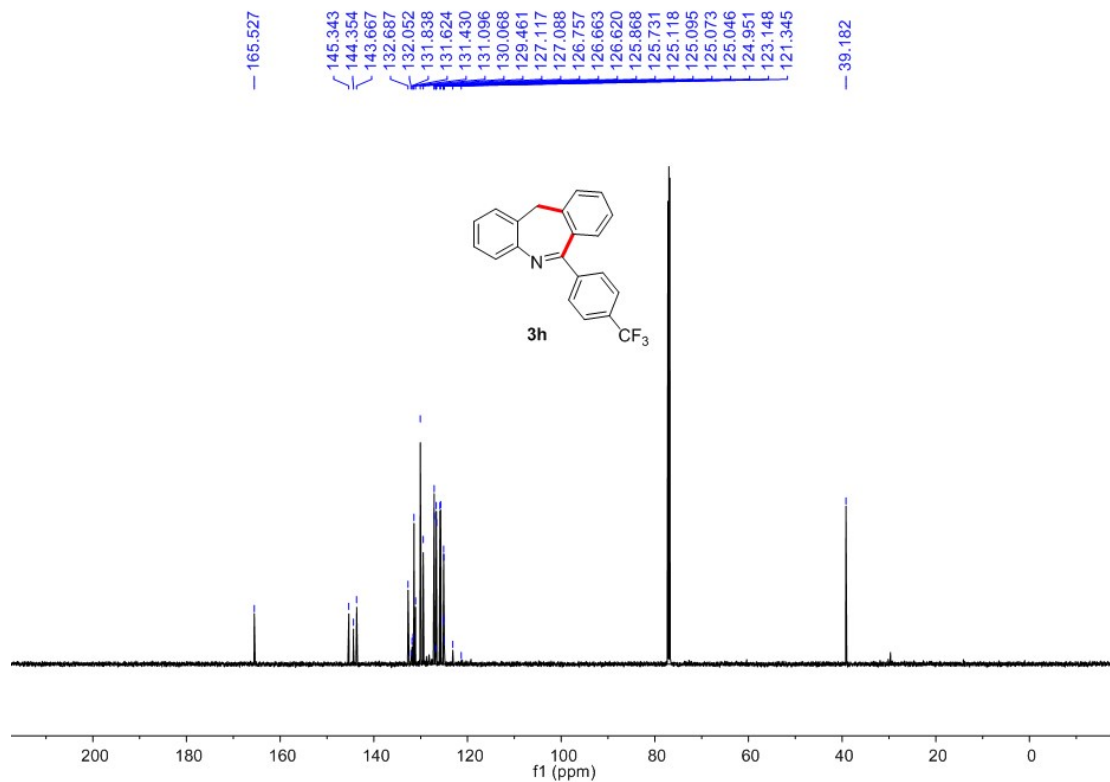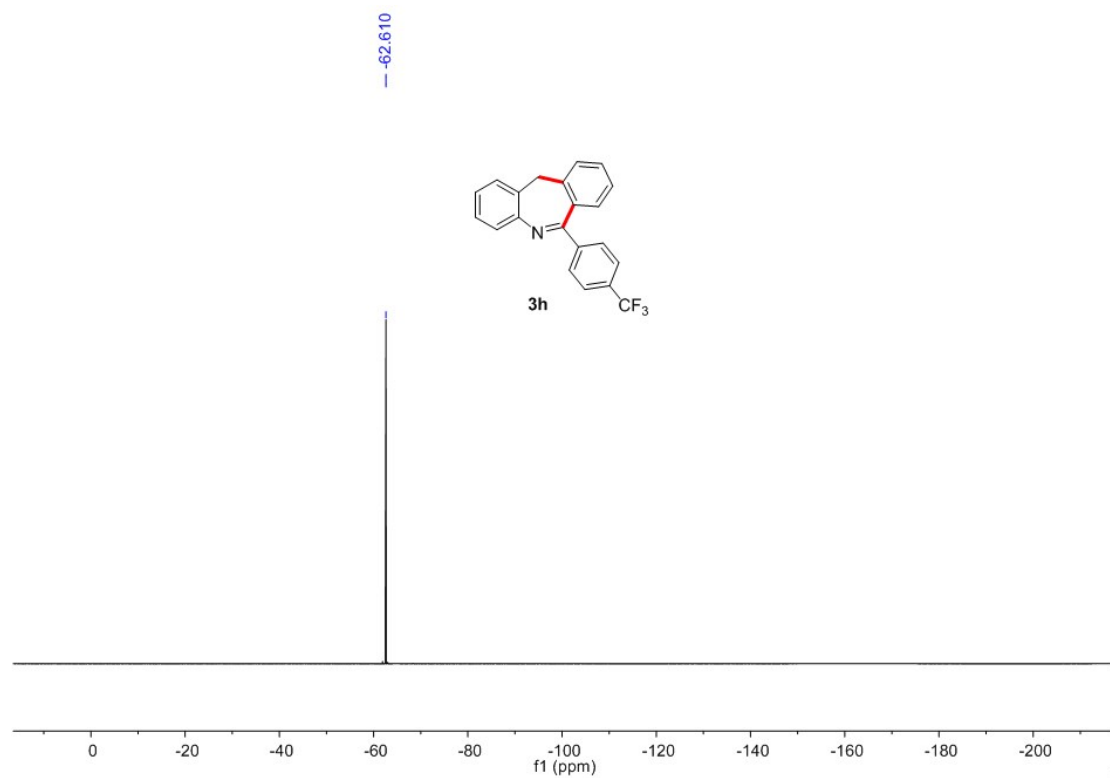

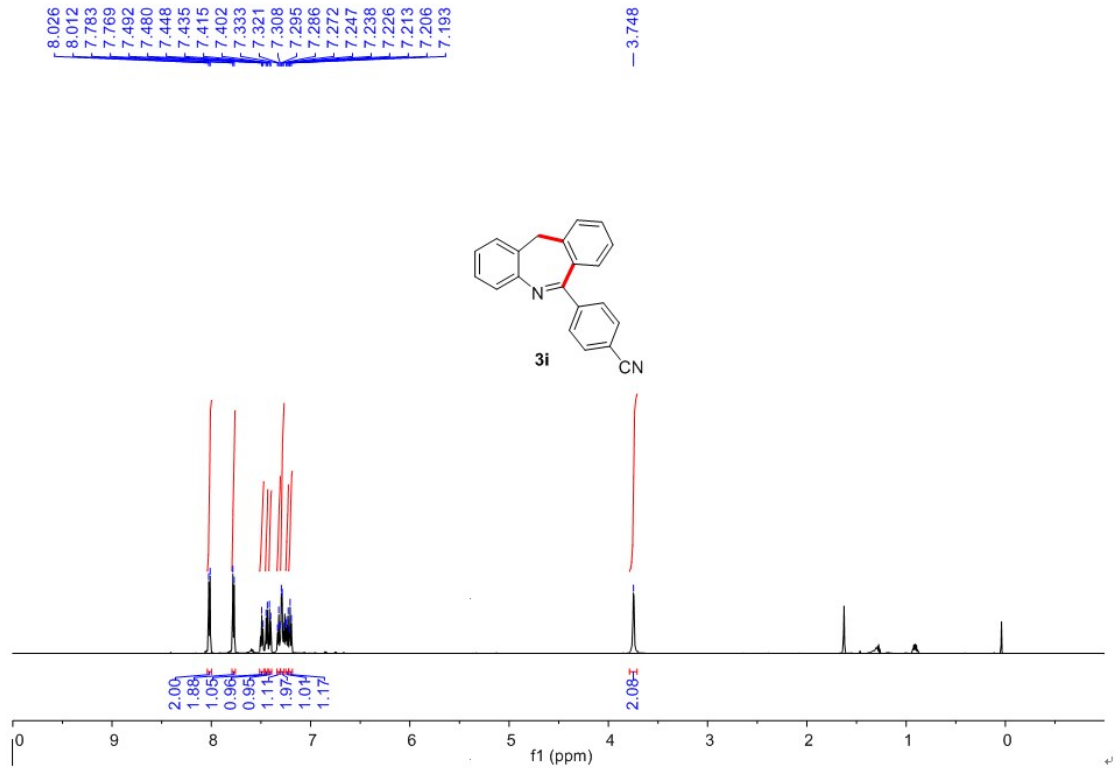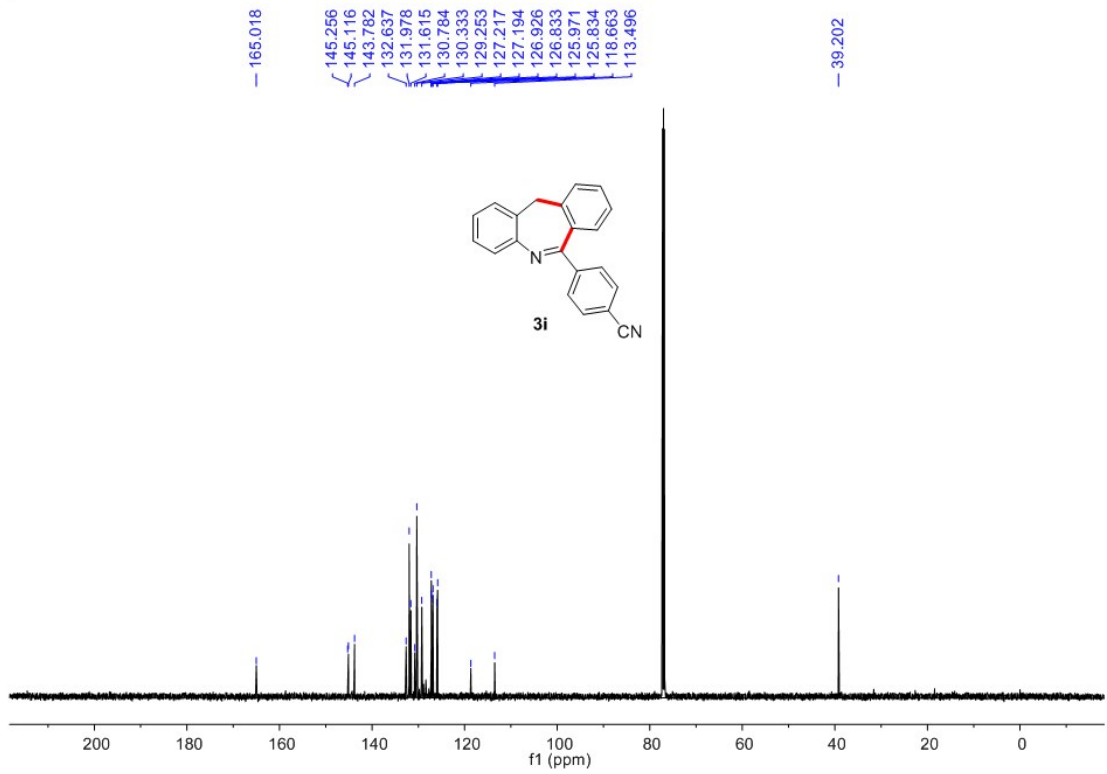

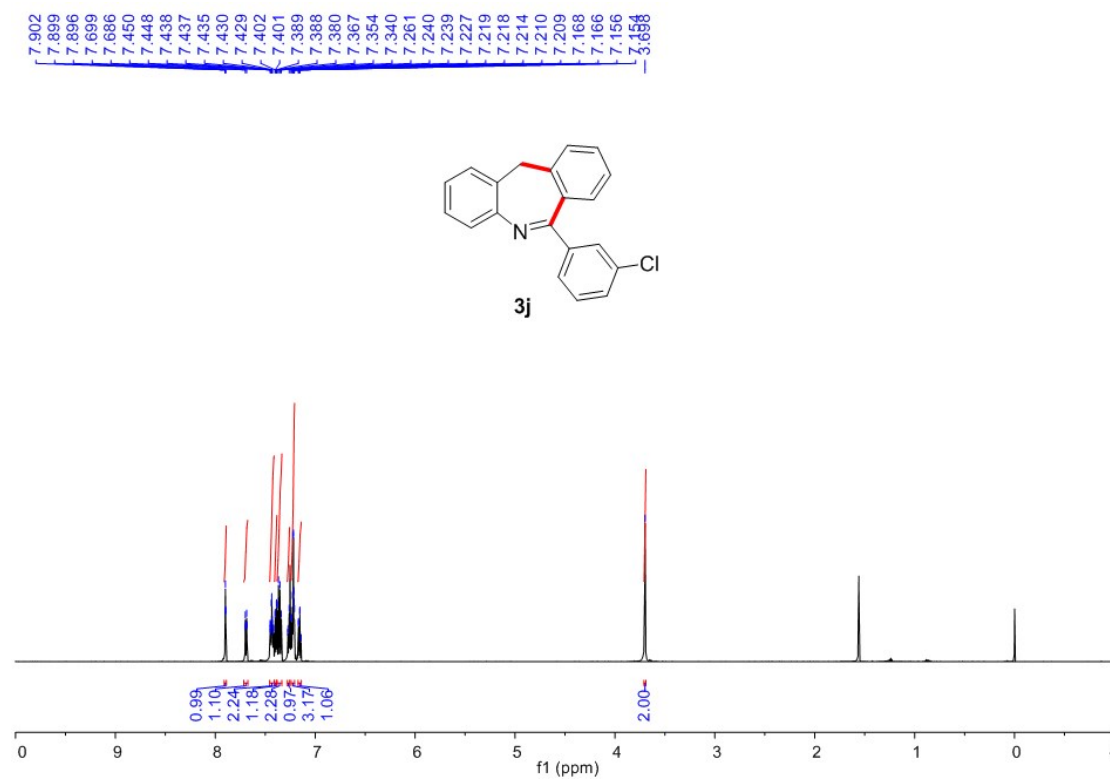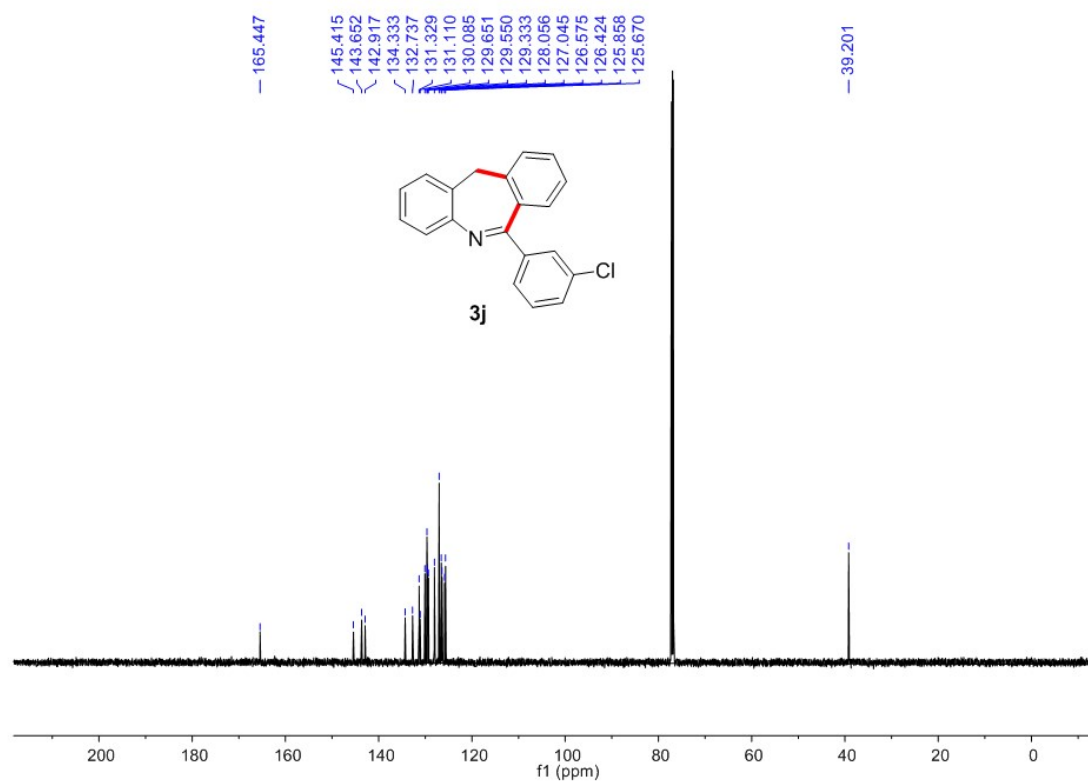

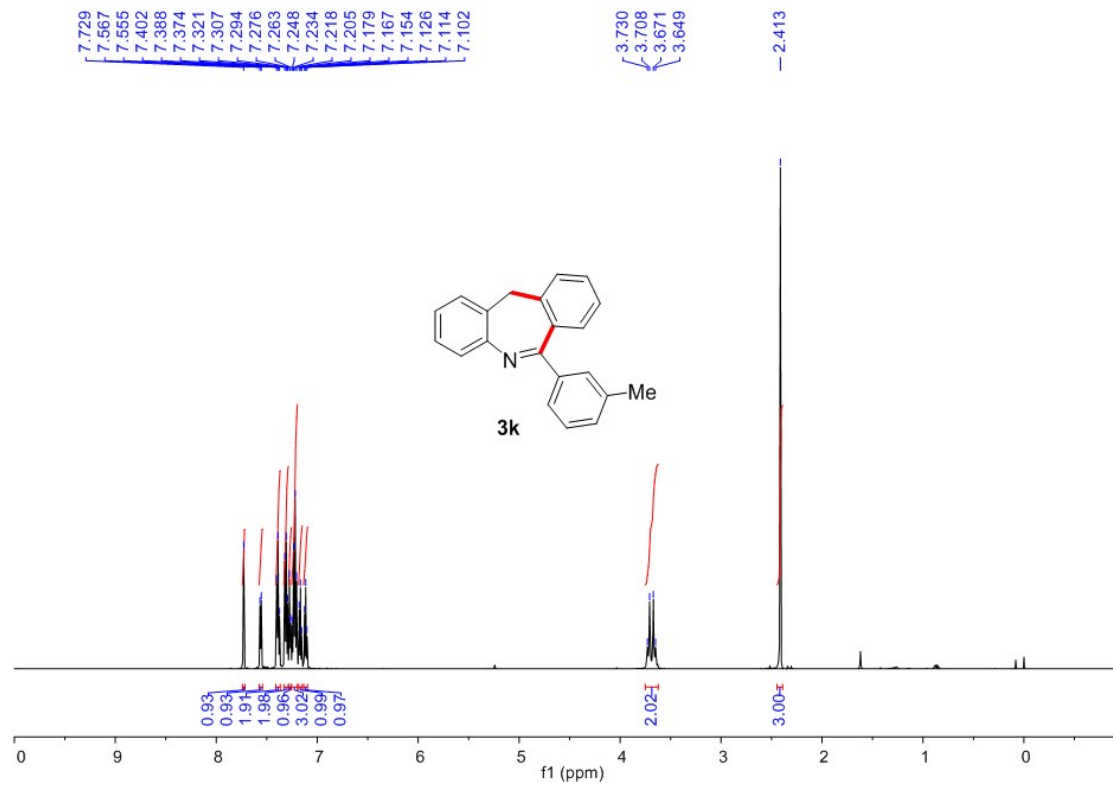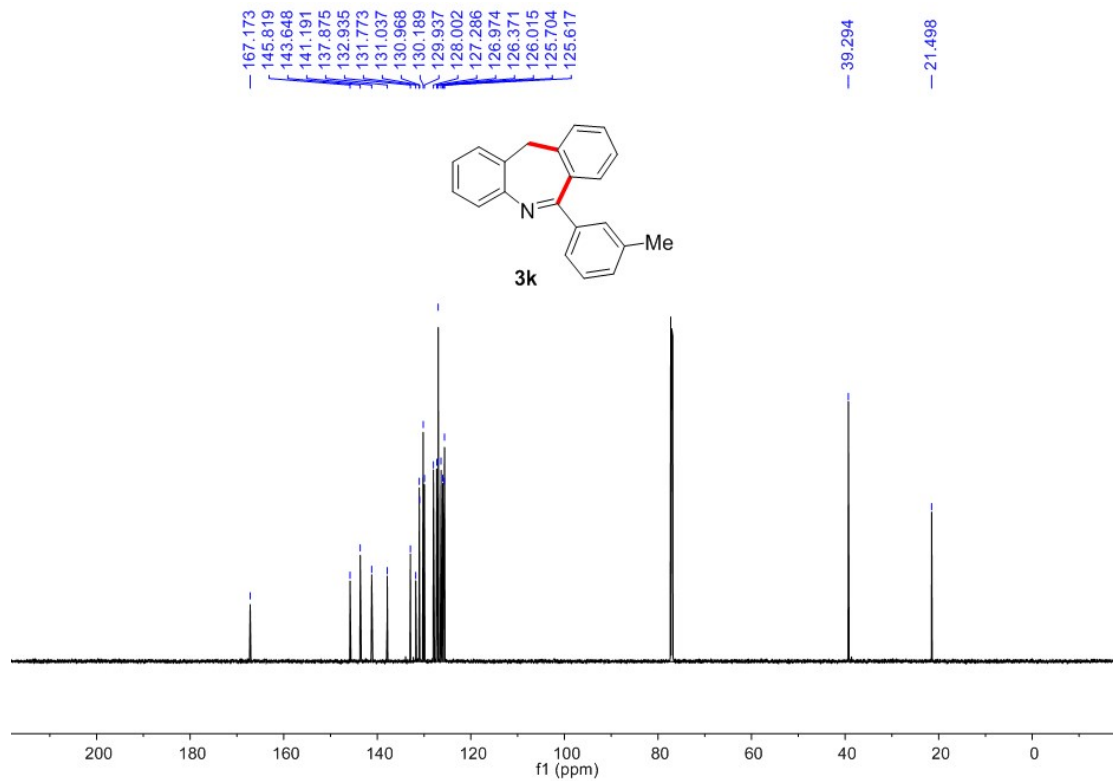

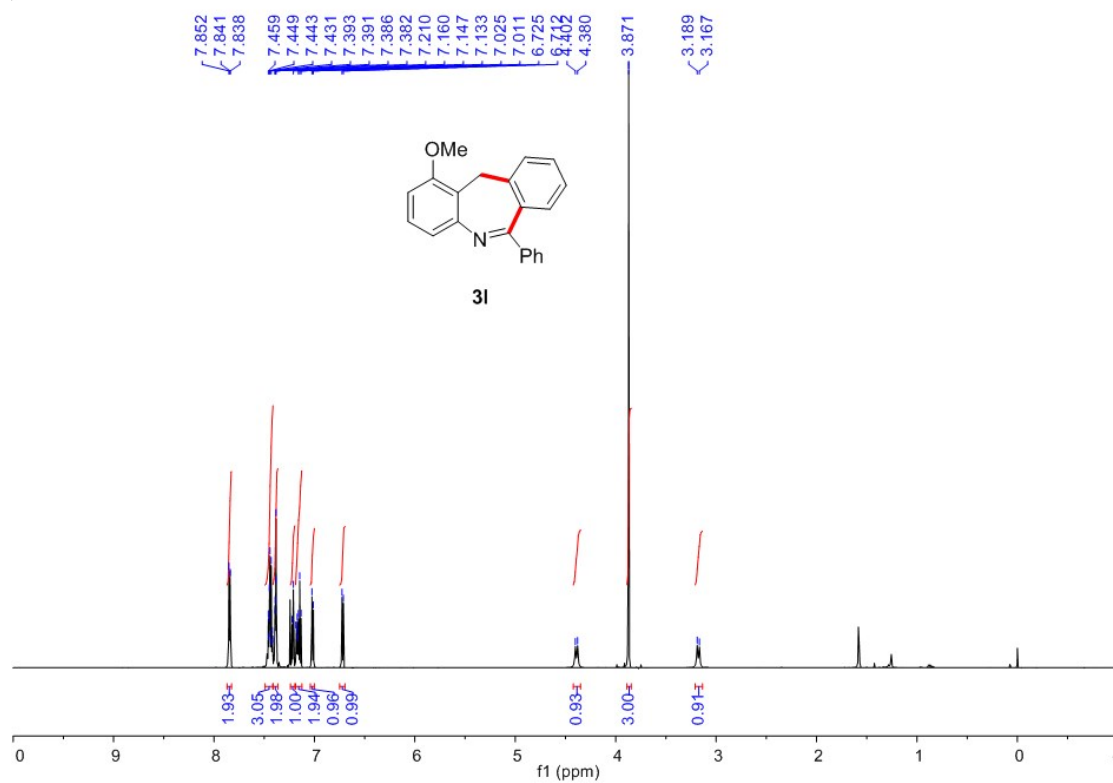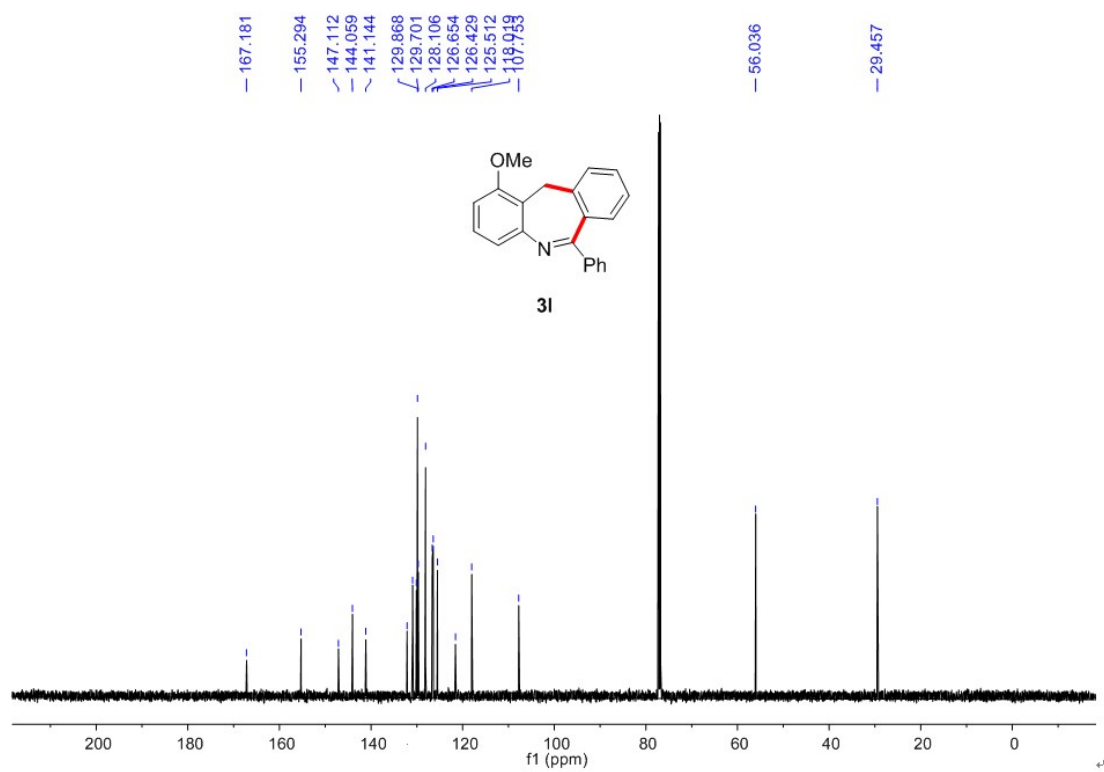

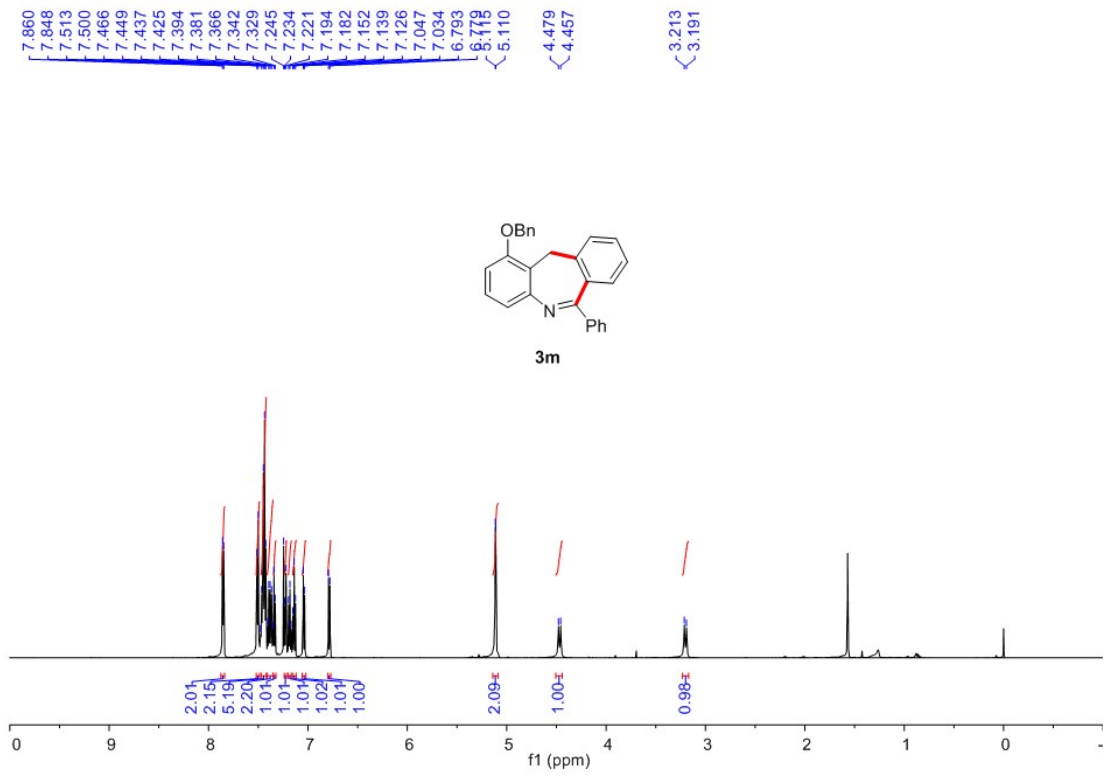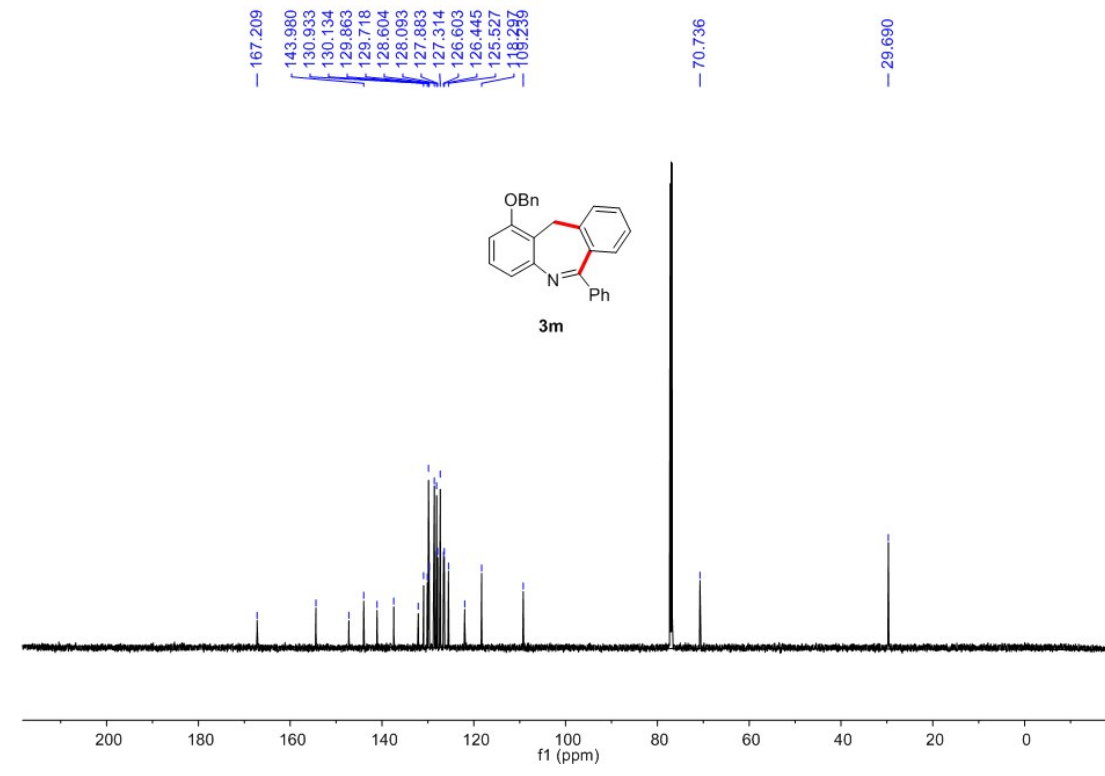

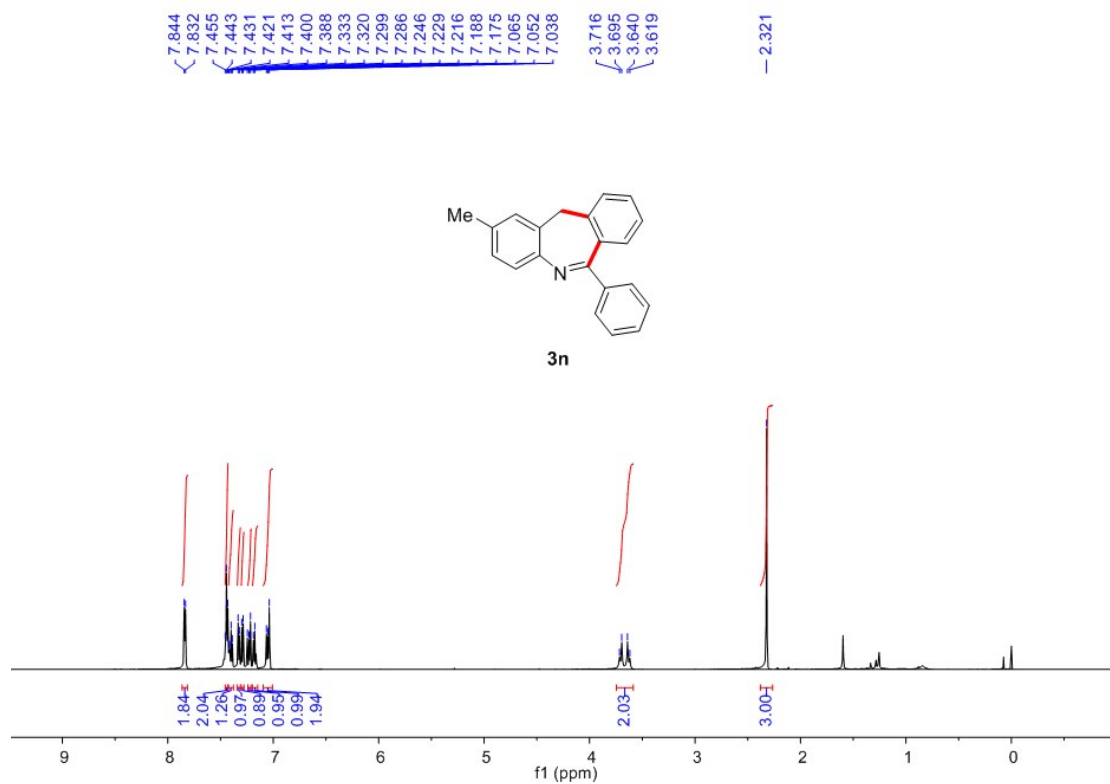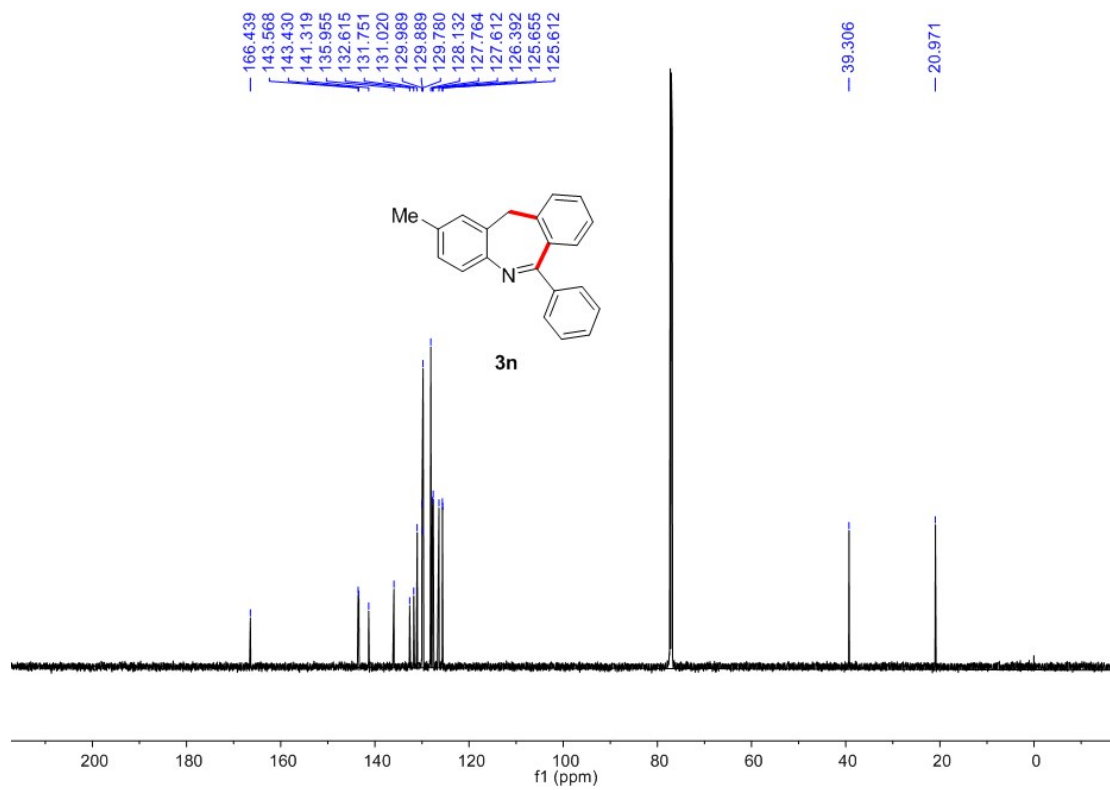

7.857  
7.845  
7.509  
7.491  
7.477  
7.462  
7.454  
7.448  
7.366  
7.353  
7.260  
7.248  
7.241  
7.229

3.777  
3.755  
3.731  
3.708

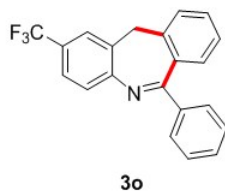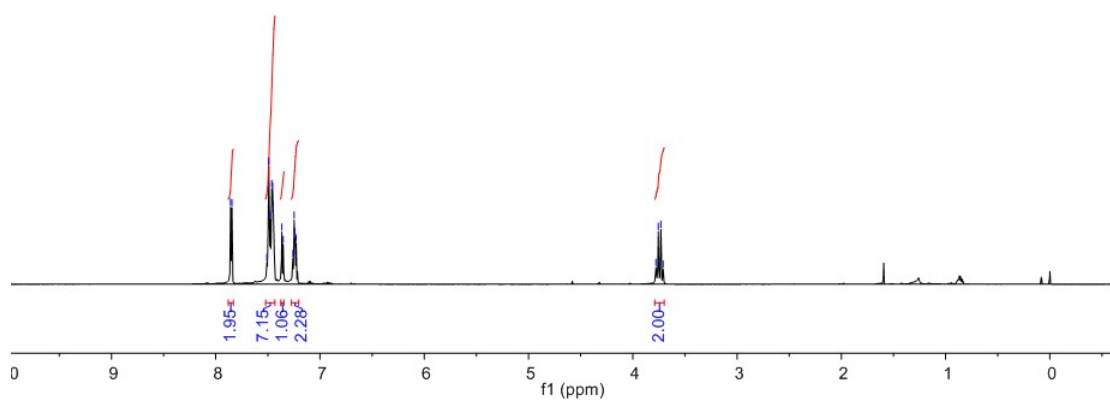

168.611  
148.451  
143.060  
140.497  
133.167  
131.510  
131.368  
130.692  
129.964  
129.922  
128.227  
127.873  
127.659  
127.444  
127.232  
127.044  
126.575  
126.137  
125.608  
125.240  
124.034  
124.010  
123.947  
123.923  
123.440  
121.636

38.900

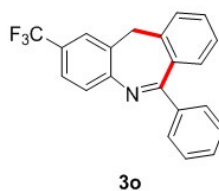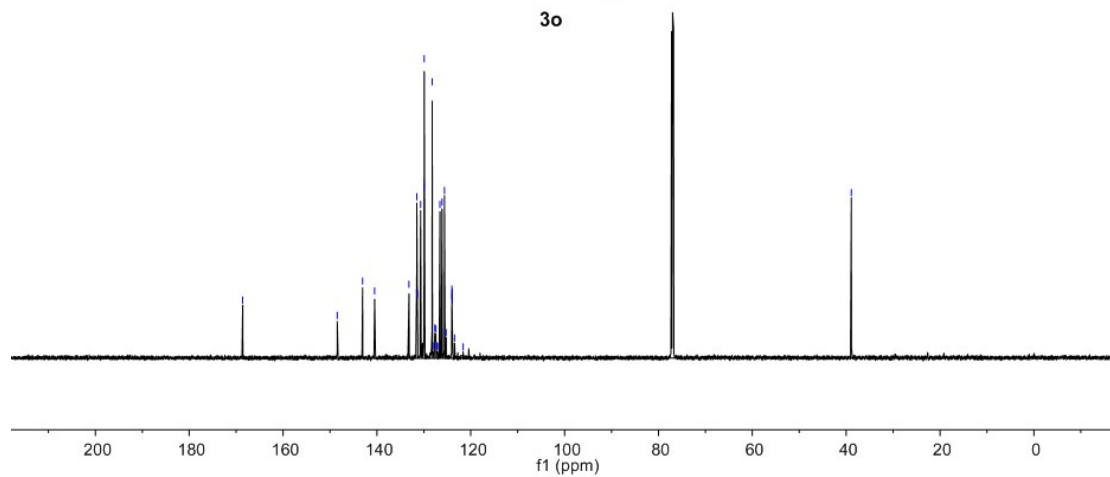



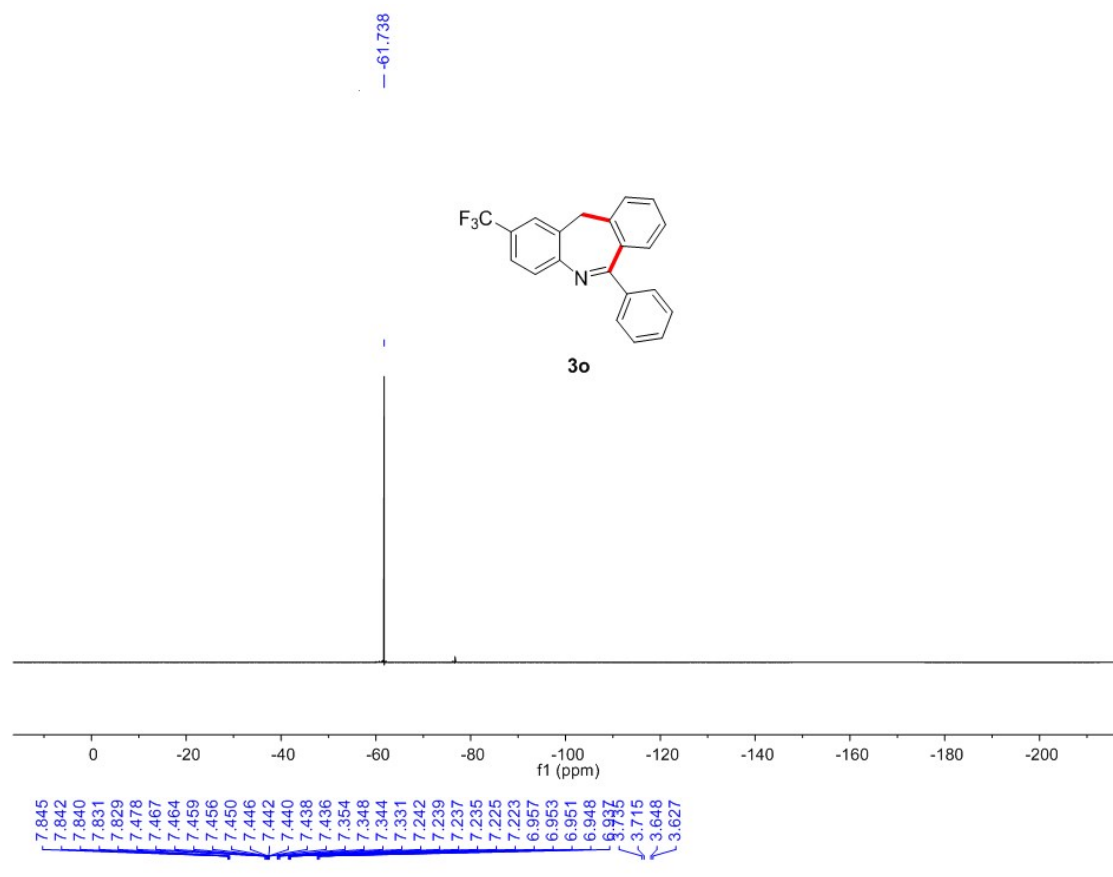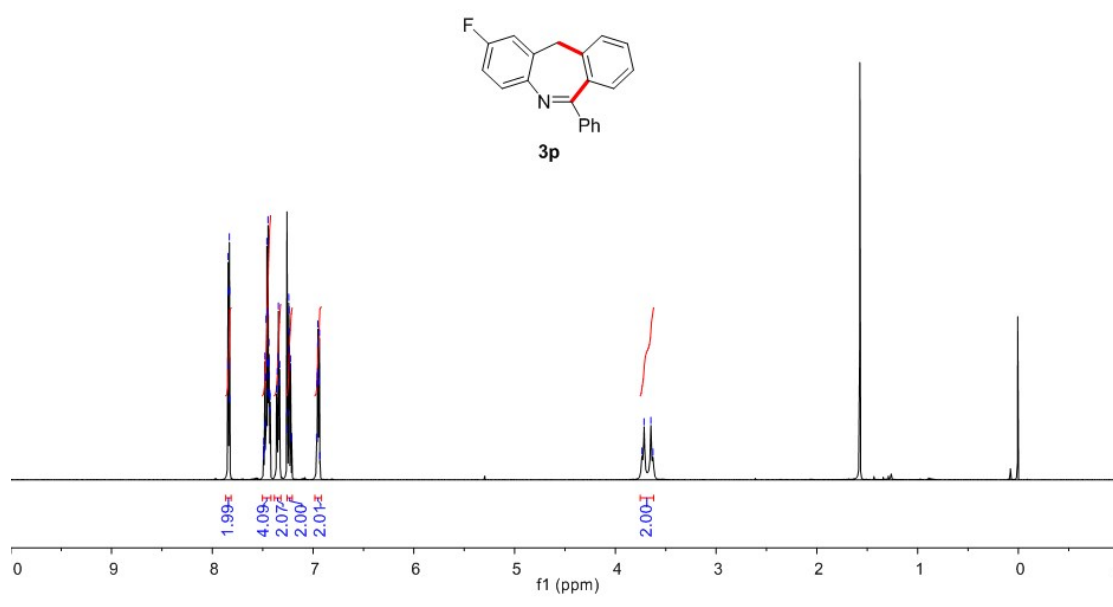

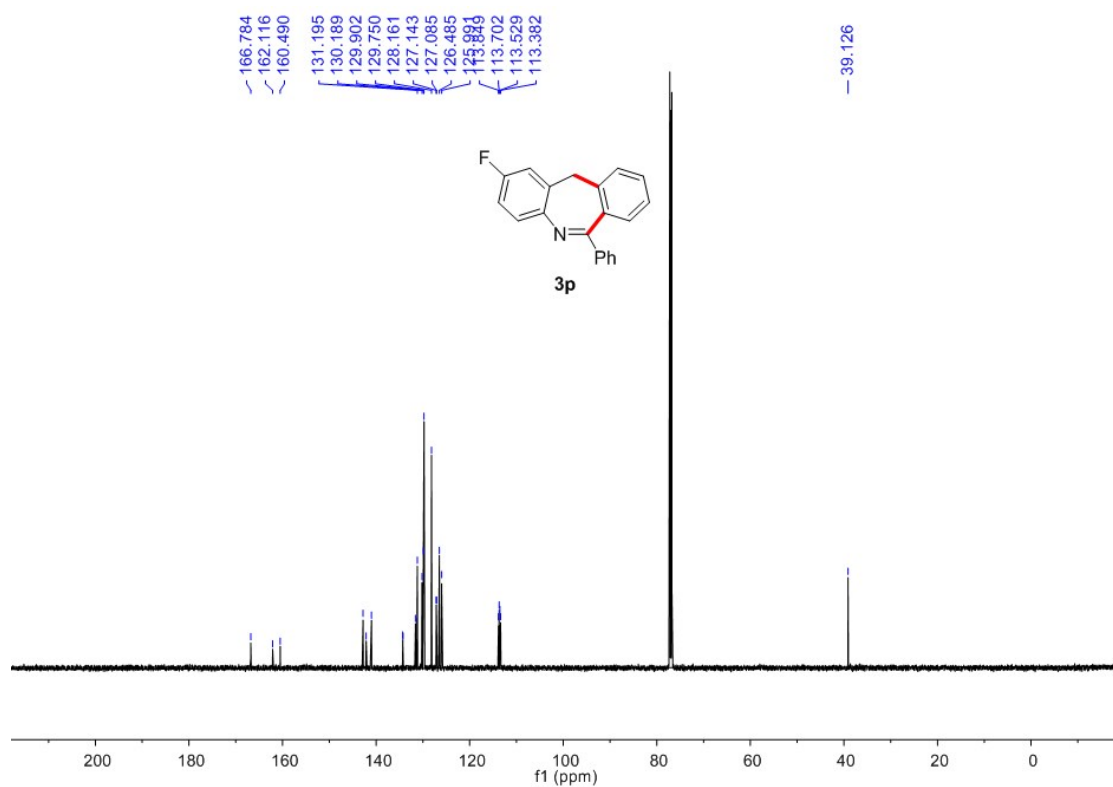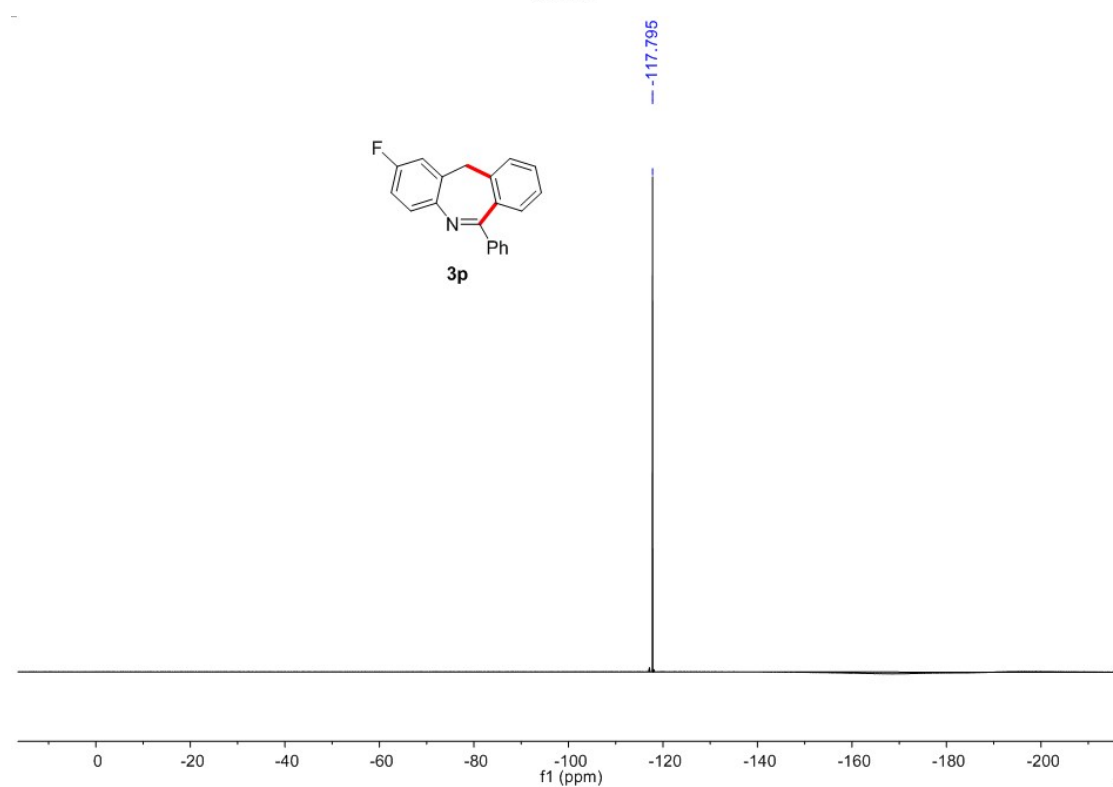

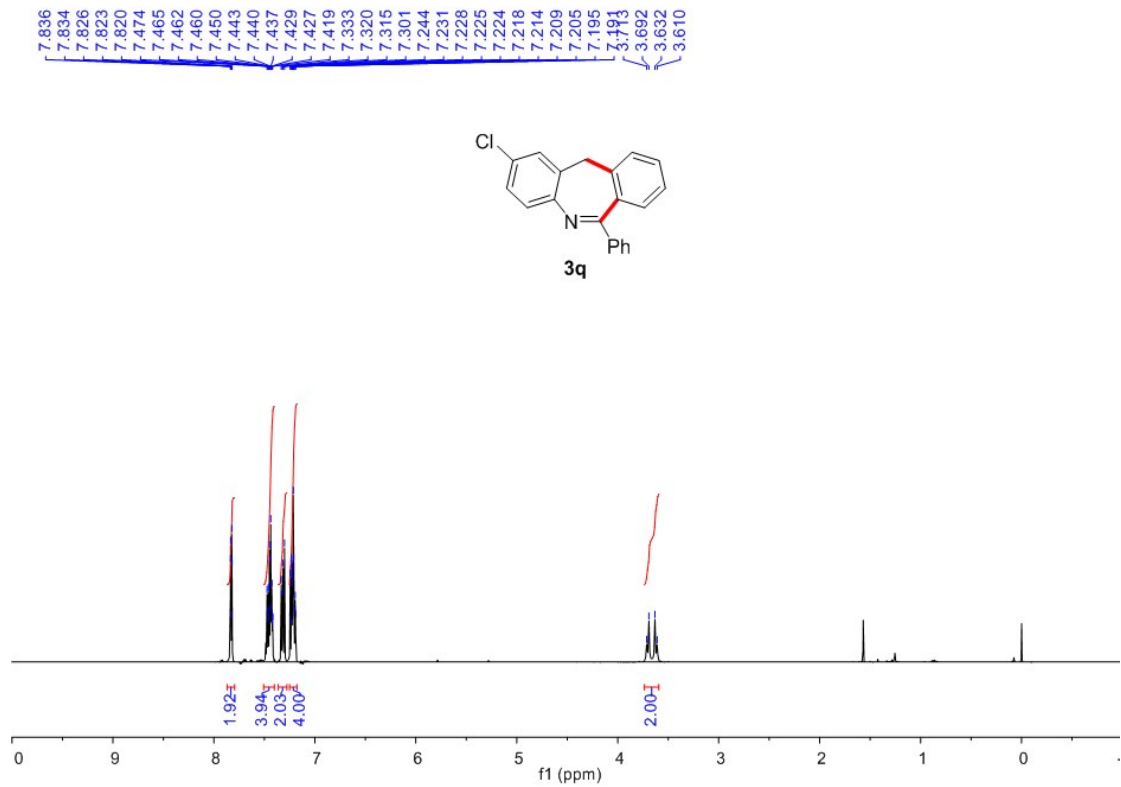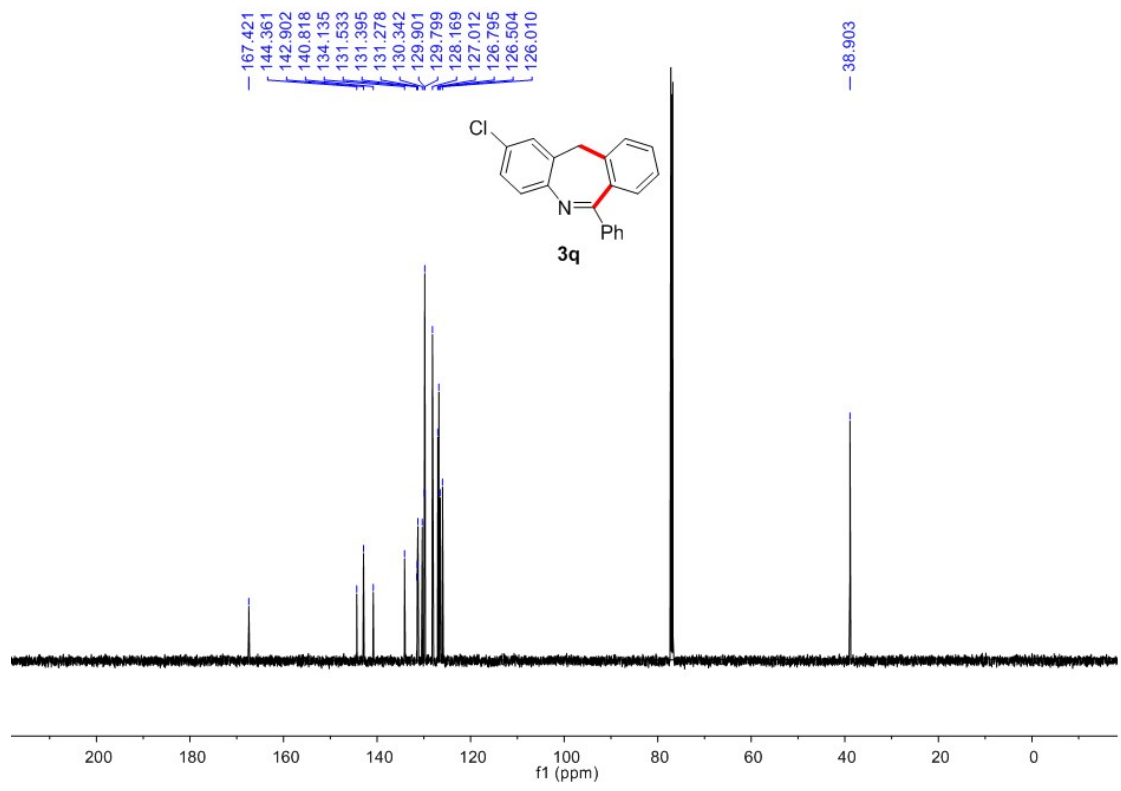

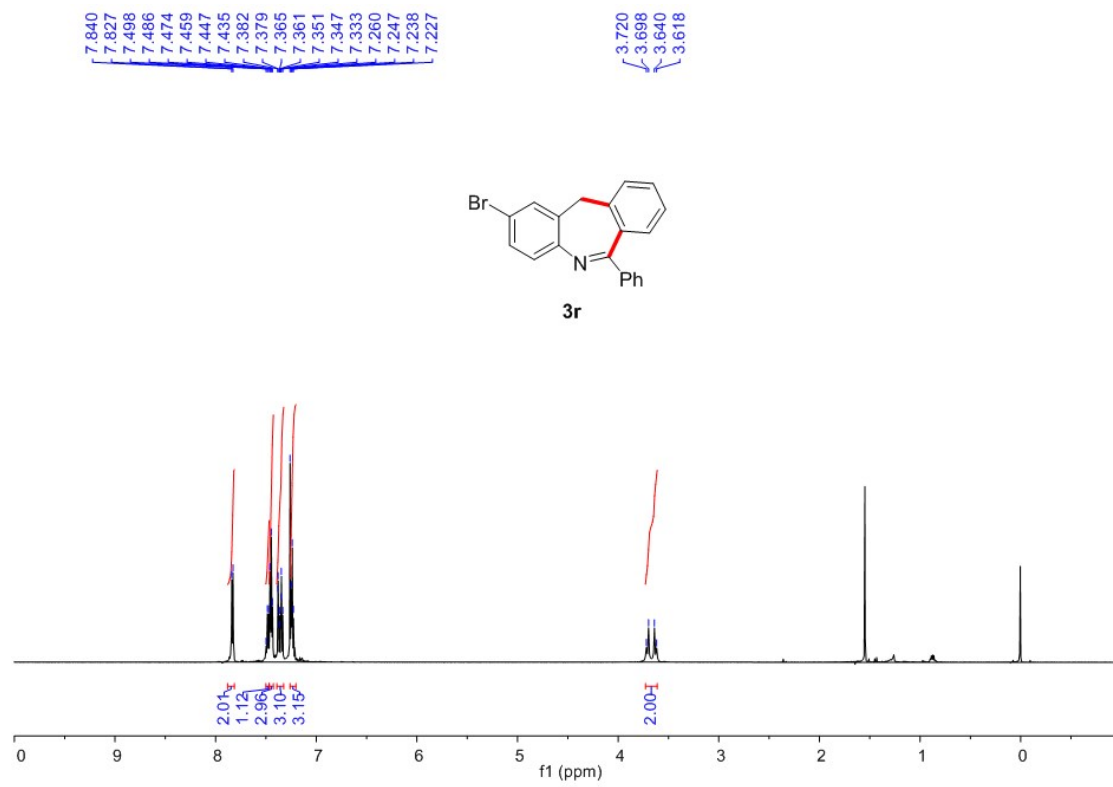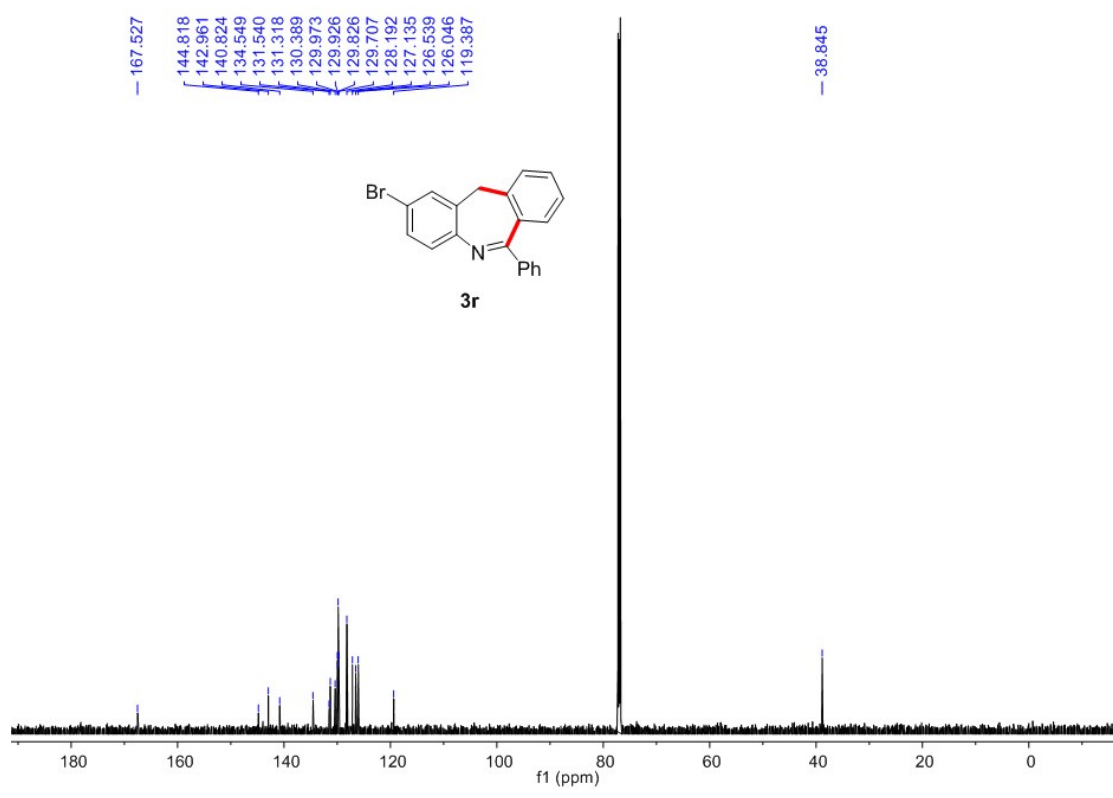

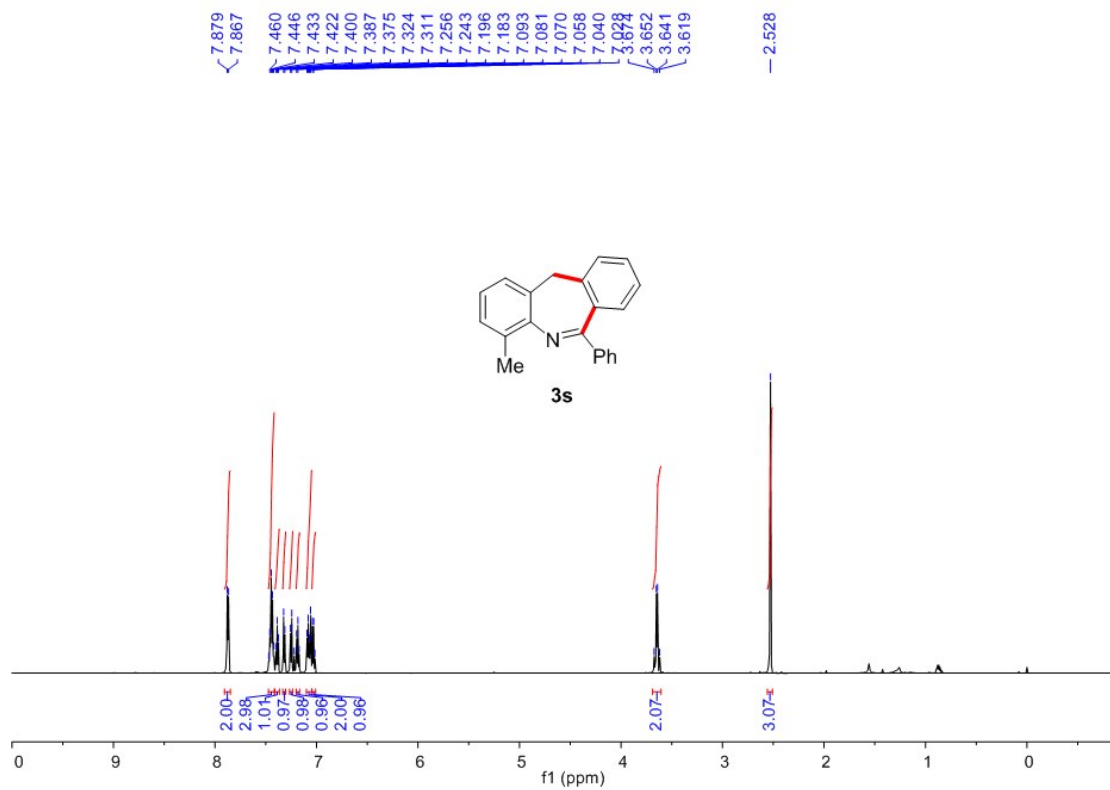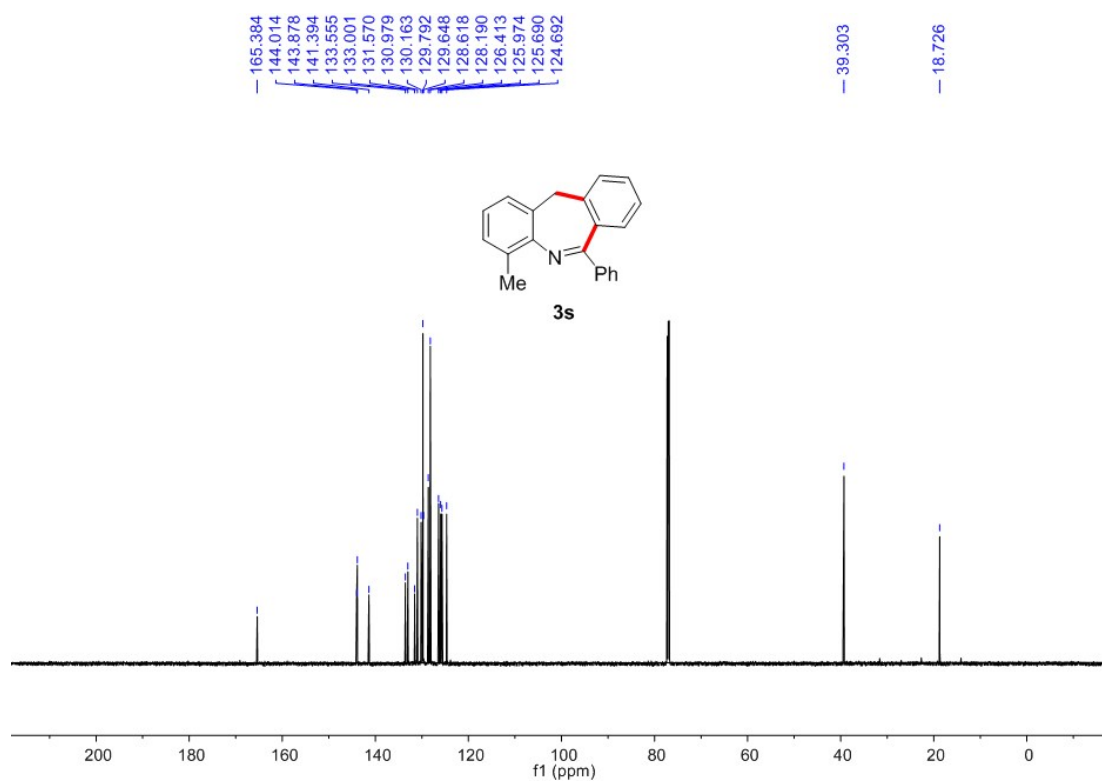

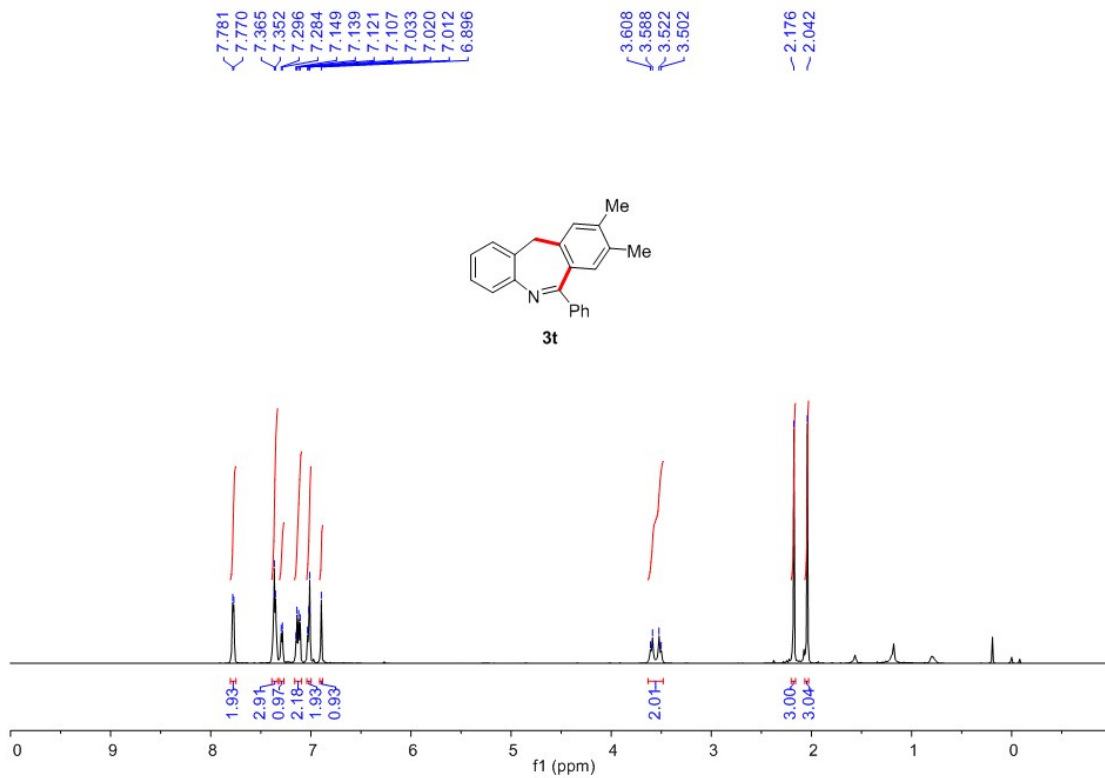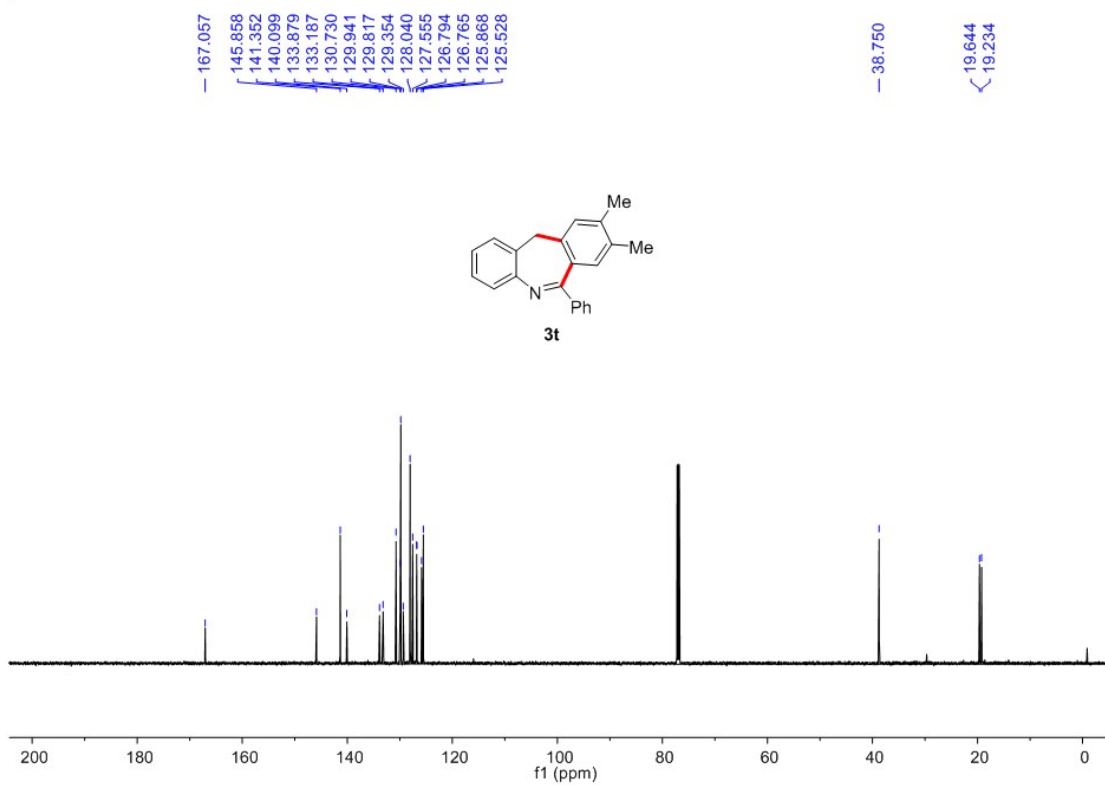

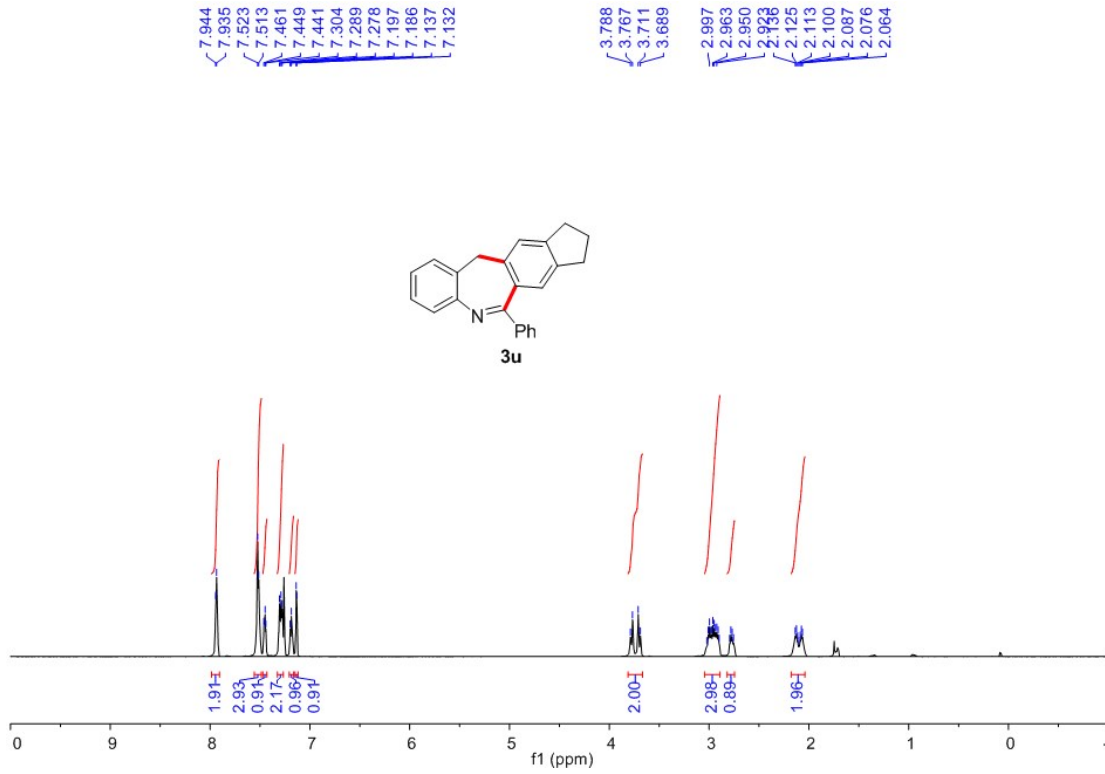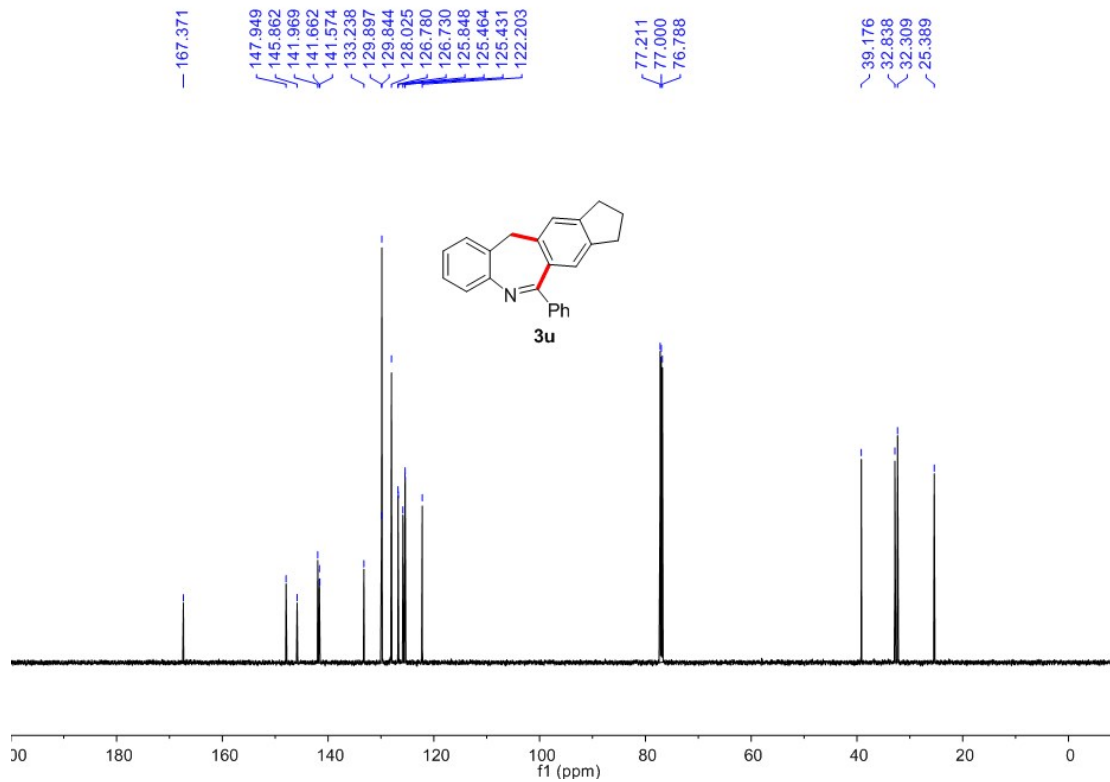

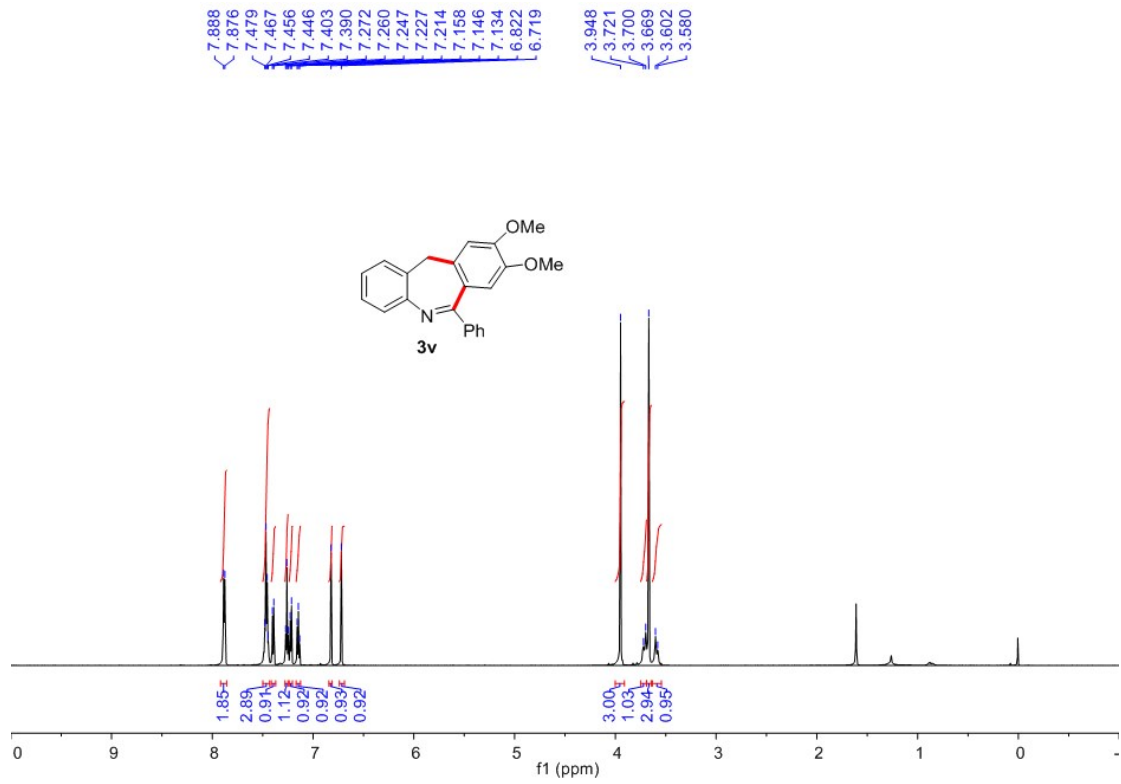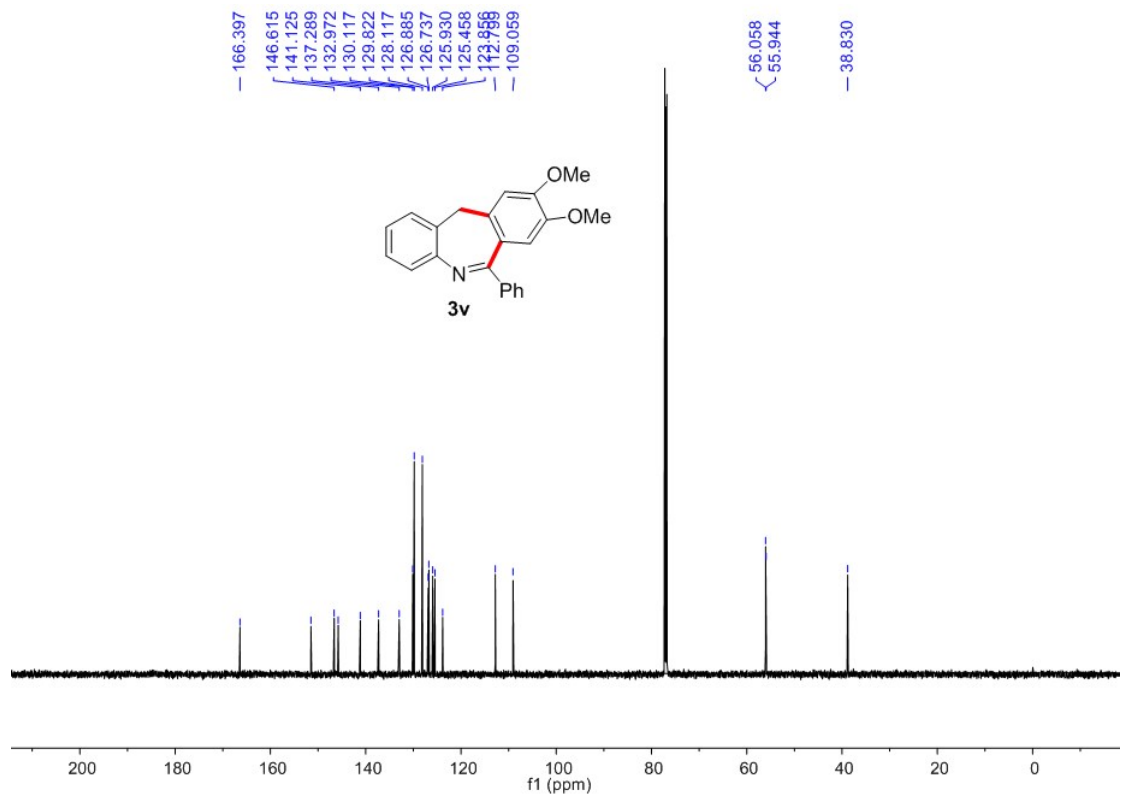



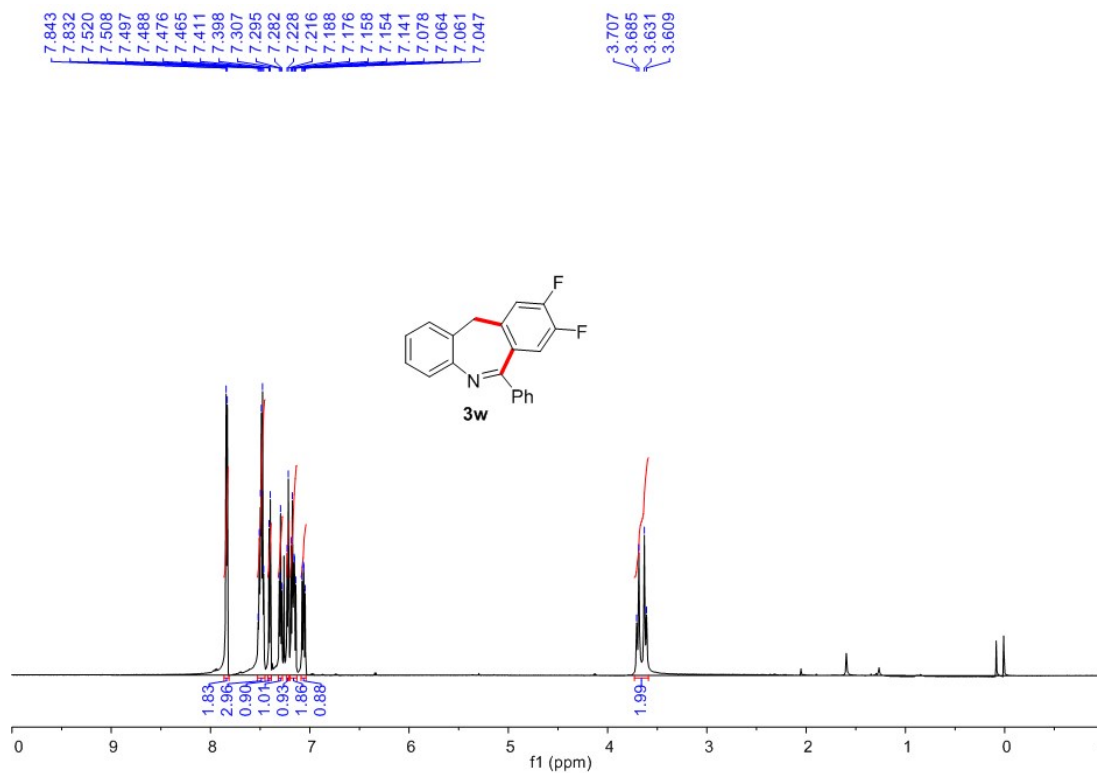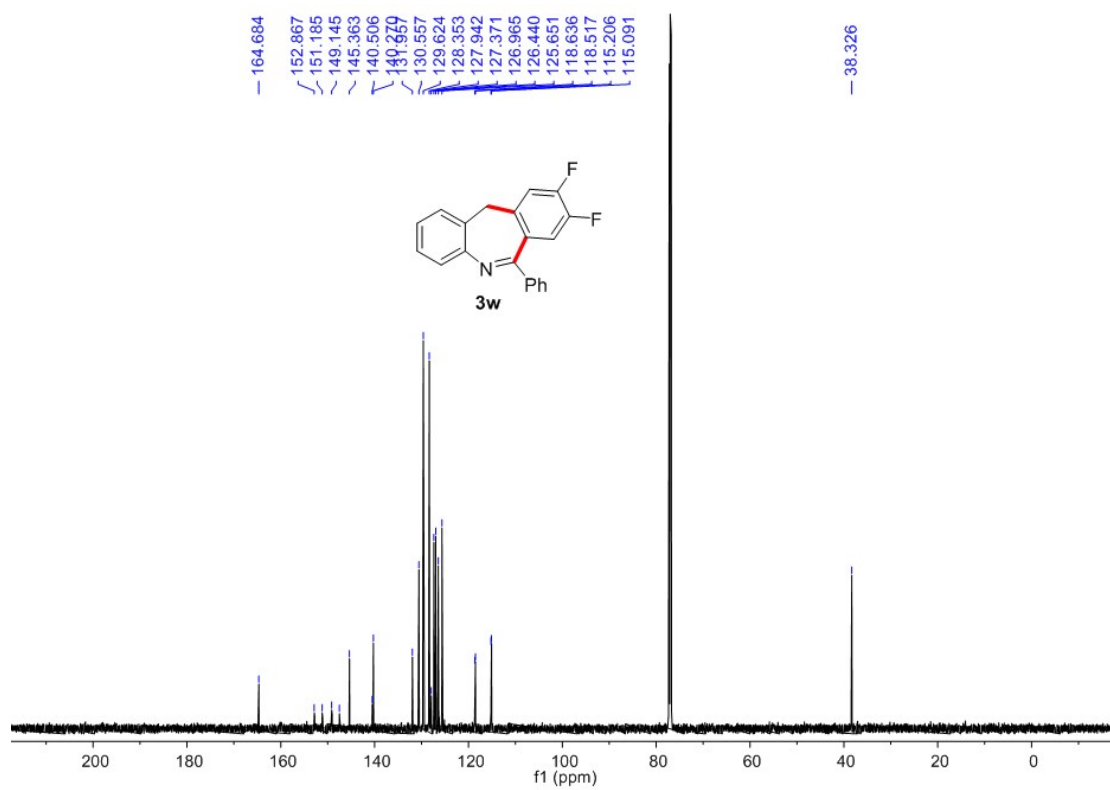

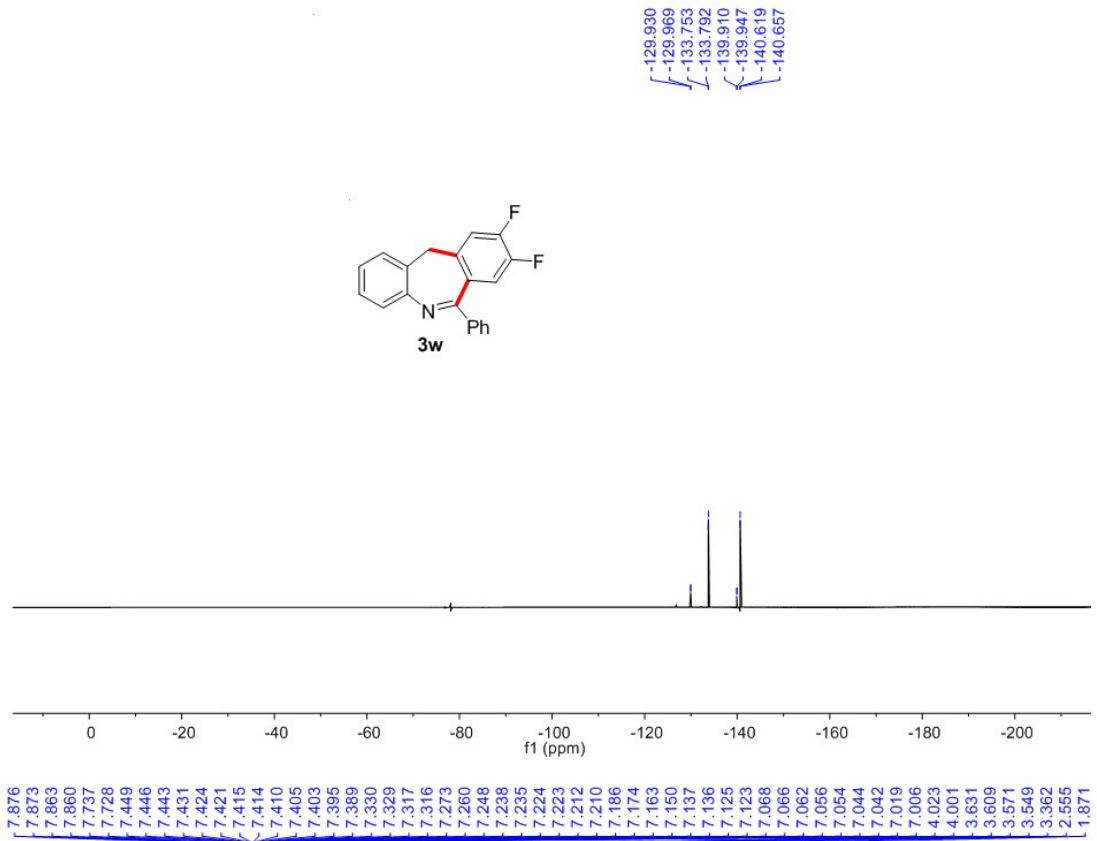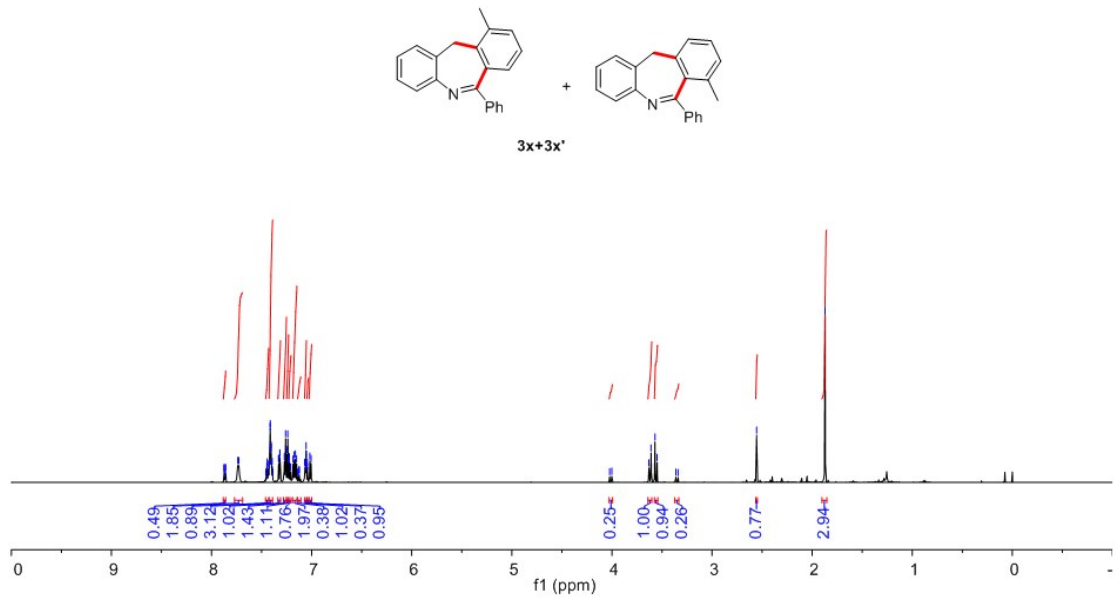

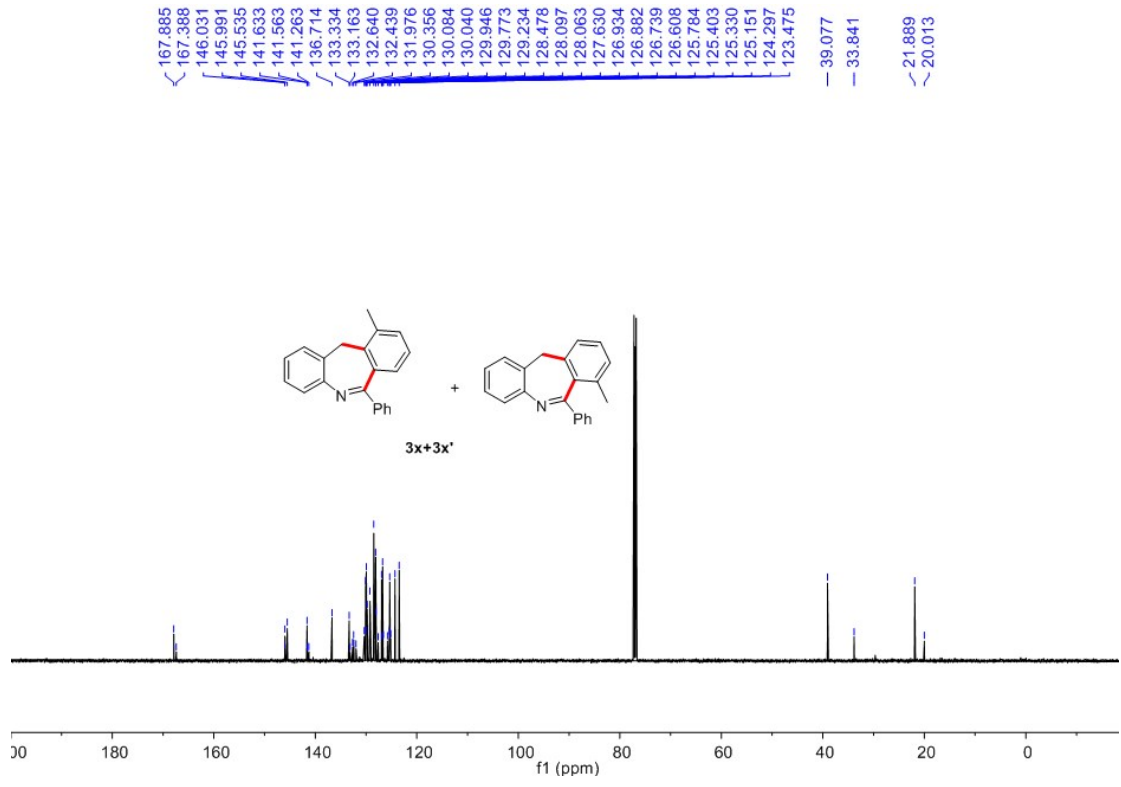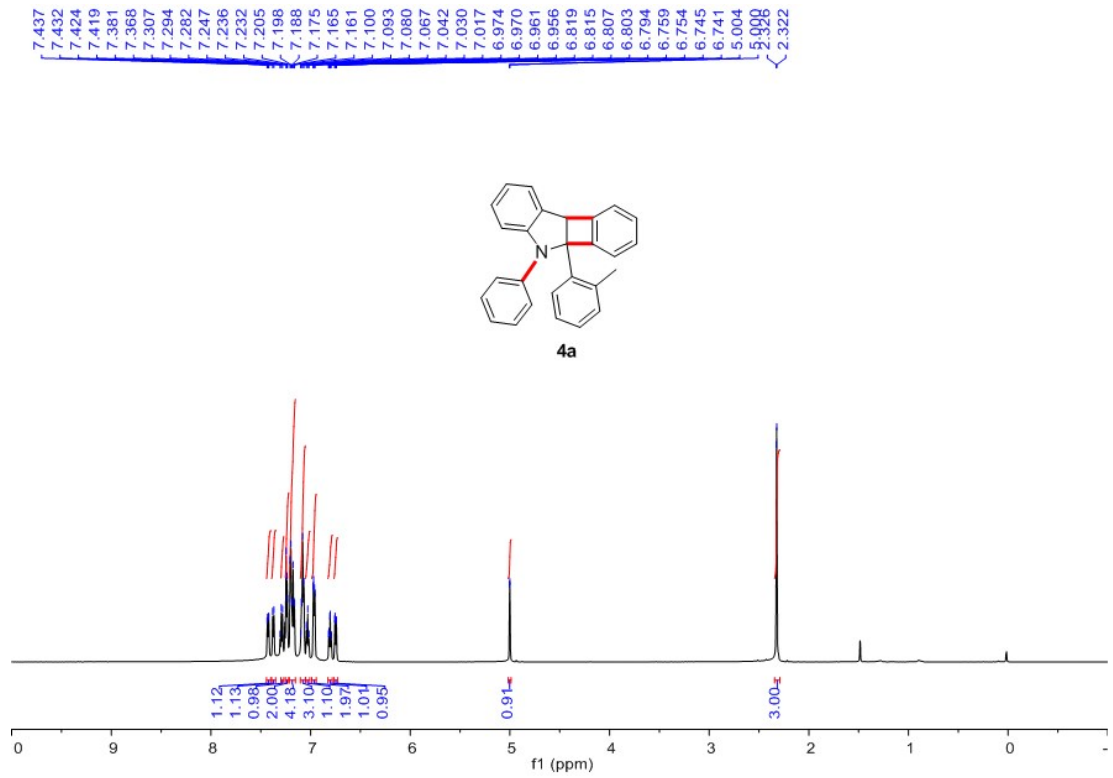

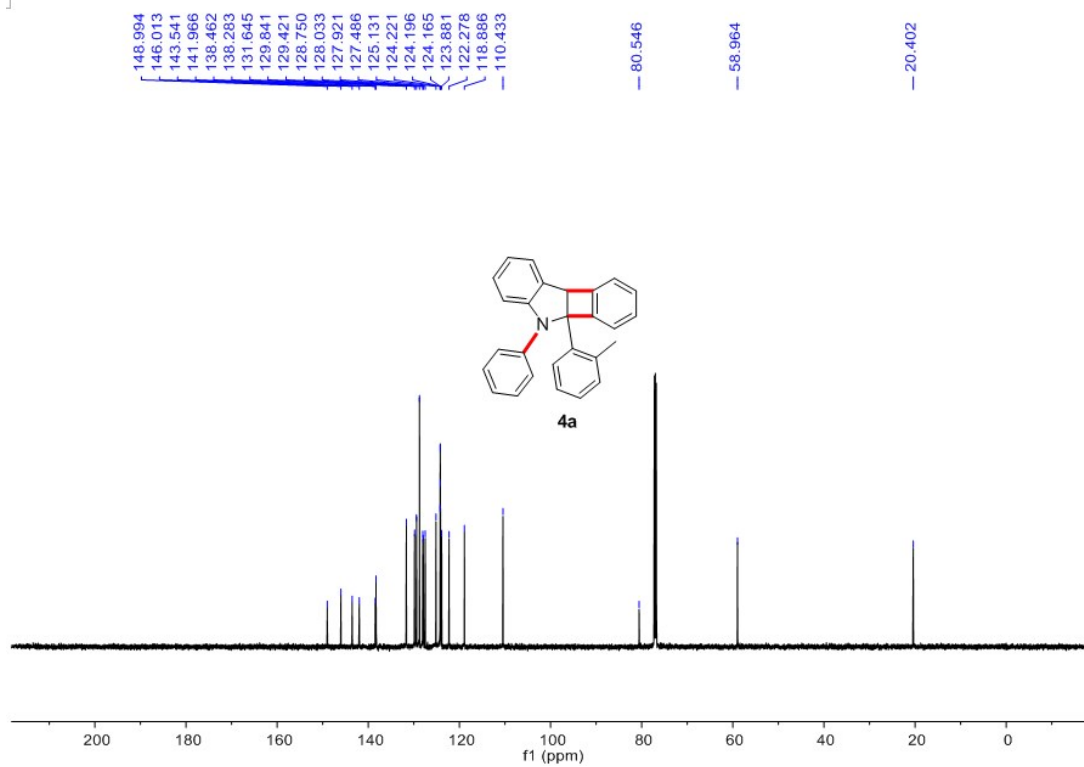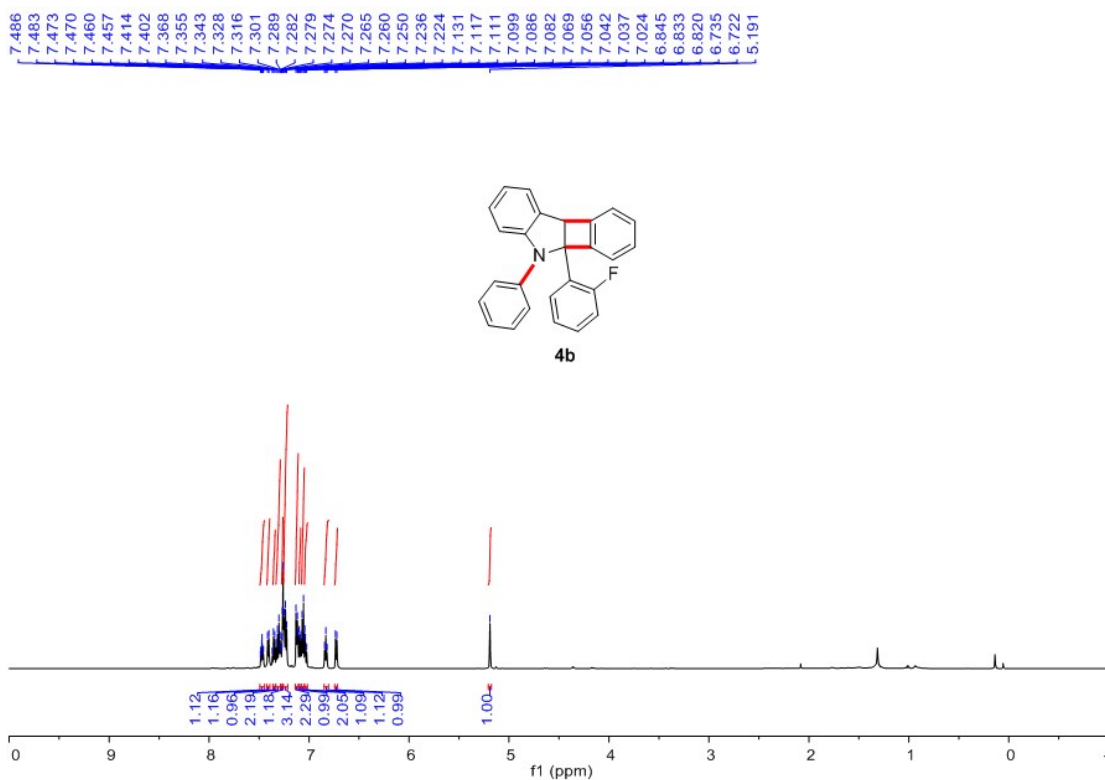

162.504  
160.843  
149.330  
146.233  
143.373  
141.900  
130.626  
130.603  
129.760  
129.706  
129.673  
128.836  
128.754  
127.902  
127.833  
127.702  
124.657  
124.351  
124.316  
123.443  
123.330  
123.308  
122.413  
118.744  
116.028  
115.888  
110.053  
77.454  
60.010

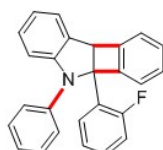

4b

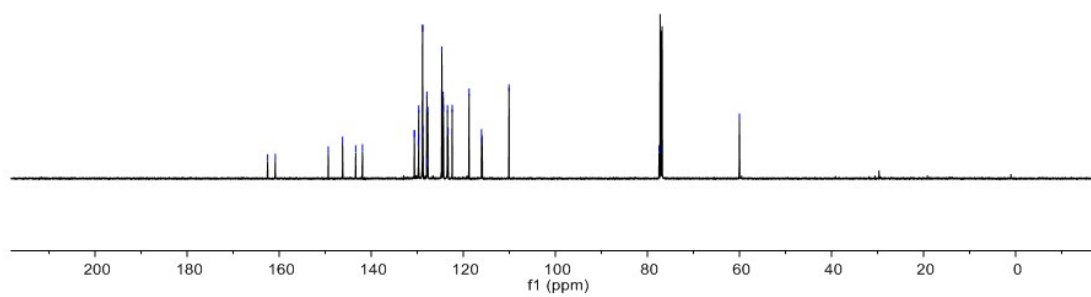

---112.071

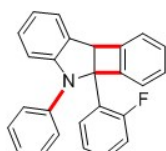

4b

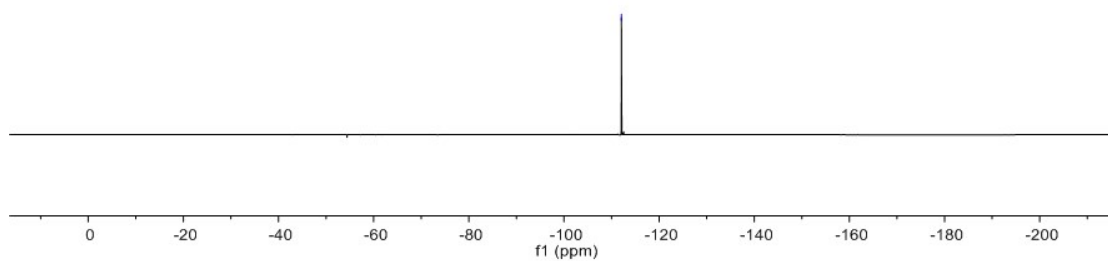

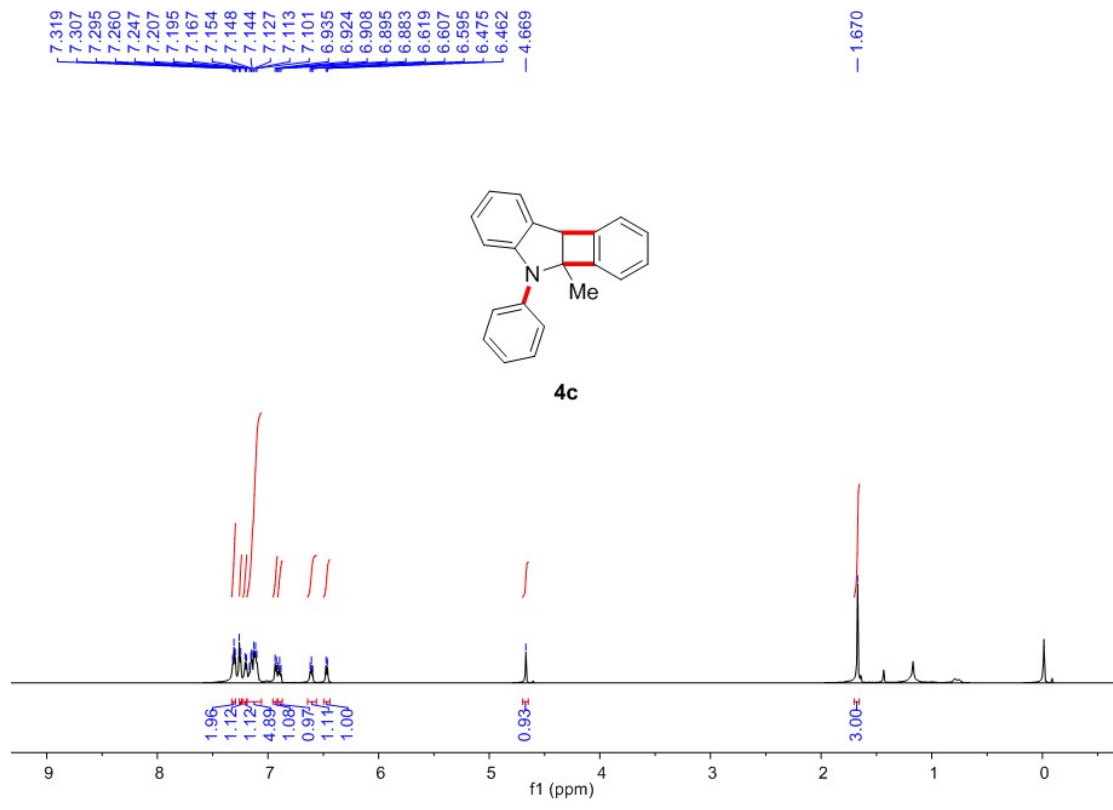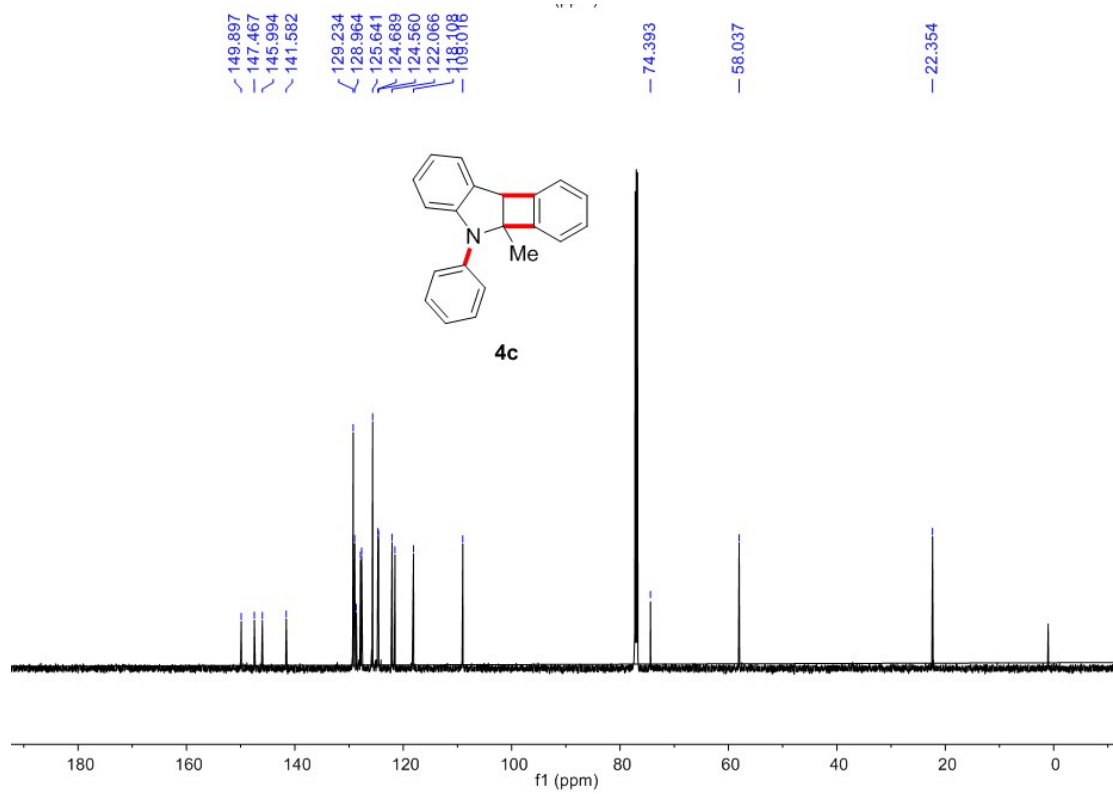

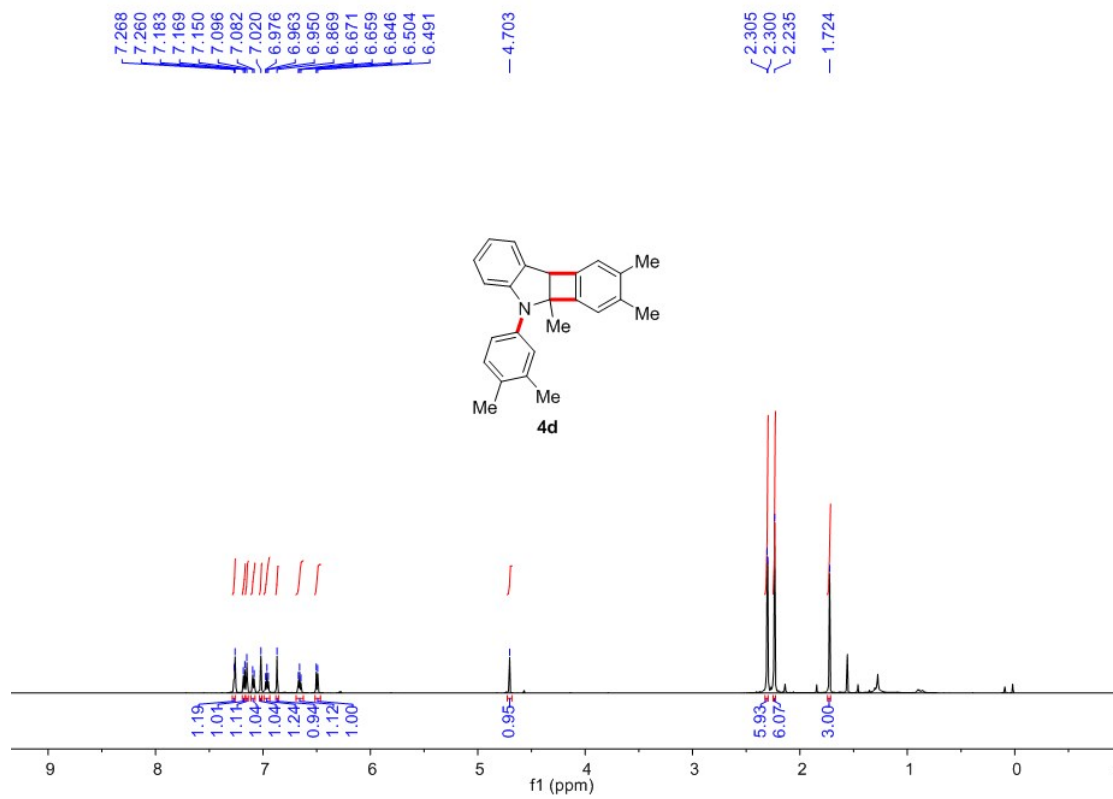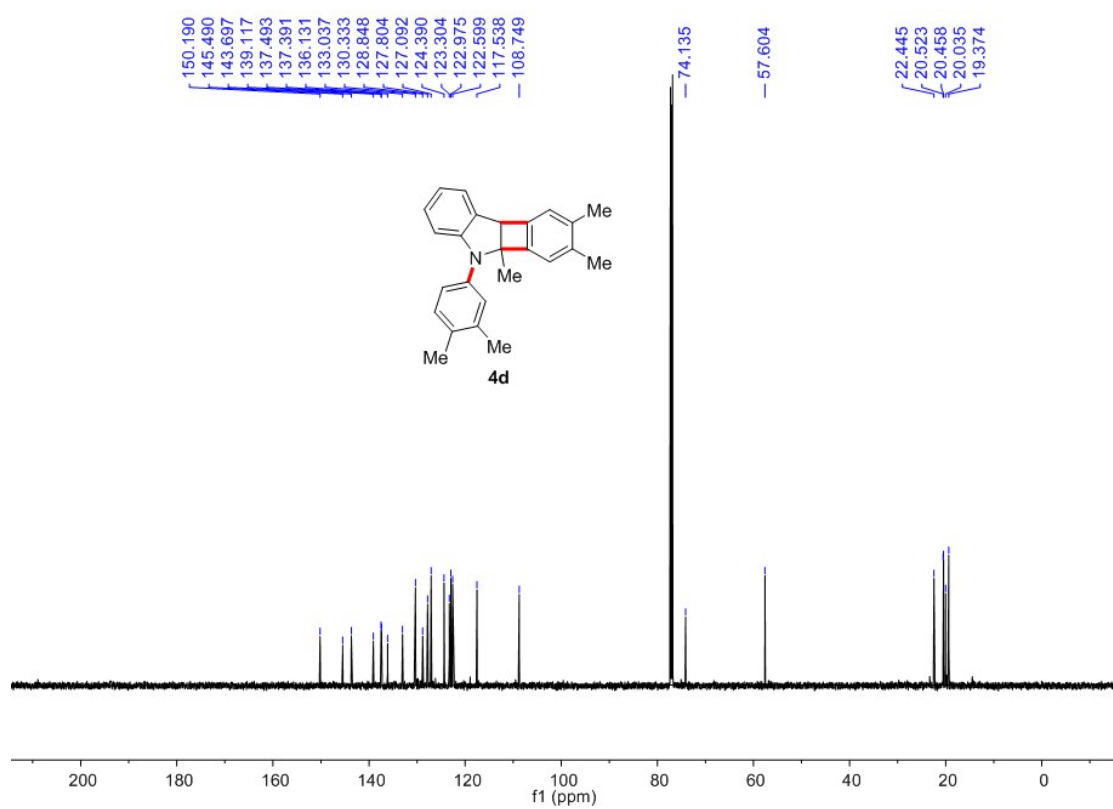

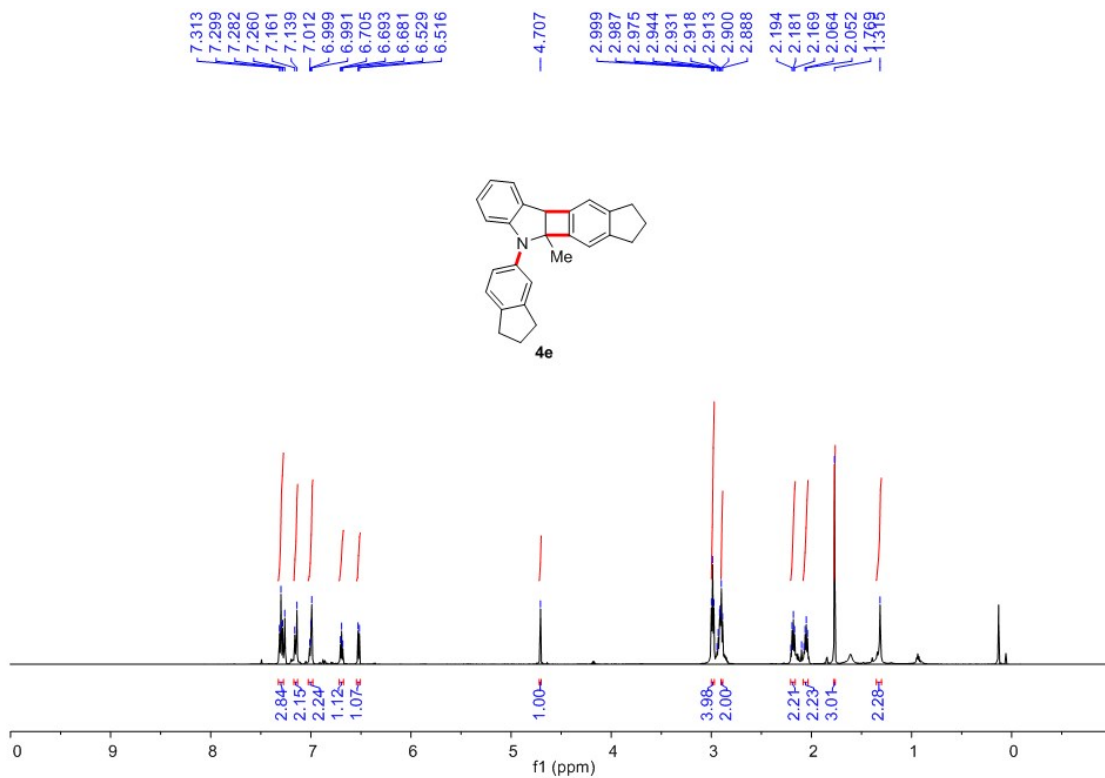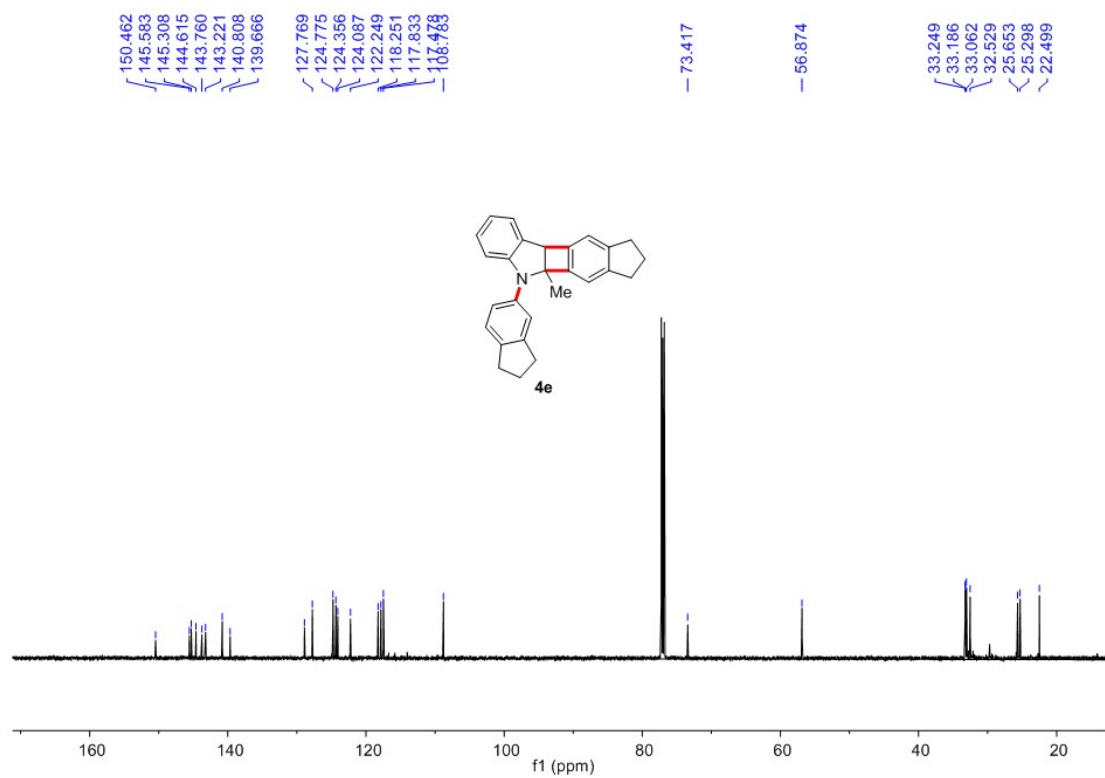



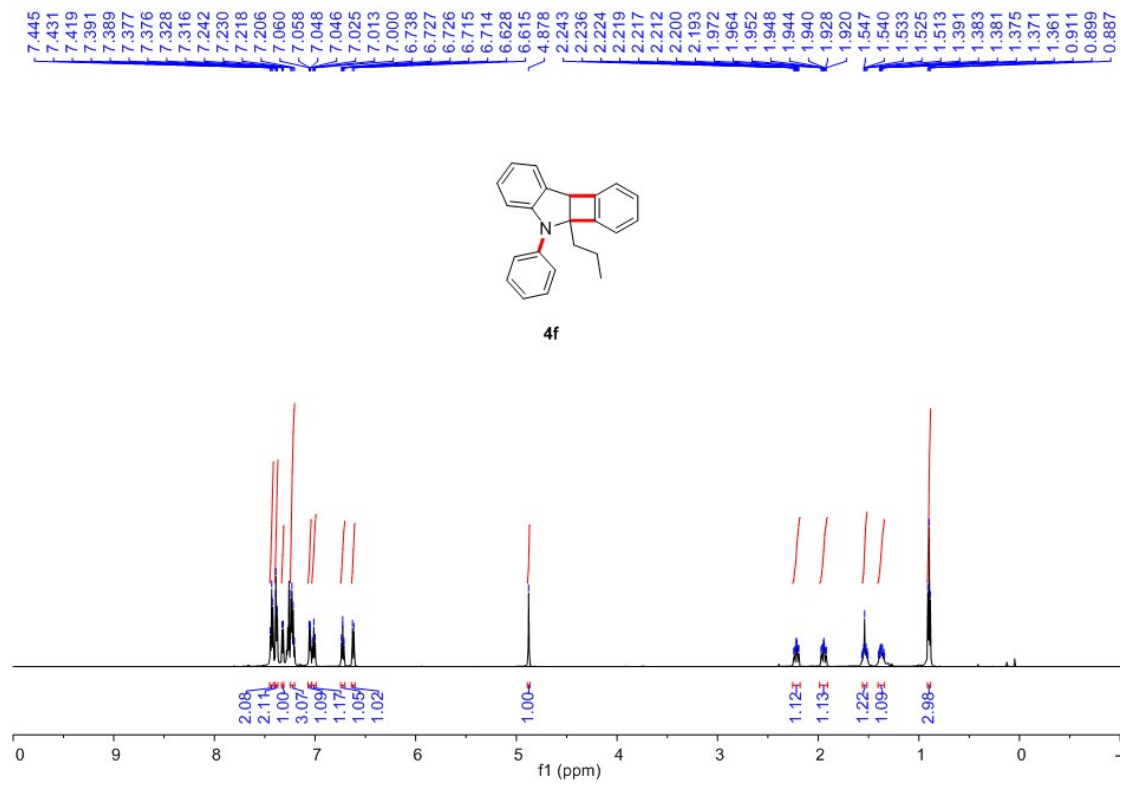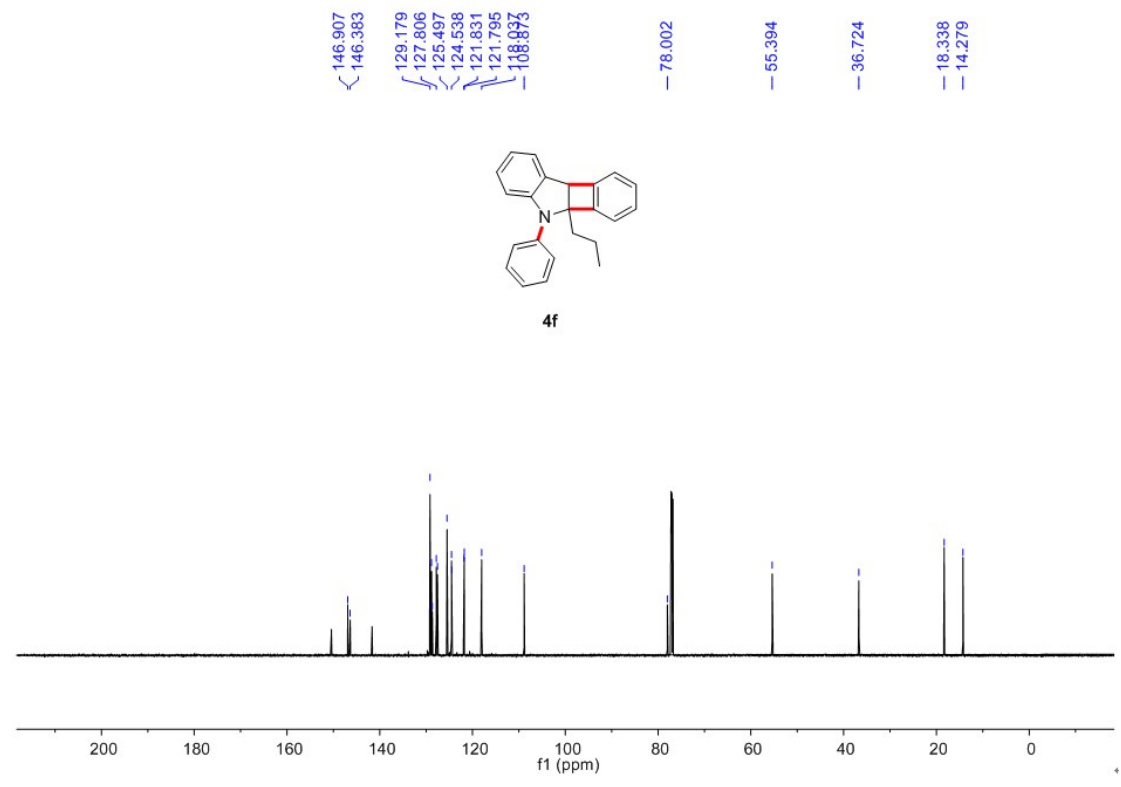

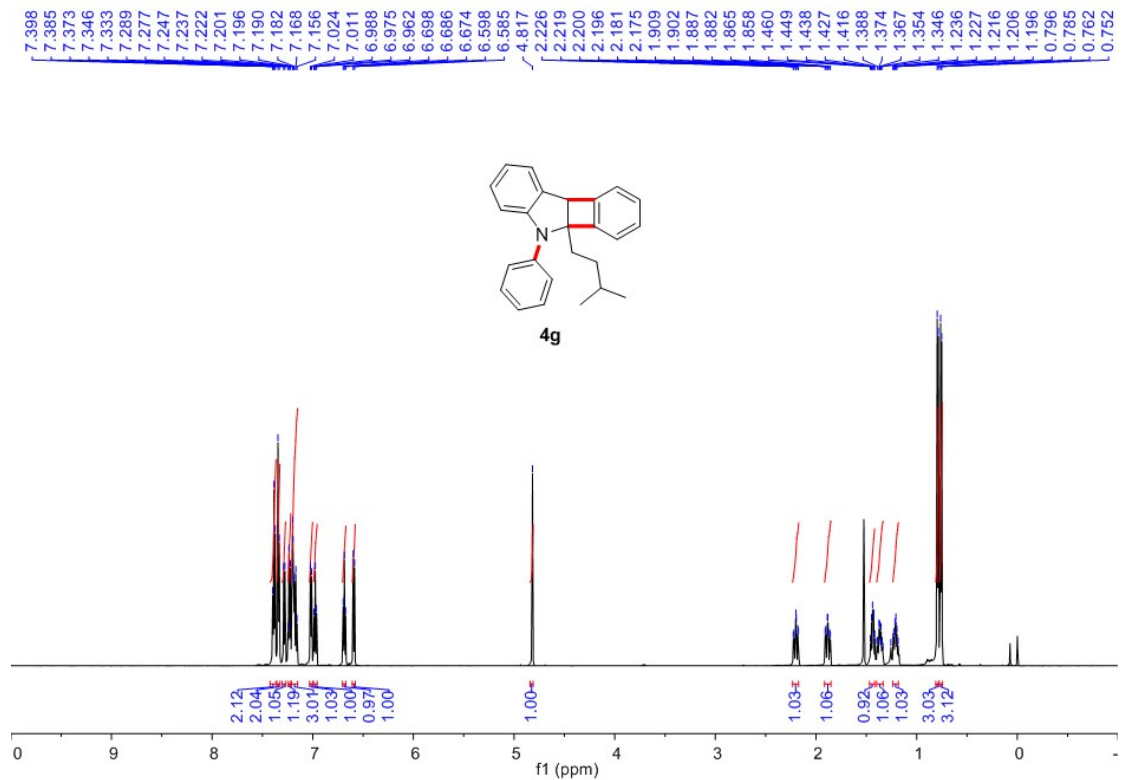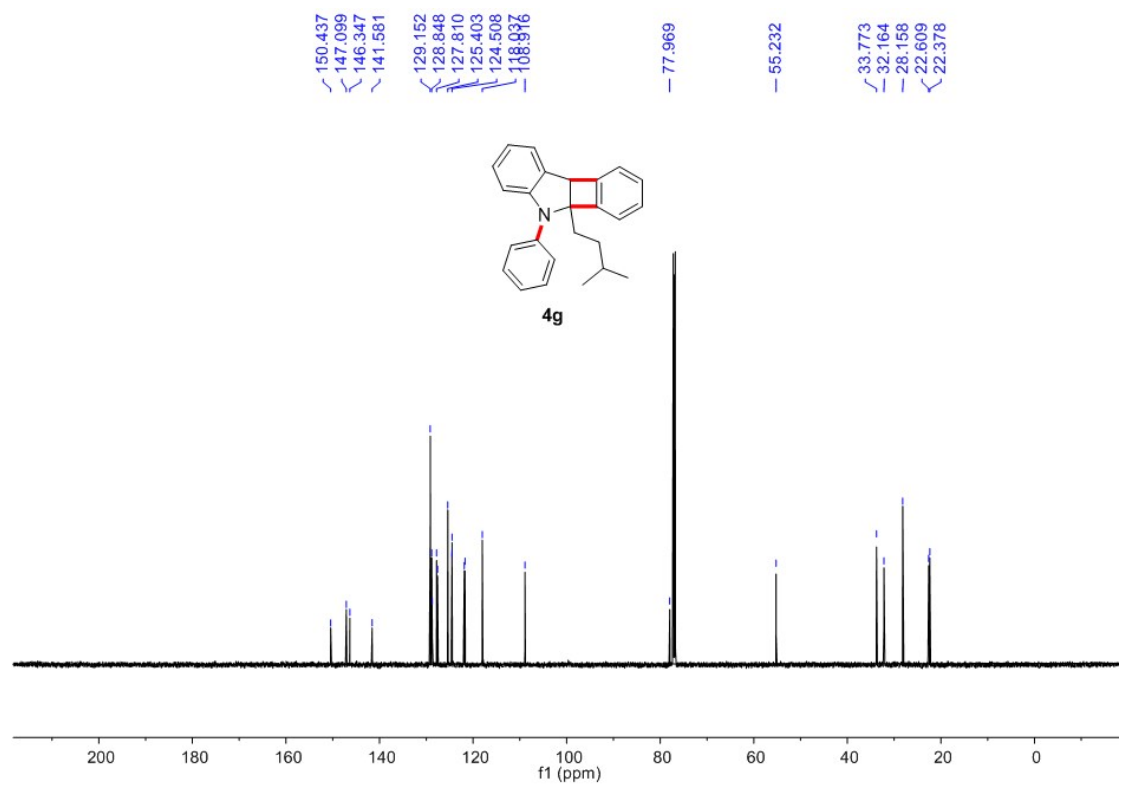

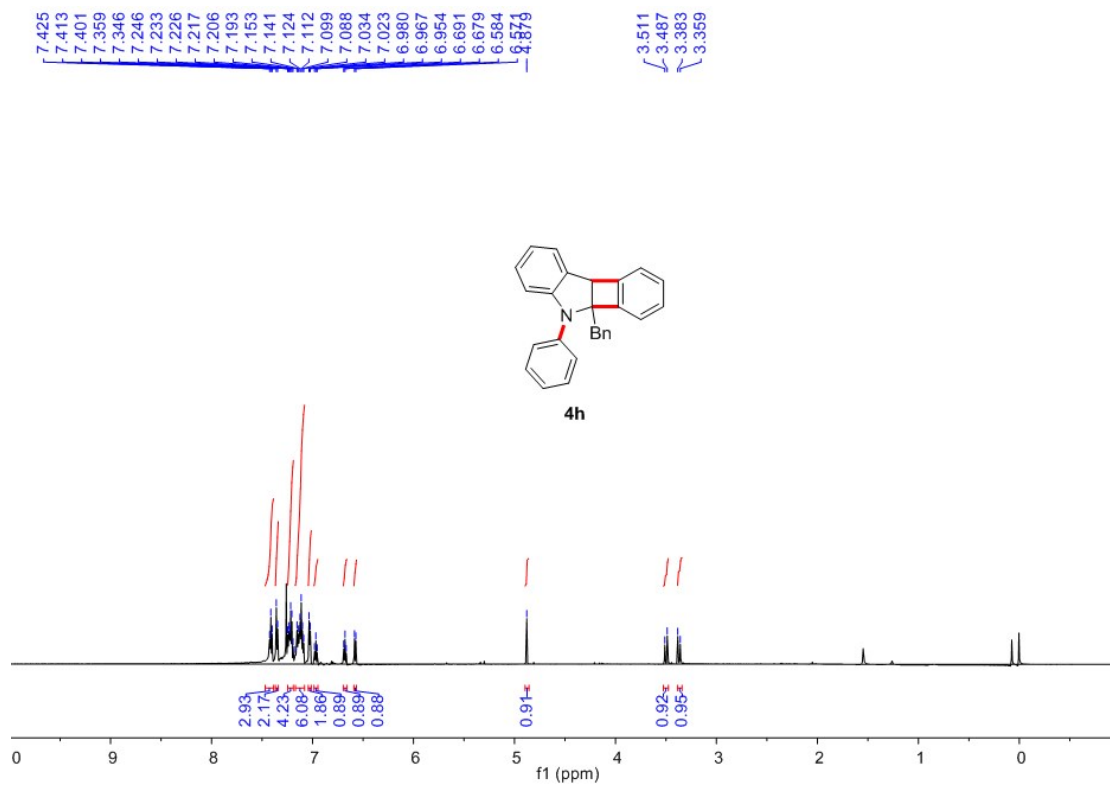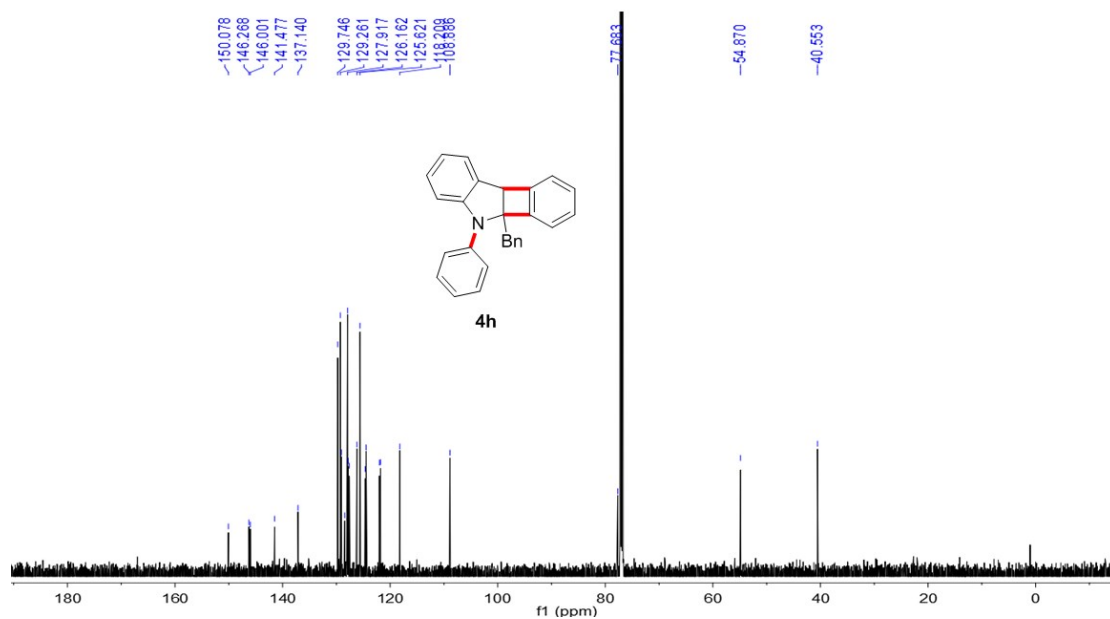

## 8. HRMS Analysis Reports for All Compounds

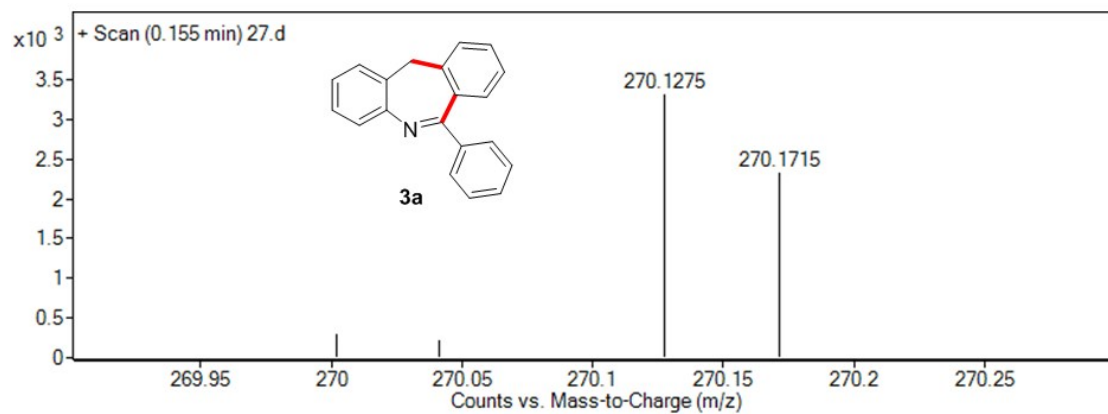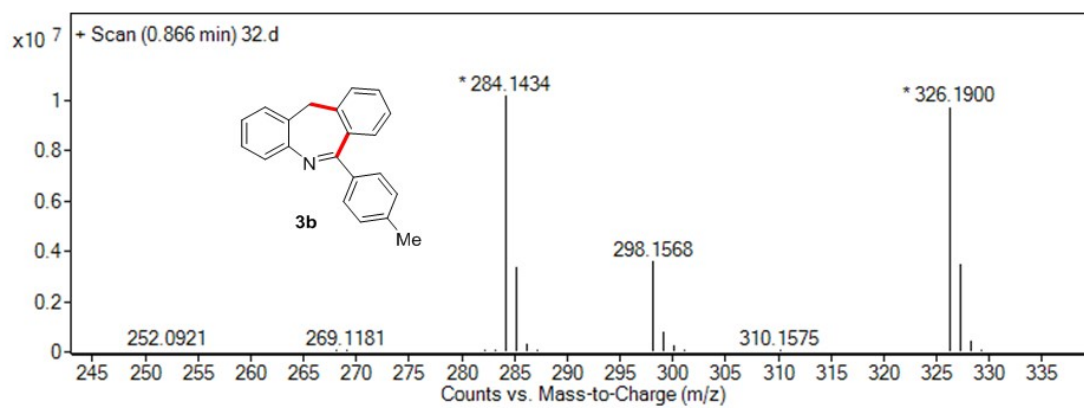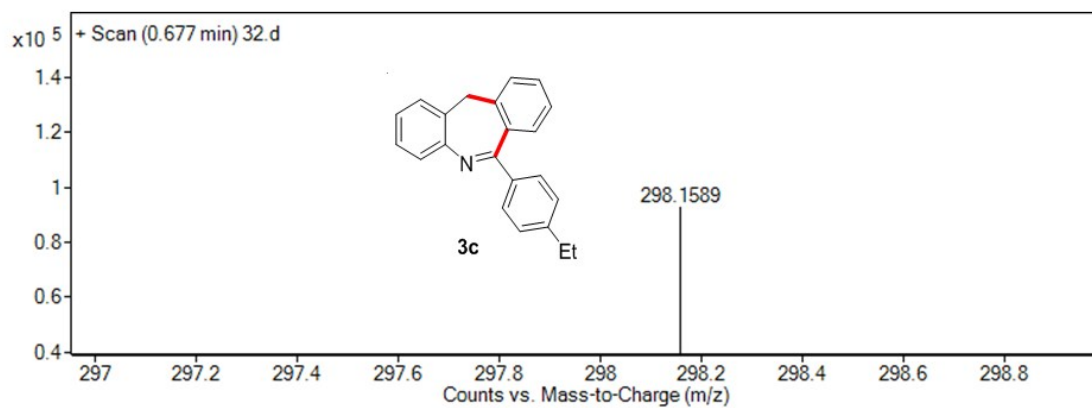

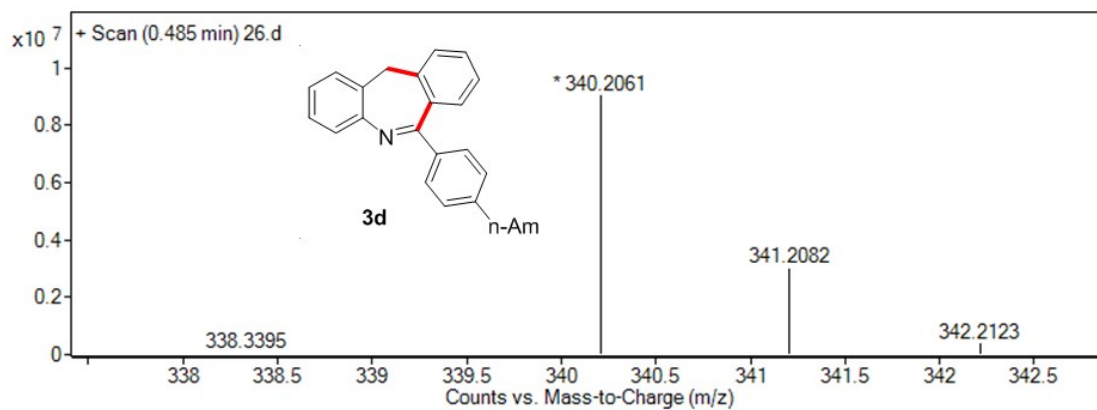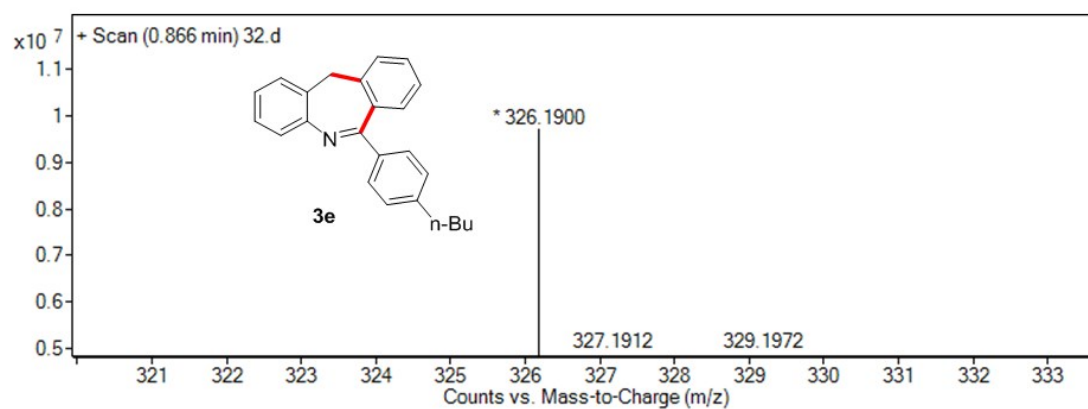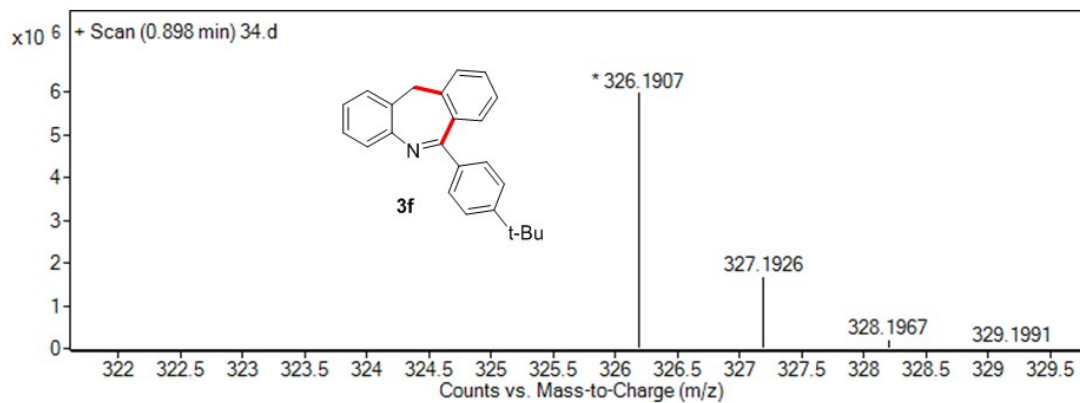

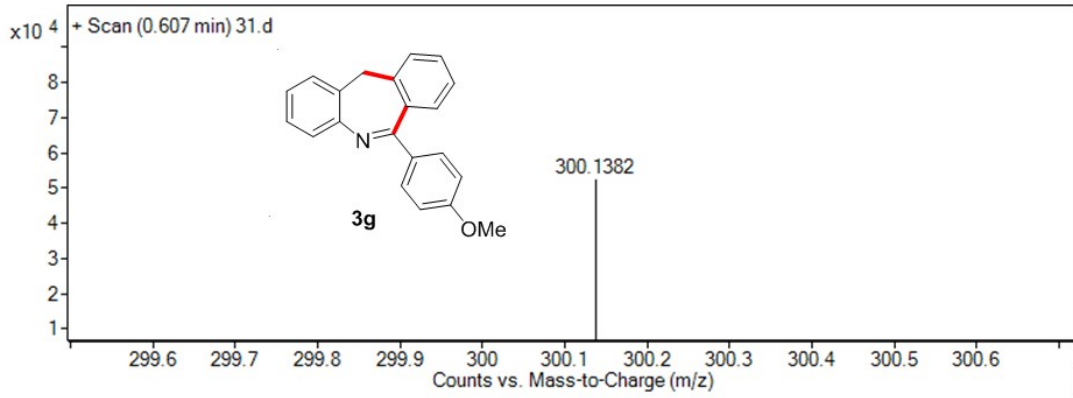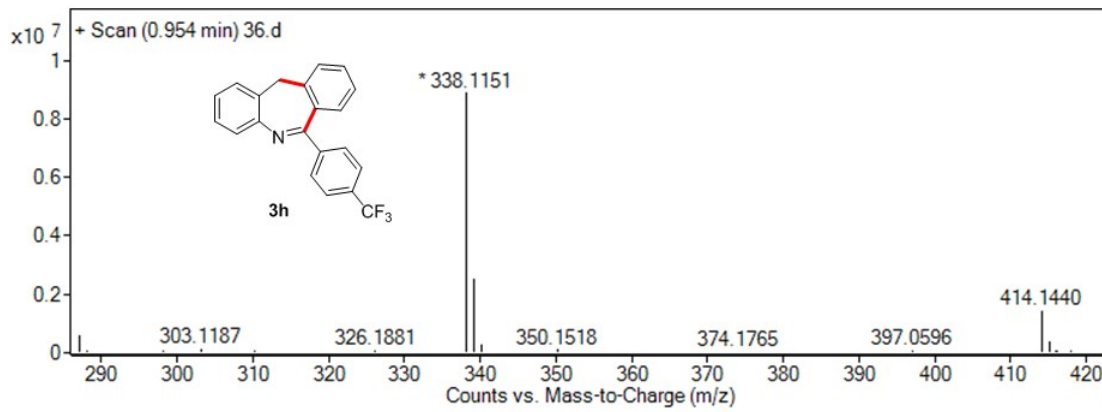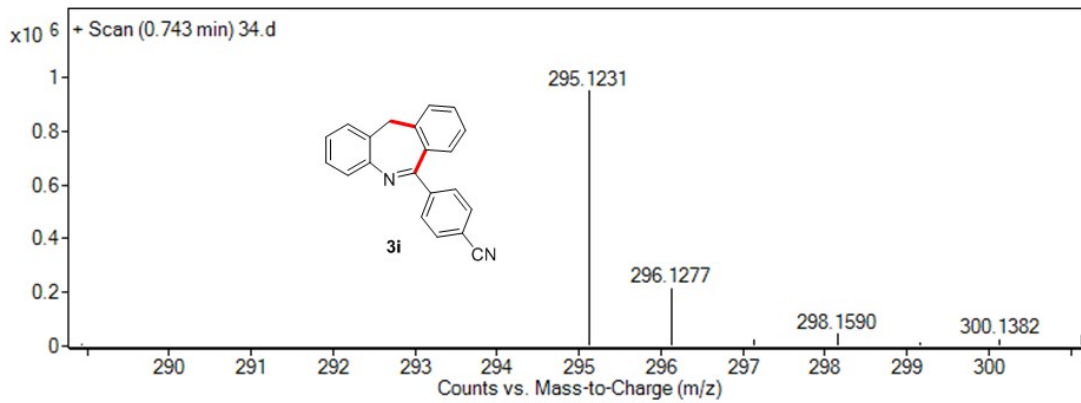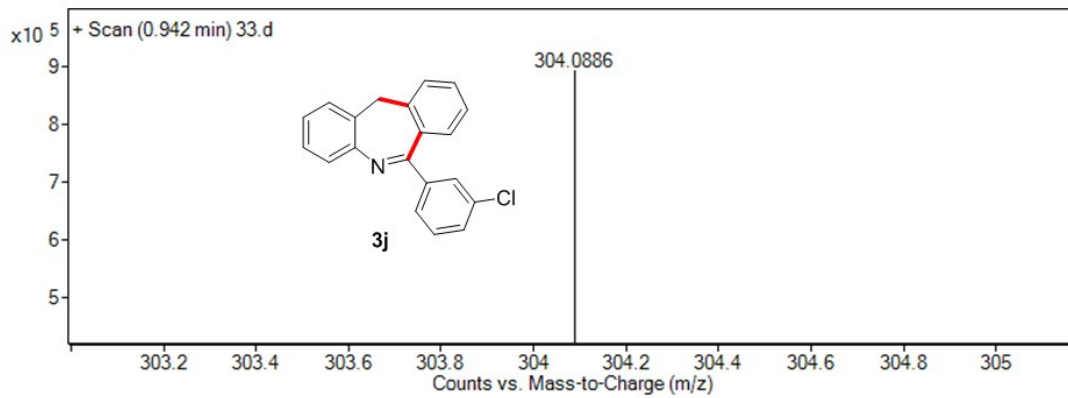

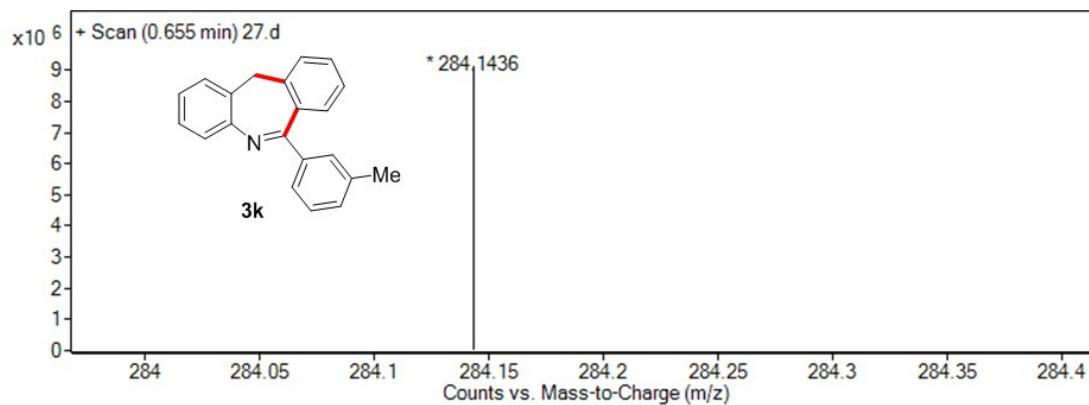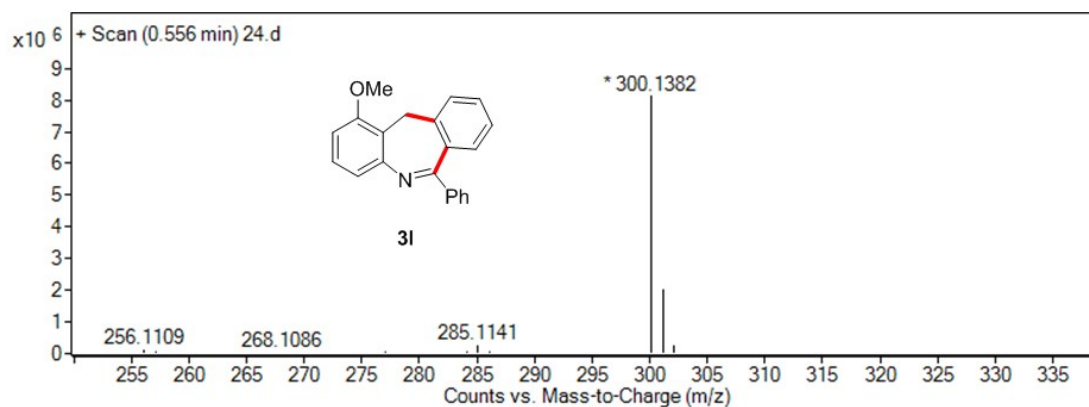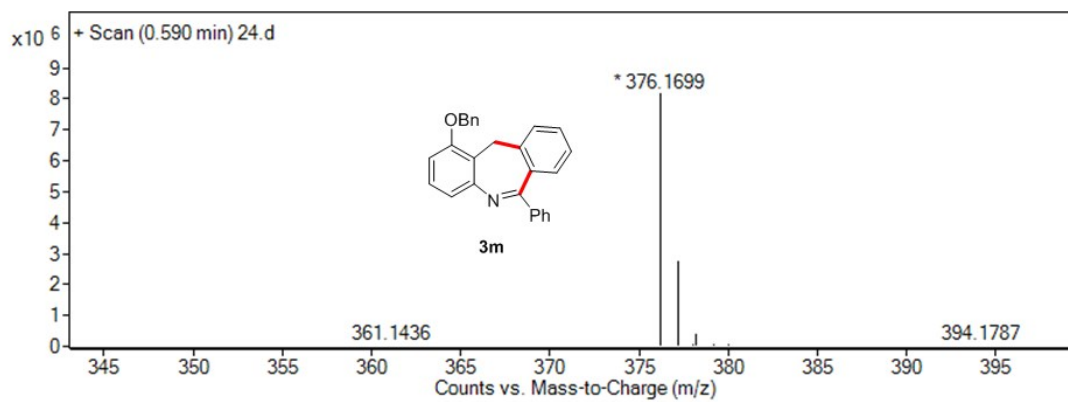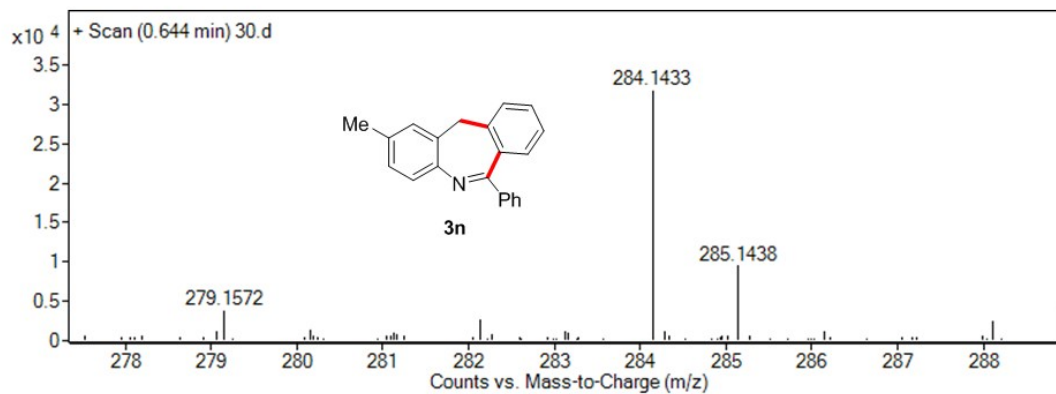

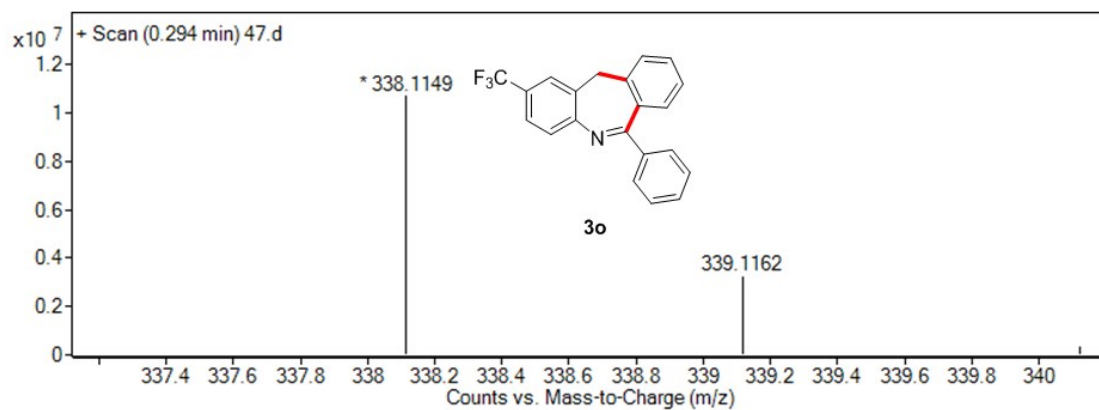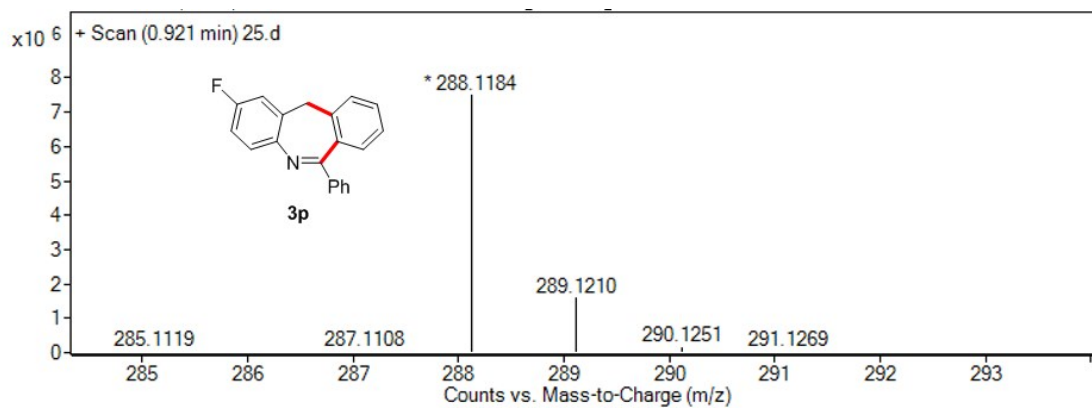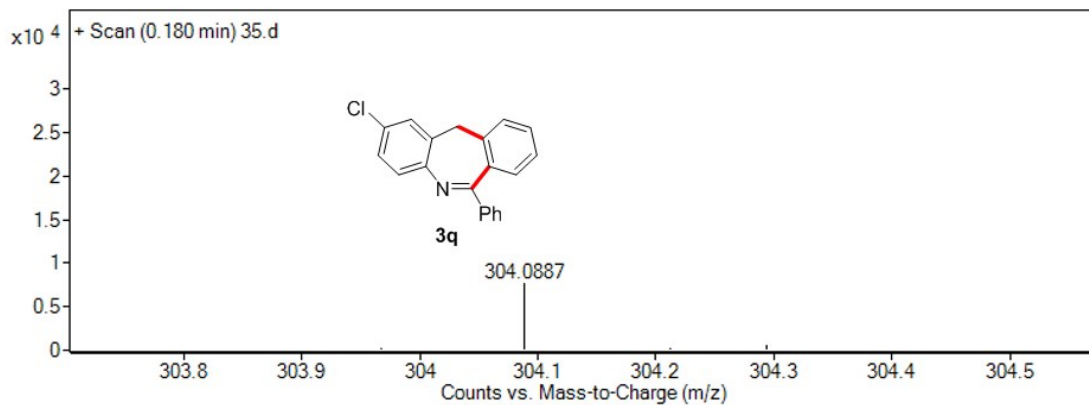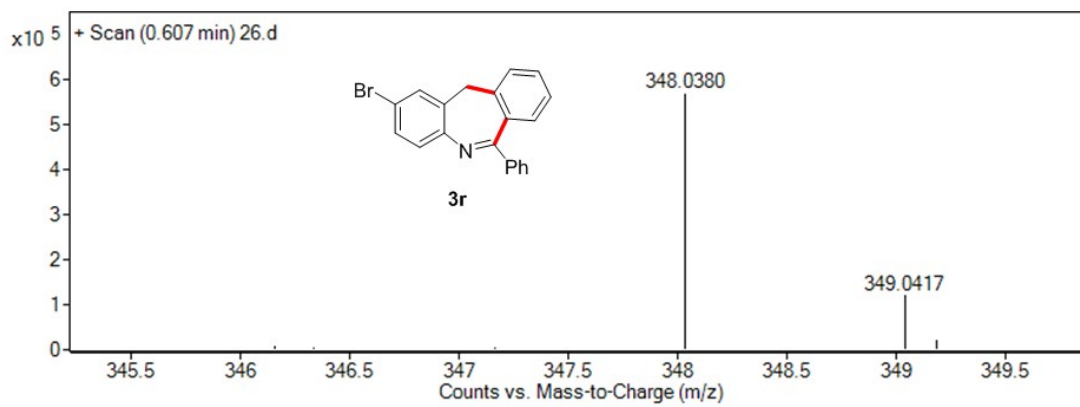



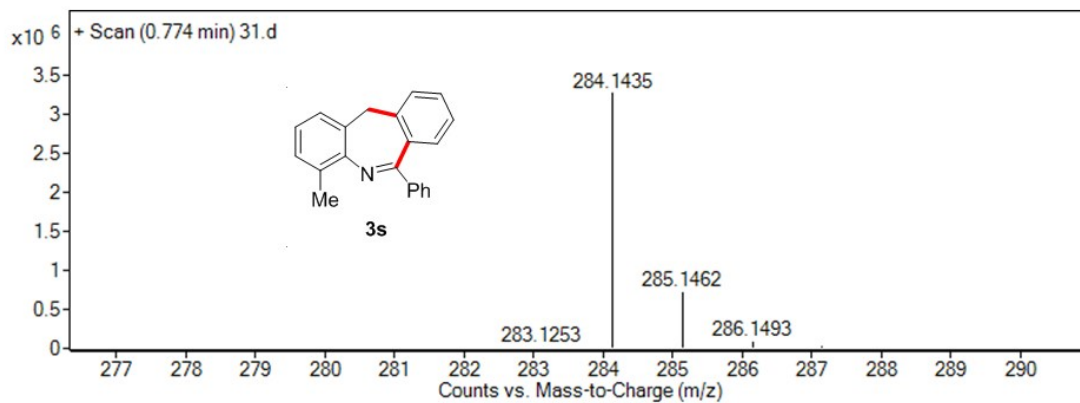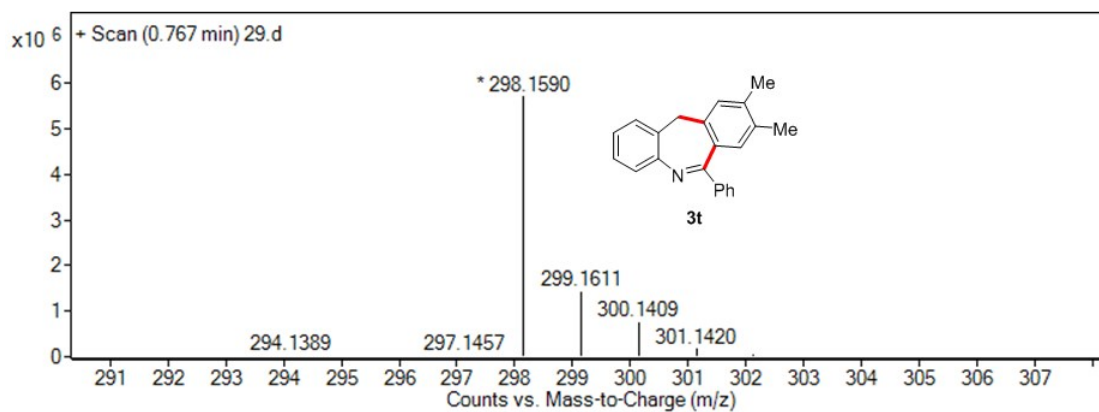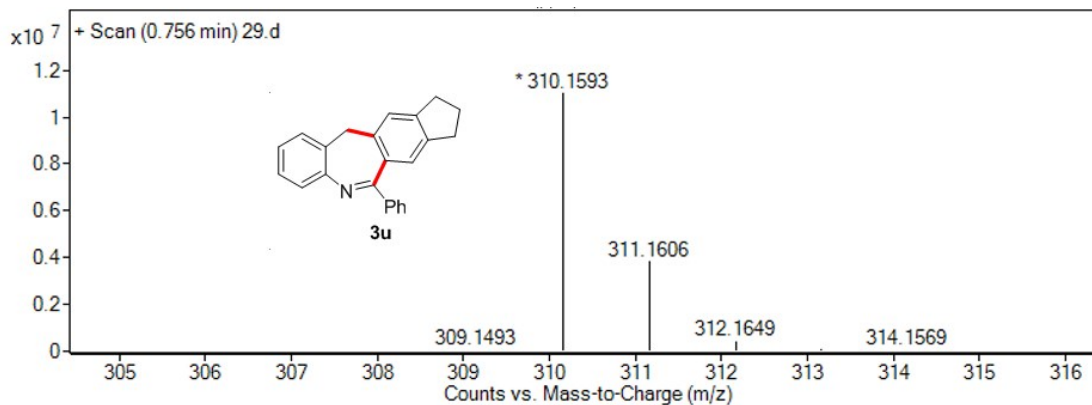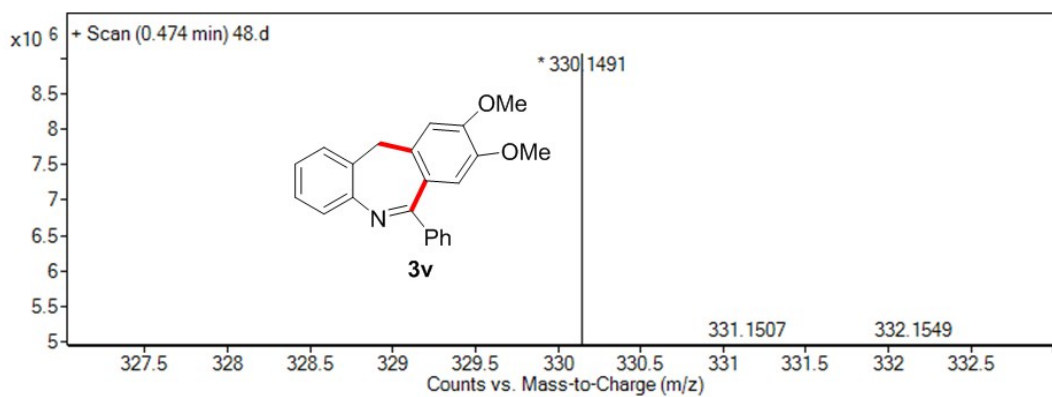

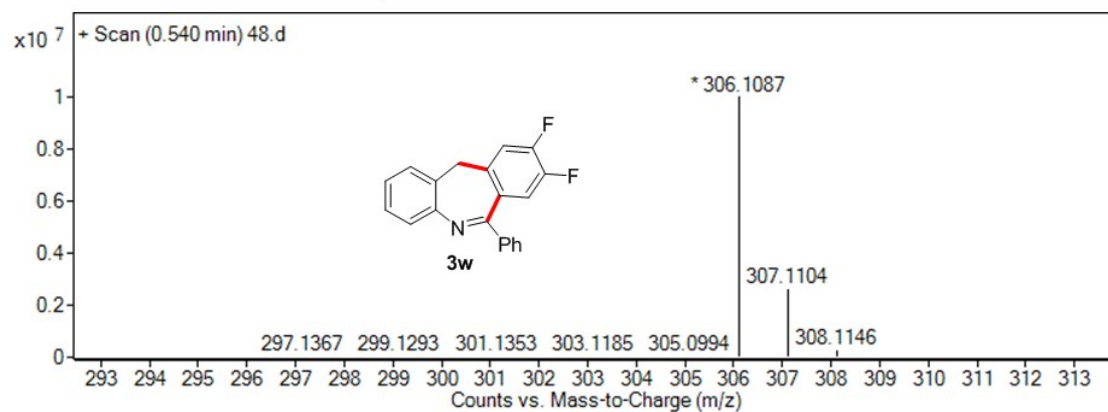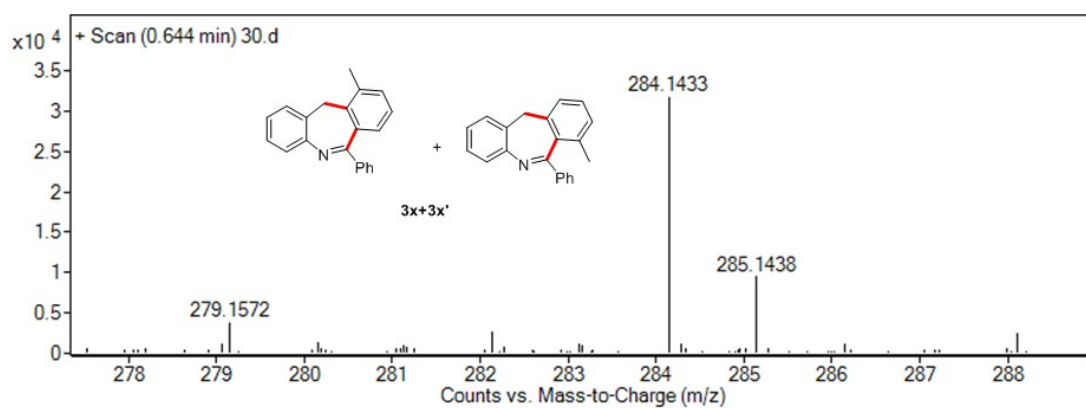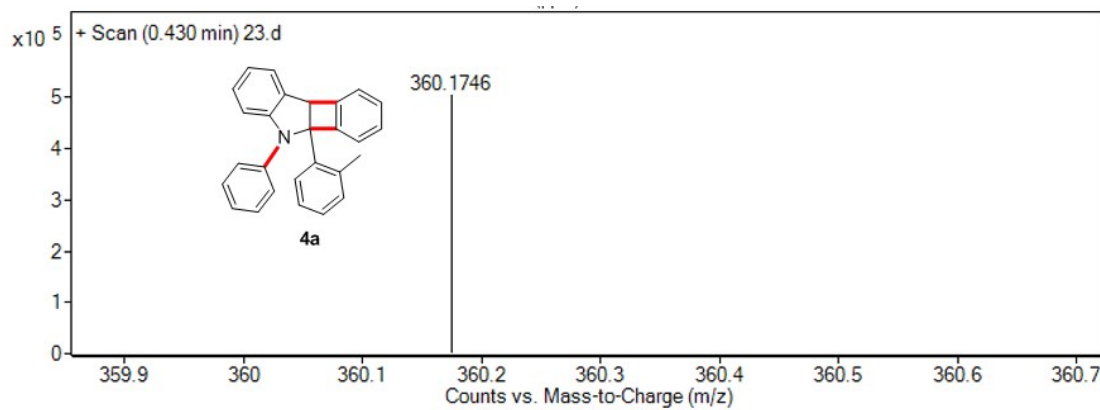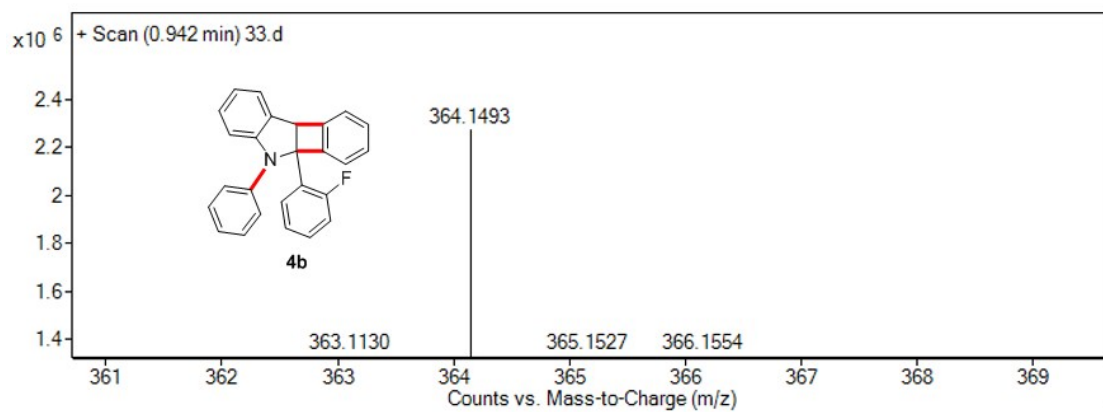

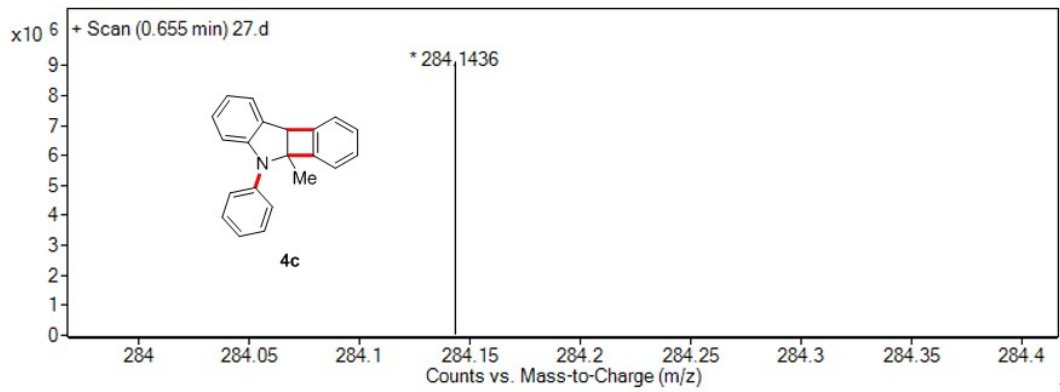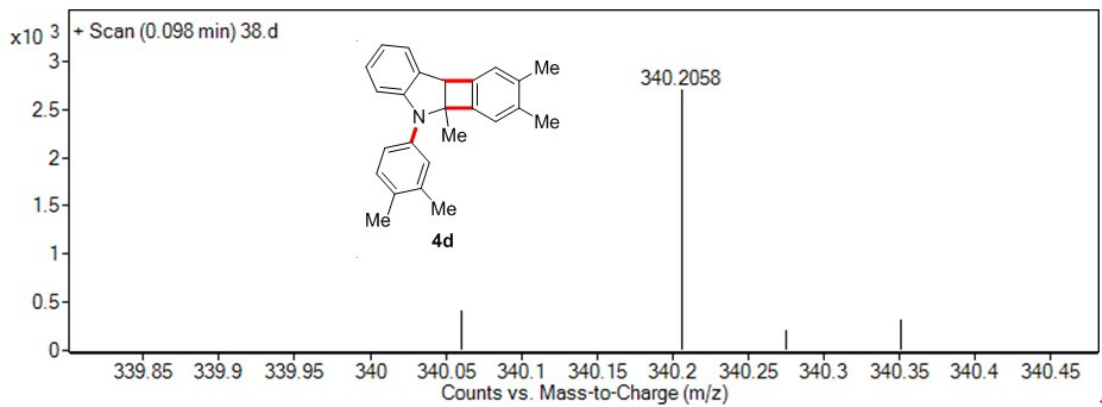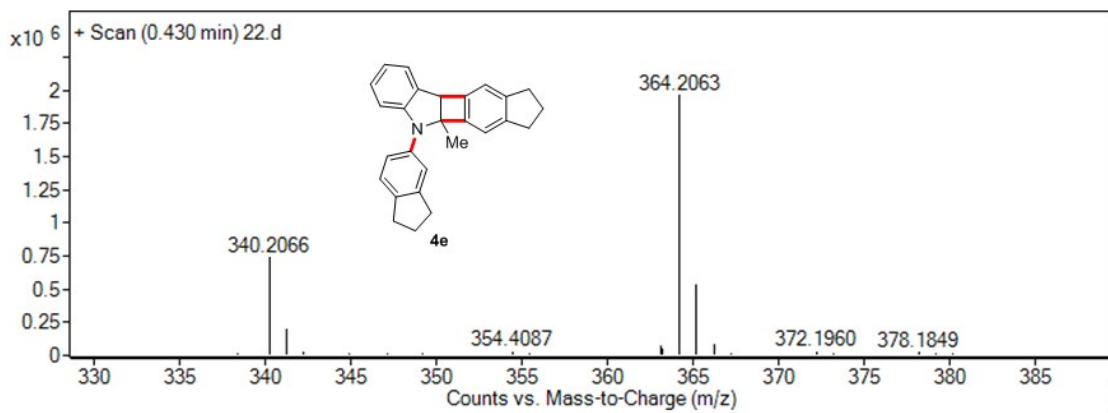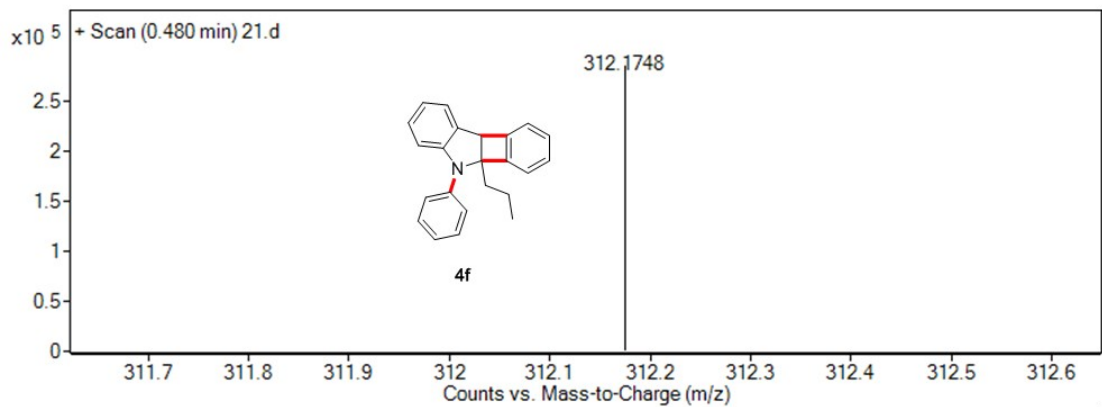

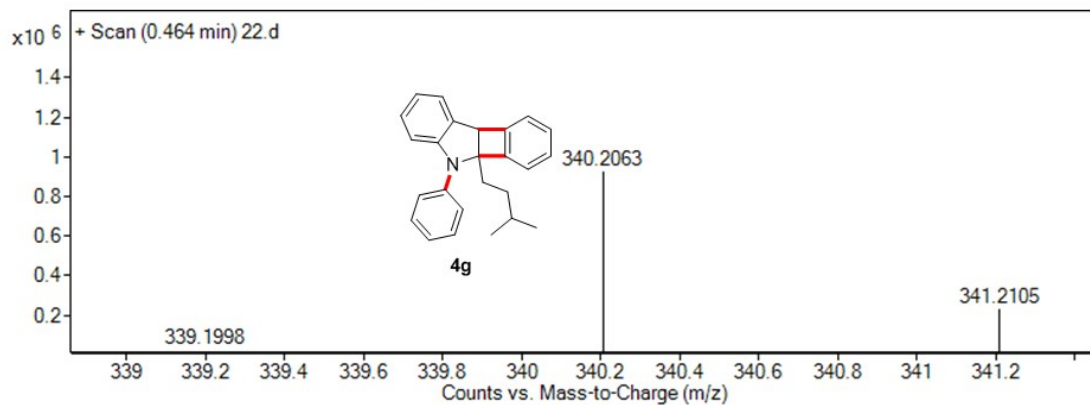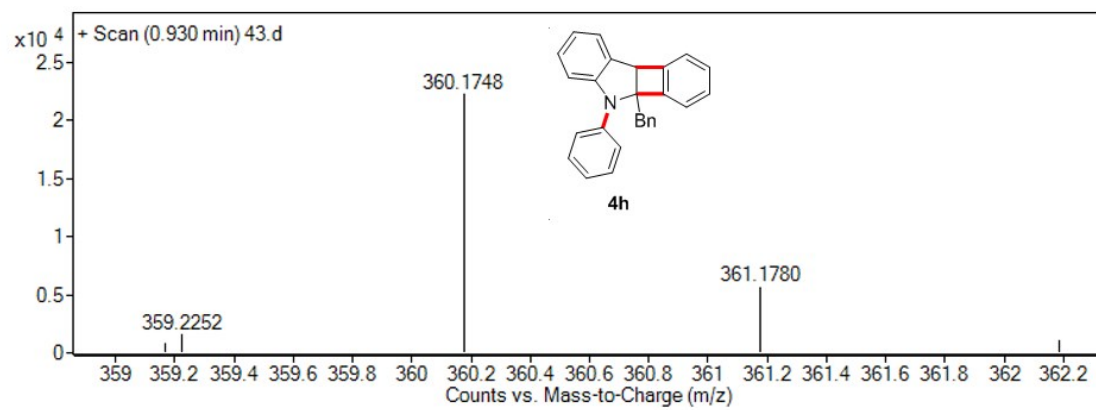

## 9. Crystallographic Data for 3a and 4a

### 9.1 Crystallographic Data for 3a

#### checkCIF/PLATON report

You have not supplied any structure factors. As a result the full set of tests cannot be run.

THIS REPORT IS FOR GUIDANCE ONLY. IF USED AS PART OF A REVIEW PROCEDURE FOR PUBLICATION, IT SHOULD NOT REPLACE THE EXPERTISE OF AN EXPERIENCED CRYSTALLOGRAPHIC REFEREE.

No syntax errors found. CIF dictionary Interpreting this report

#### Datablock: 1

---

Bond precision: C-C = 0.0052 Å                      Wavelength=0.71073

Cell:                      a=18.566 (2)                      b=5.4612 (7)                      c=14.391 (2)  
                            alpha=90                      beta=90                      gamma=90

Temperature:                      296 K

|                | Calculated   | Reported     |
|----------------|--------------|--------------|
| Volume         | 1459.1 (3)   | 1459.1 (3)   |
| Space group    | P c a 21     | P c a 21     |
| Hall group     | P 2c -2ac    | P 2c -2ac    |
| Moiety formula | C20 H15 N    | C20 H15 N    |
| Sum formula    | C20 H15 N    | C20 H15 N    |
| Mr             | 269.33       | 269.33       |
| Dx, g cm-3     | 1.226        | 1.226        |
| Z              | 4            | 4            |
| Mu (mm-1)      | 0.071        | 0.071        |
| F000           | 568.0        | 568.0        |
| F000'          | 568.20       |              |
| h,k,lmax       | 22, 6, 17    | 22, 6, 17    |
| Nref           | 2571 [ 1344] | 2555         |
| Tmin, Tmax     | 0.980, 0.985 | 0.628, 0.746 |
| Tmin'          | 0.980        |              |

Correction method= # Reported T Limits: Tmin=0.628 Tmax=0.746  
AbsCorr = MULTI-SCAN

Data completeness= 1.90/0.99                      Theta(max) = 25.000

R(reflections)= 0.0503 ( 1786)                      wR2(reflections)= 0.0915 ( 2555)

S = 1.025                      Npar= 191

---

The following ALERTS were generated. Each ALERT has the format  
**test-name\_ALERT\_alert-type\_alert-level.**  
Click on the hyperlinks for more details of the test.

PLATON version of 05/12/2020; check.def file version of 05/12/2020

Datablock 1 - clipped plot

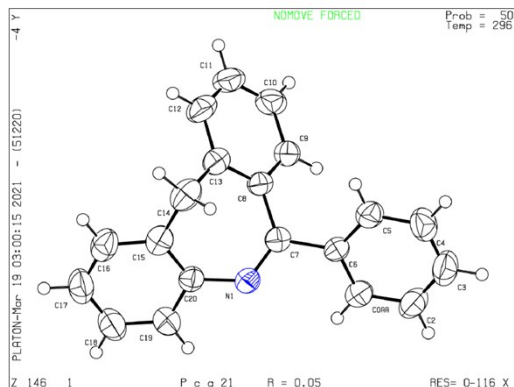

## 9.2 Crystallographic Data for 4a

### checkCIF/PLATON report

You have not supplied any structure factors. As a result the full set of tests cannot be run.

THIS REPORT IS FOR GUIDANCE ONLY. IF USED AS PART OF A REVIEW PROCEDURE FOR PUBLICATION, IT SHOULD NOT REPLACE THE EXPERTISE OF AN EXPERIENCED CRYSTALLOGRAPHIC REFEREE.

No syntax errors found. CIF dictionary Interpreting this report

### Datablock: t

---

Bond precision: C-C = 0.0036 A      Wavelength=0.71073

Cell:            a=9.0099(13)      b=10.3660(15)      c=11.4985(16)  
                  alpha=67.411(2)      beta=86.553(2)      gamma=87.881(2)

Temperature:    296 K

|                | Calculated  | Reported    |
|----------------|-------------|-------------|
| Volume         | 989.6(2)    | 989.6(2)    |
| Space group    | P -1        | P -1        |
| Hall group     | -P 1        | -P 1        |
| Moiety formula | C27 H21 N   | C27 H21 N   |
| Sum formula    | C27 H21 N   | C27 H21 N   |
| Mr             | 359.45      | 359.45      |
| Dx, g cm-3     | 1.206       | 1.206       |
| Z              | 2           | 2           |
| Mu (mm-1)      | 0.069       | 0.069       |
| F000           | 380.0       | 380.0       |
| F000'          | 380.13      |             |
| h,k,lmax       | 11,13,15    | 11,13,15    |
| Nref           | 4650        | 4351        |
| Tmin,Tmax      | 0.987,0.990 | 0.656,0.746 |
| Tmin'          | 0.987       |             |

Correction method= # Reported T Limits: Tmin=0.656 Tmax=0.746  
AbsCorr = NONE

Data completeness= 0.936      Theta(max)= 27.735

R(reflections)= 0.0582( 2652)      wR2(reflections)= 0.1679( 4351)

S = 1.007      Npar= 254

---

The following ALERTS were generated. Each ALERT has the format  
**test-name ALERT\_alert-type alert-level.**  
Click on the hyperlinks for more details of the test.

Datablock: t - r0ipped plot

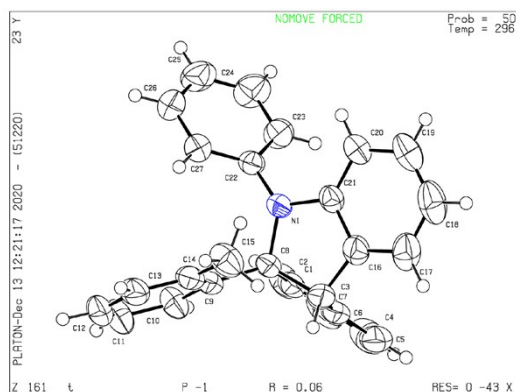

Supplement: d1cc02550c1.pdf [file d1cc02550c1.pdf]
